# Supplementary material for: ANXA2 promotes osteogenic differentiation and inhibits cellular senescence of periodontal ligament cells (PDLCs) in high glucose conditions
Source: PeerJ journal article supplement (doi:10.7717/peerj.18064), 2024-09-18

# $\gamma$ -H2AX (CTRL,8G,10G,25G,40G)

1.

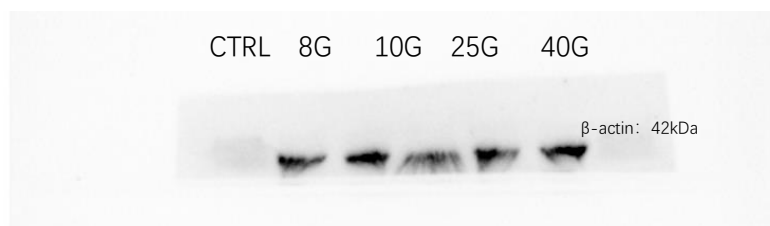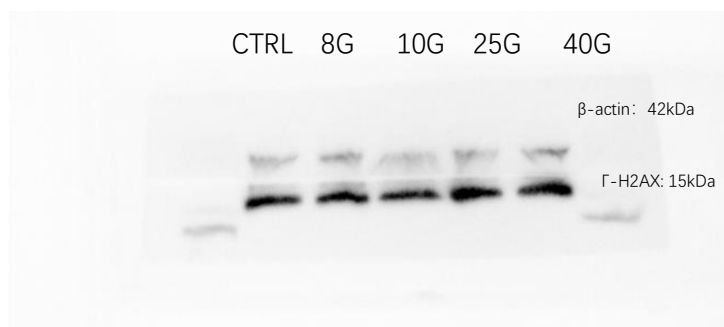

Merge

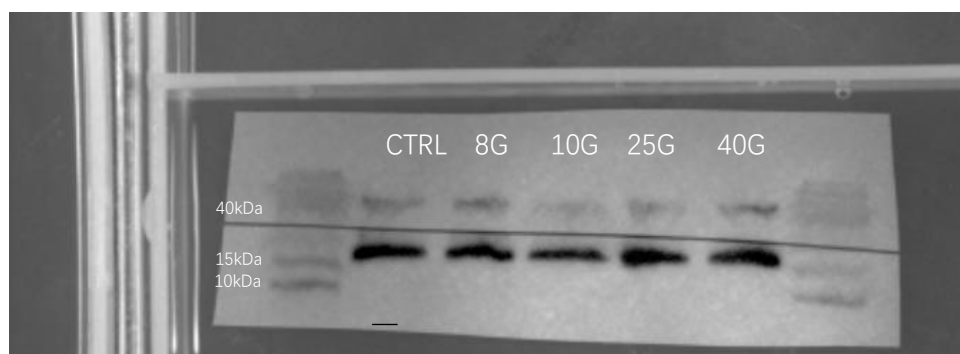

## 2. (repeat)

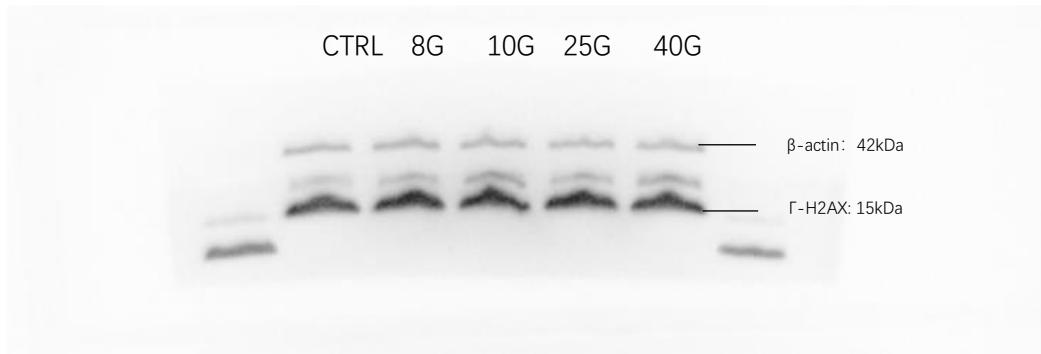

merge

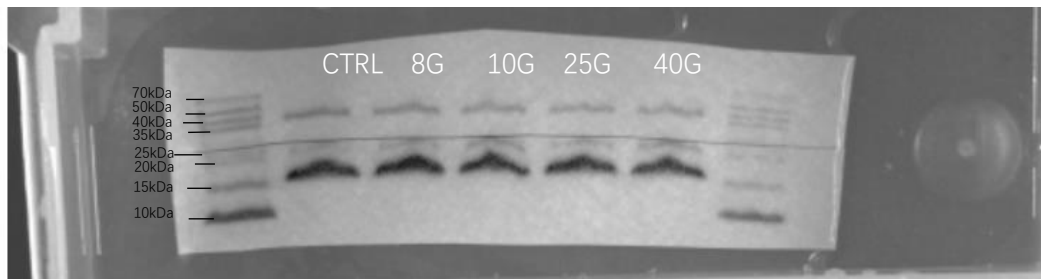

### 3.(repeat)

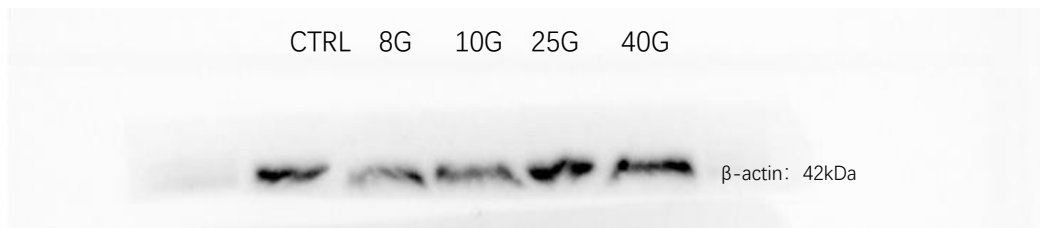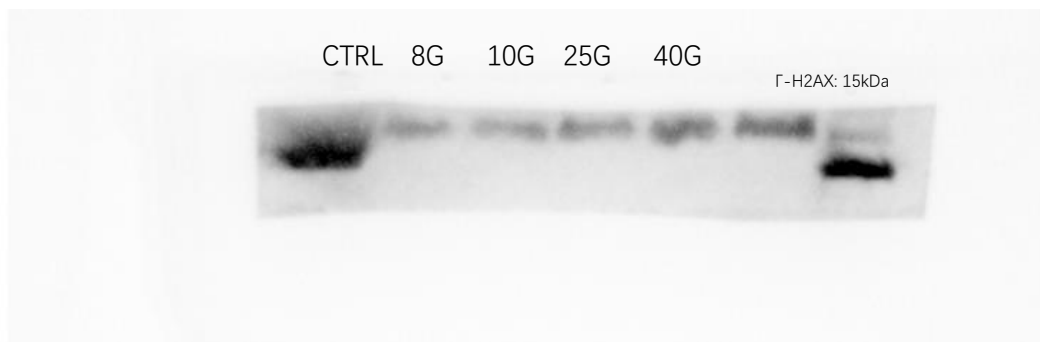

Merge

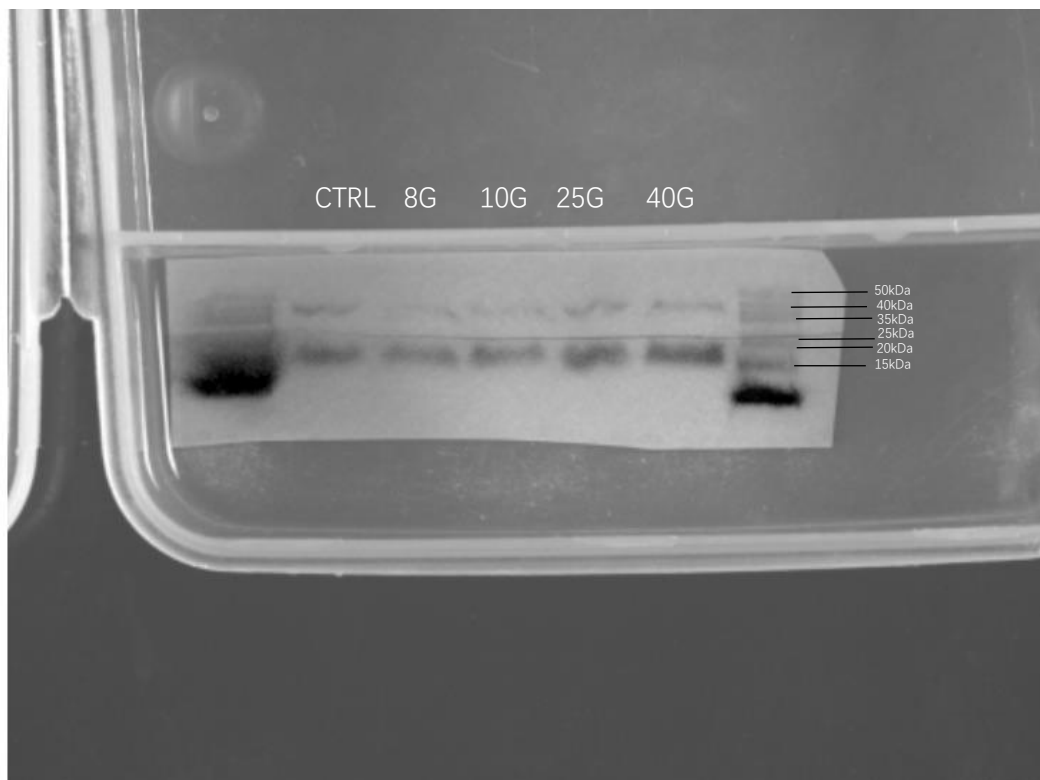

# 4.(repeat)

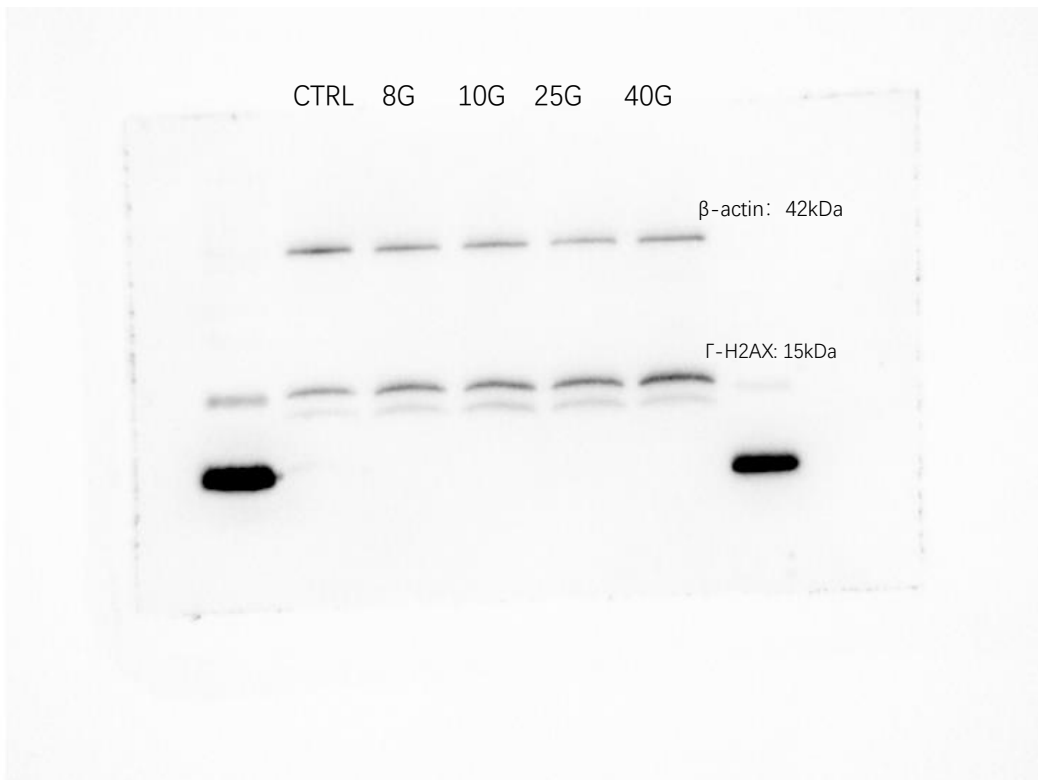

Merge

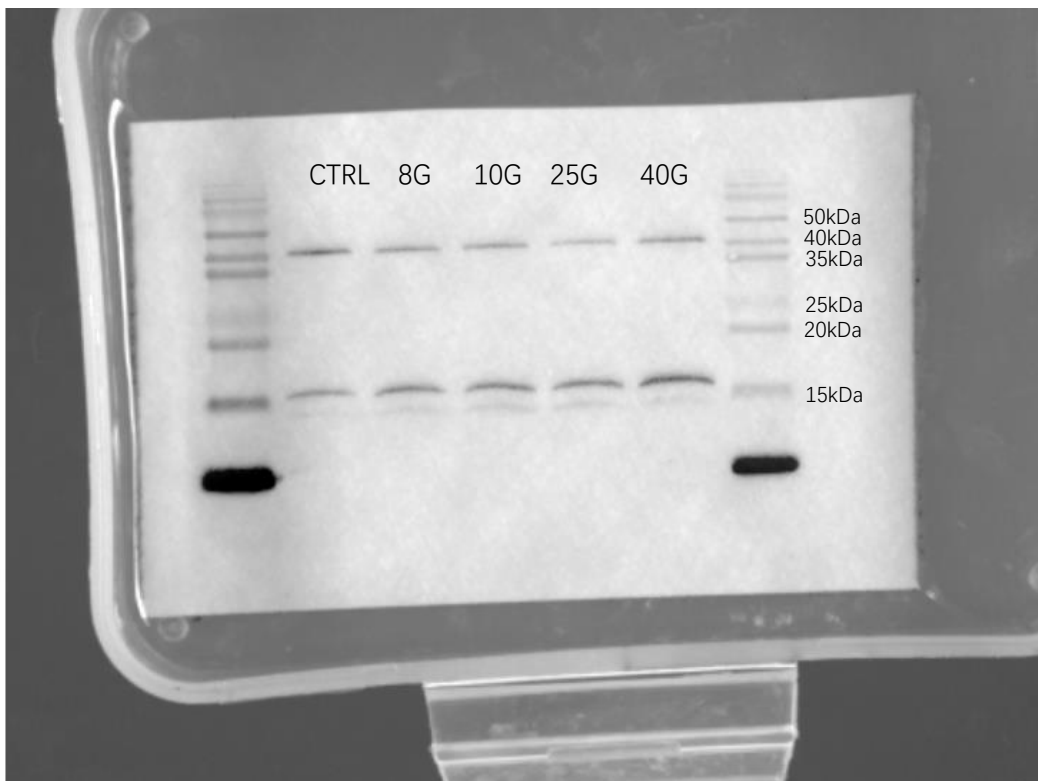

# $\gamma$ -H2AX (CTRL.25G.25G+A.40G.40G+A)

1.

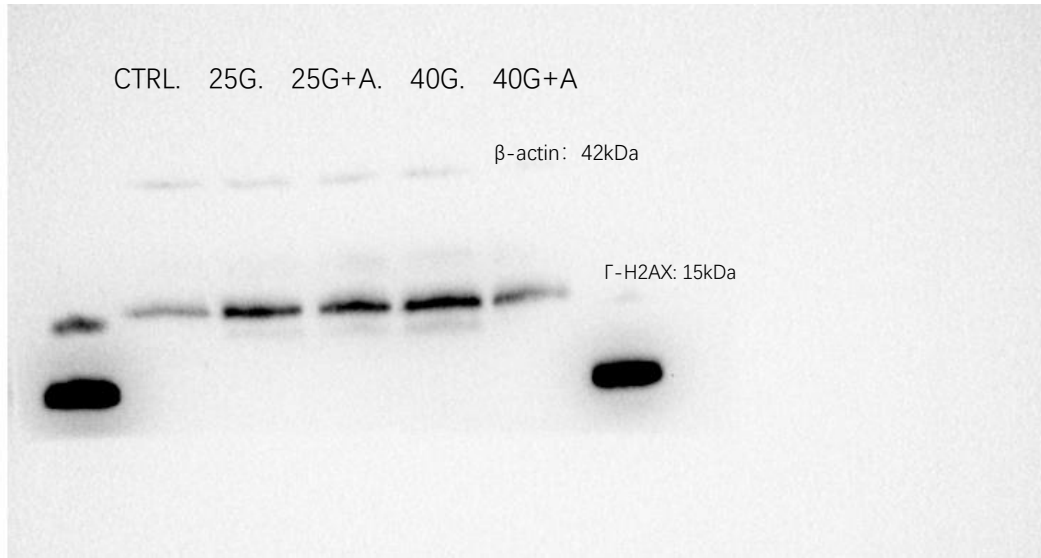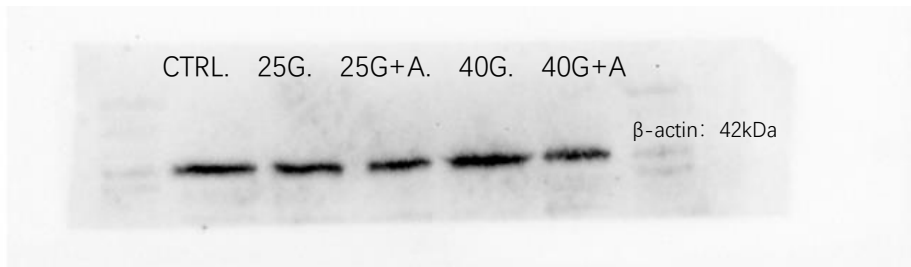

Merge

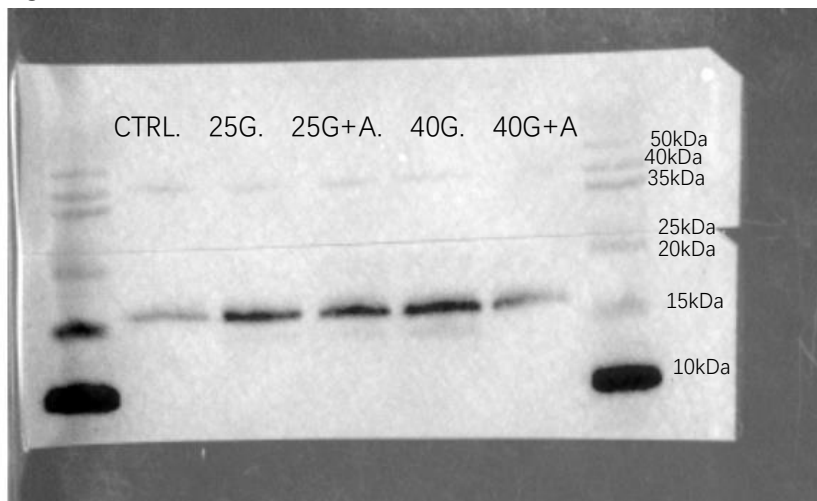

## 2. (repeat)

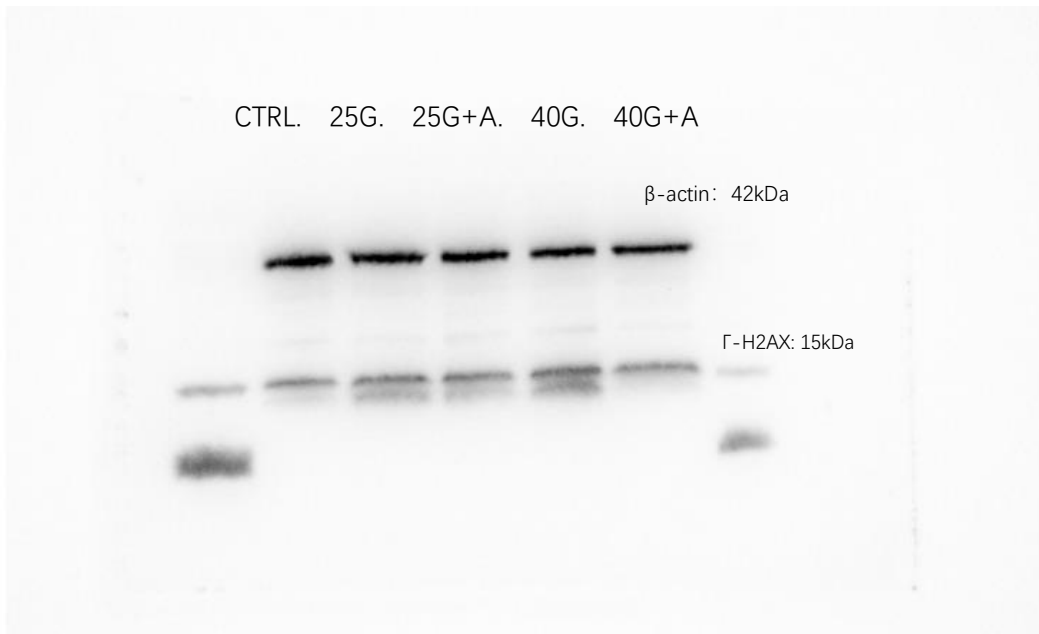

Merge

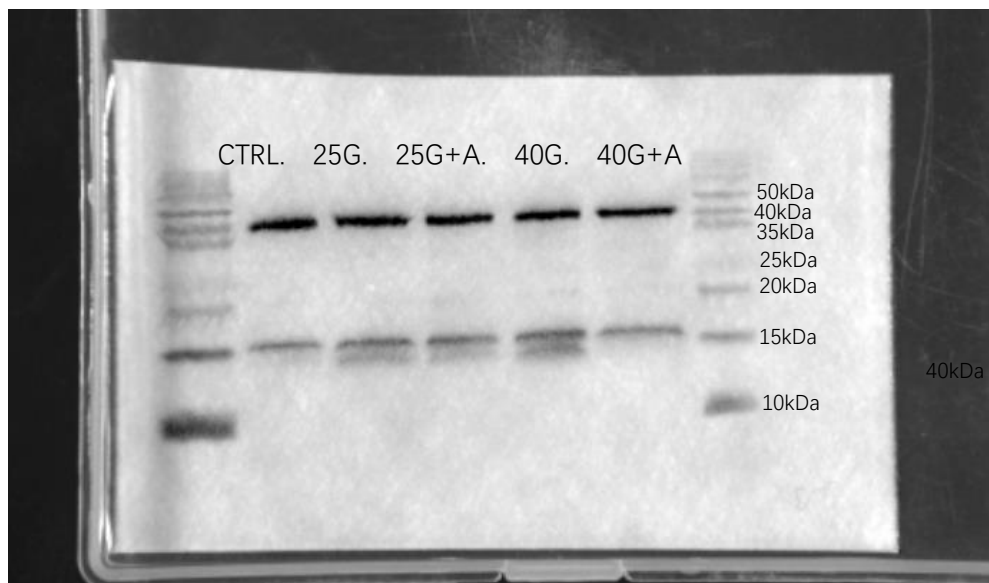

### 3.(repeat)

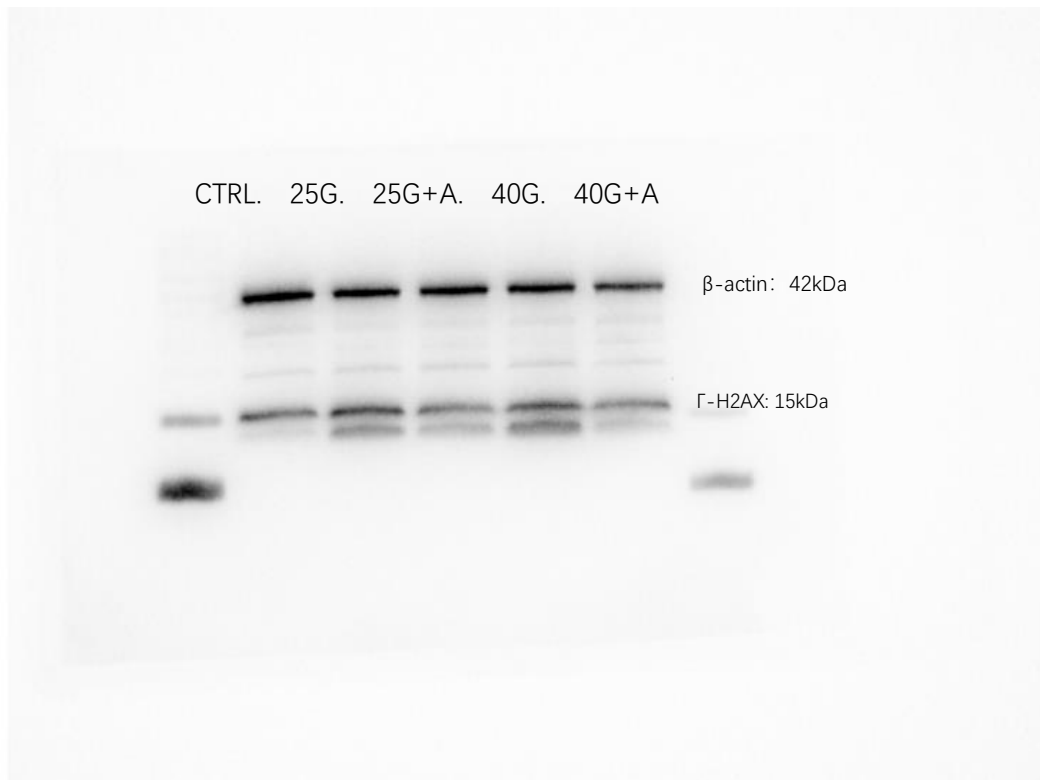

Merge

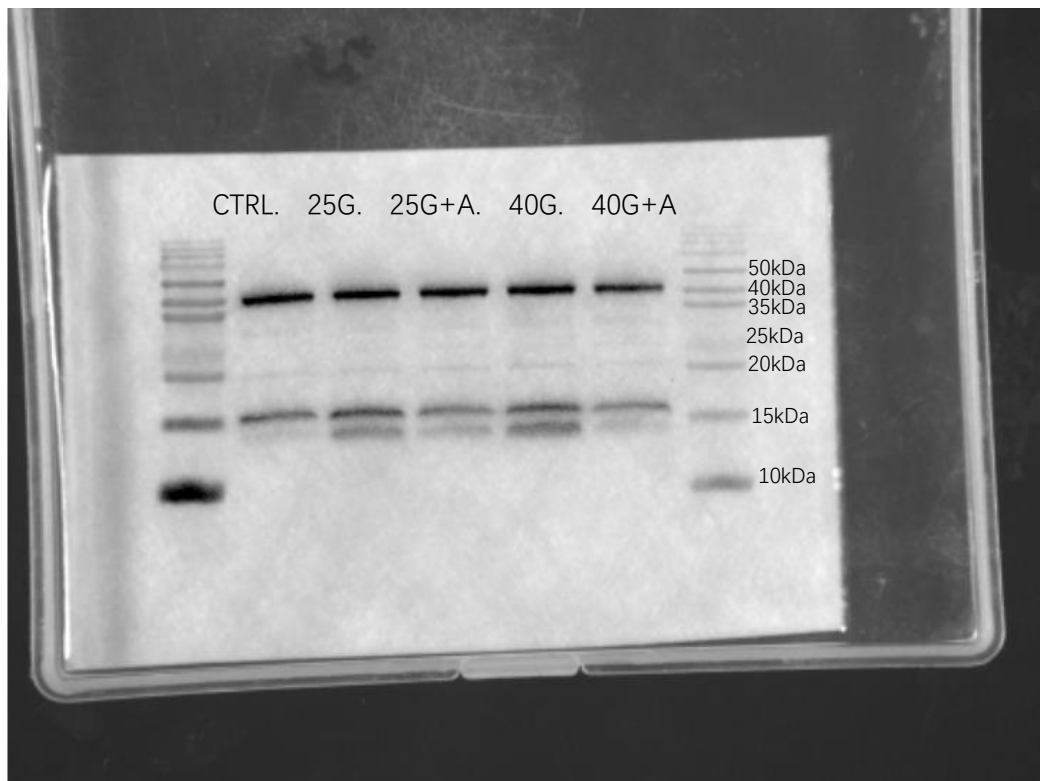

## 2. ANXA2- Day14(CTRL,8G,10G,25G,40G)

1.

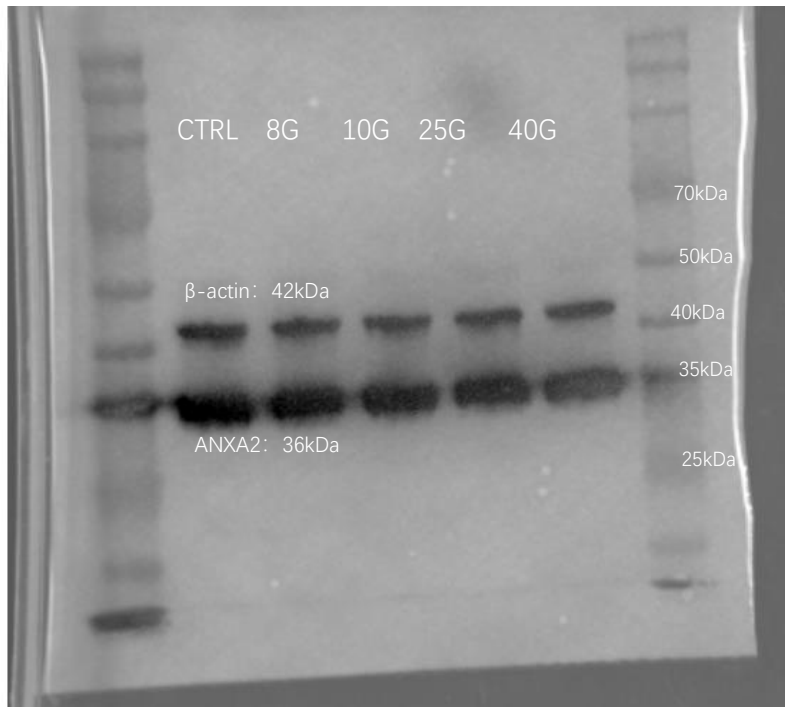

2. (repeat)

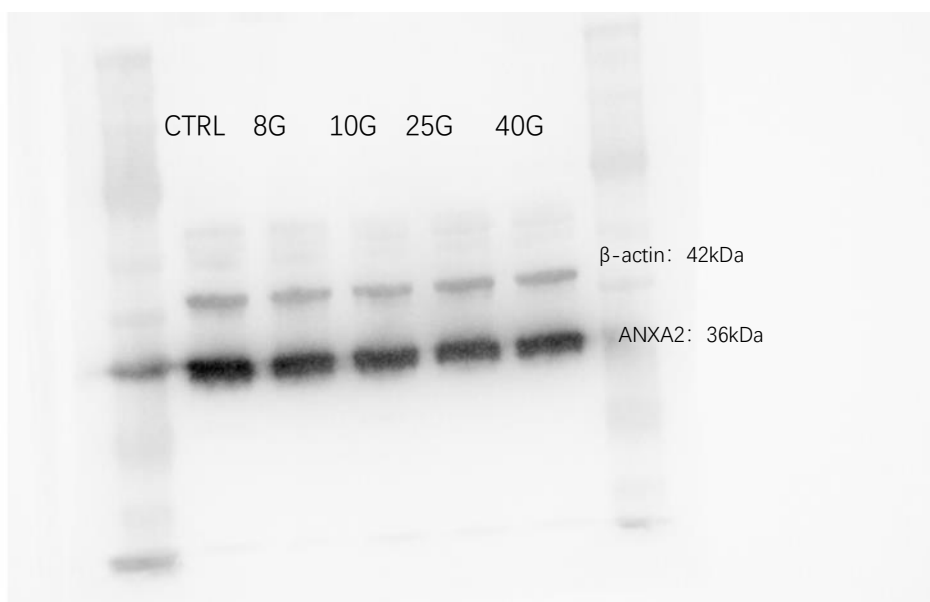



### 3.(repeat)

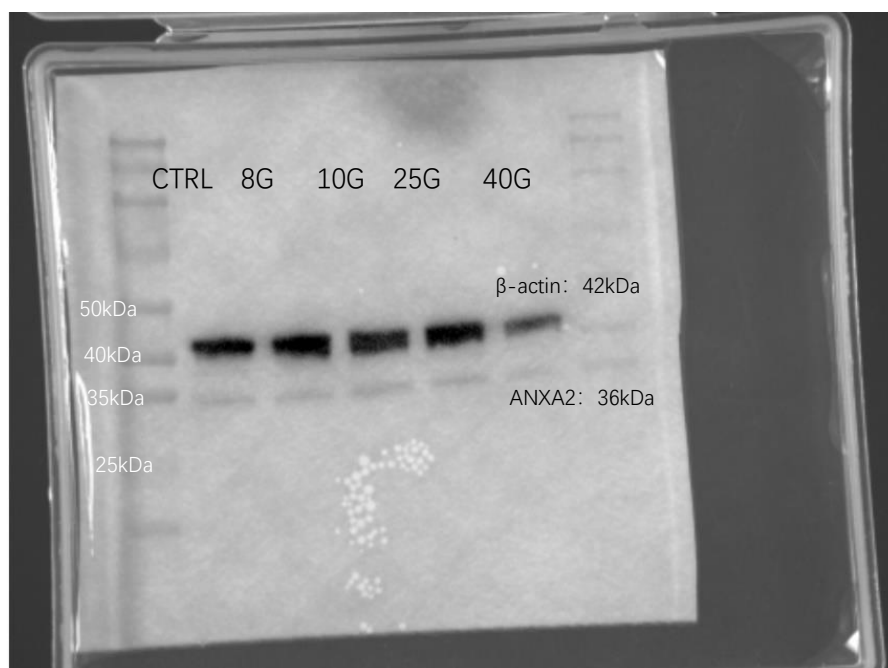

## 4.(repeat)

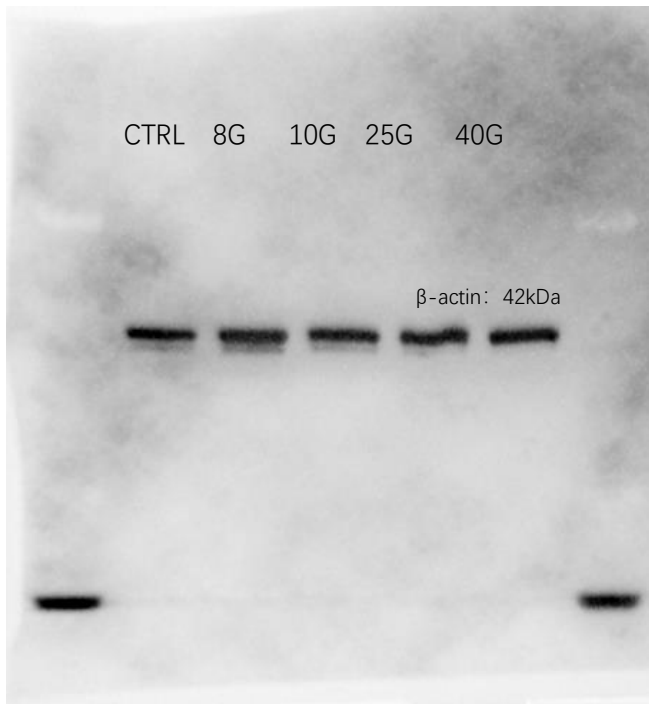

Merge

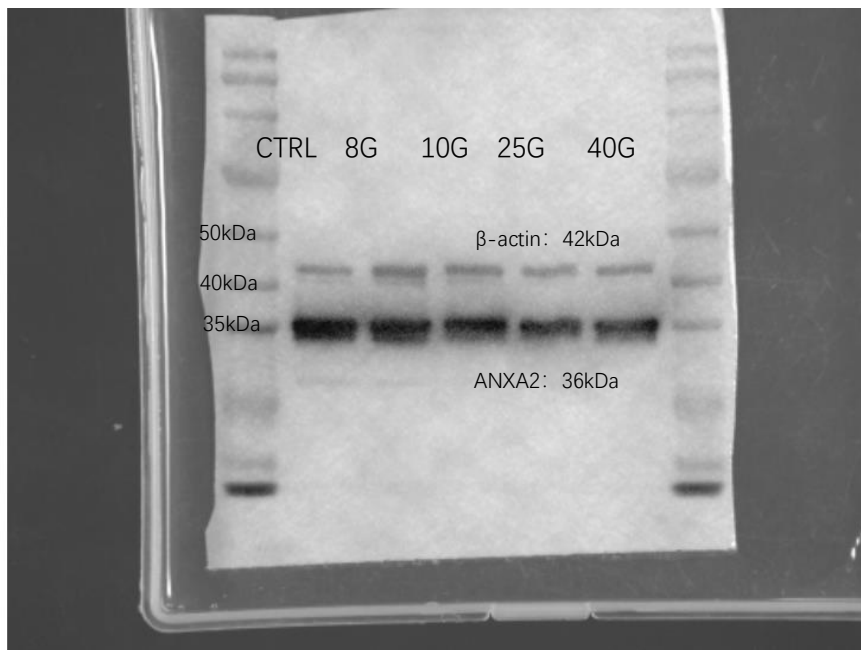

### 3.ANXA2-7DAYS

1.

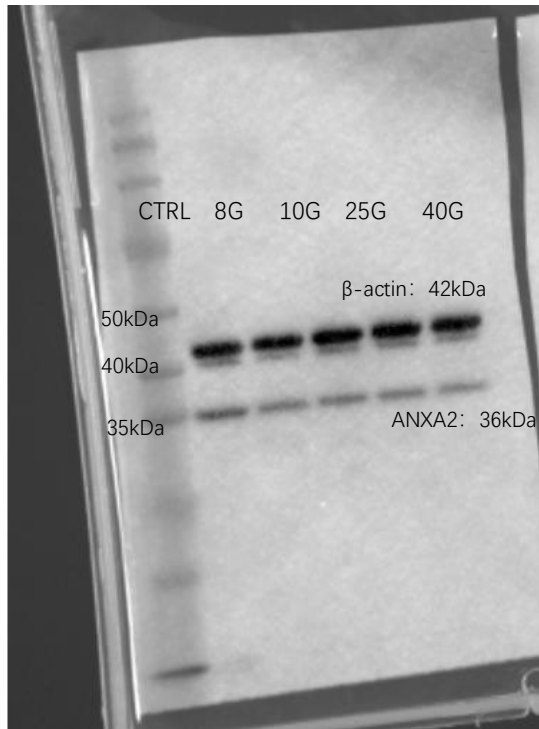

2.(repeat)

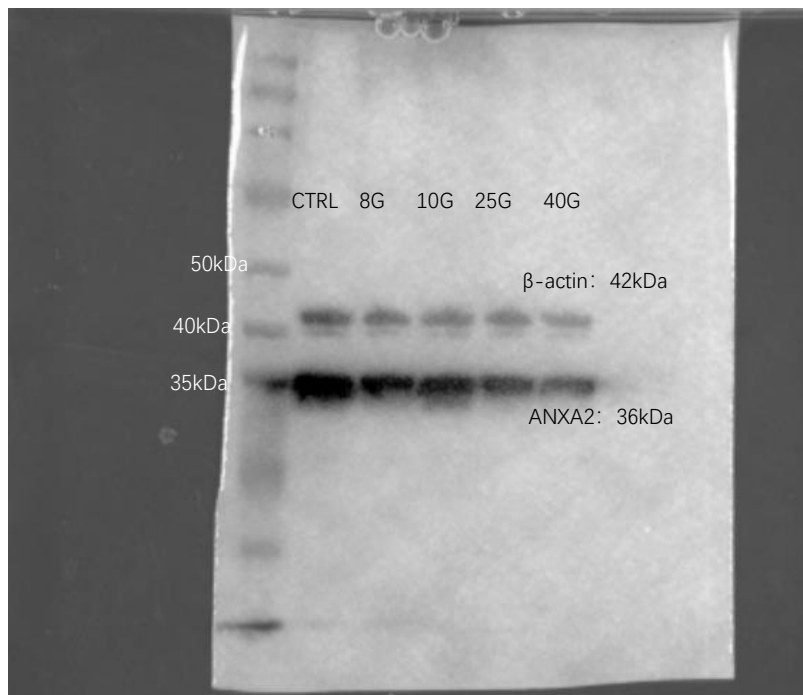

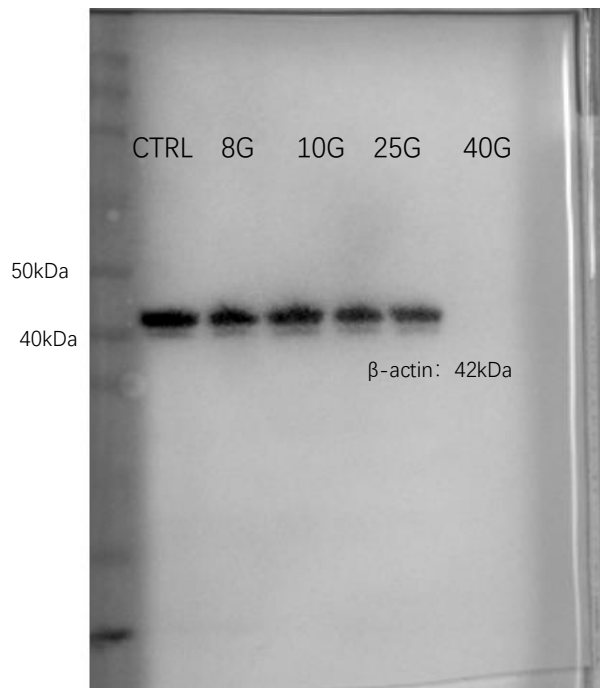

### 3.(repeat)

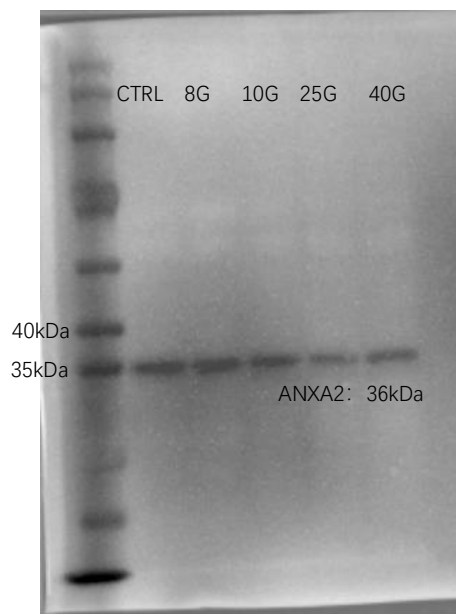

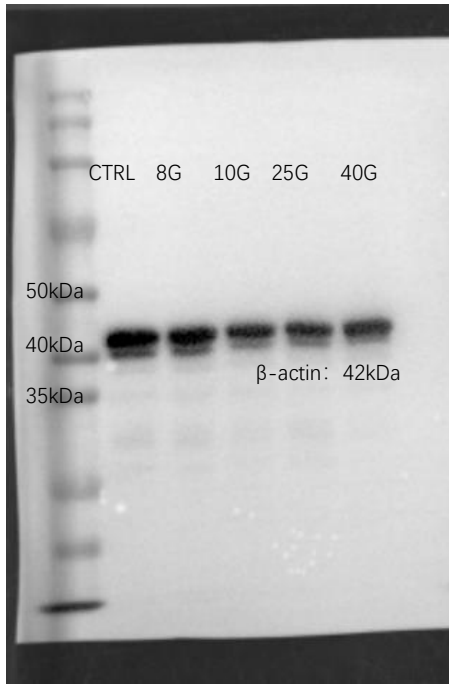

## LC3

1.

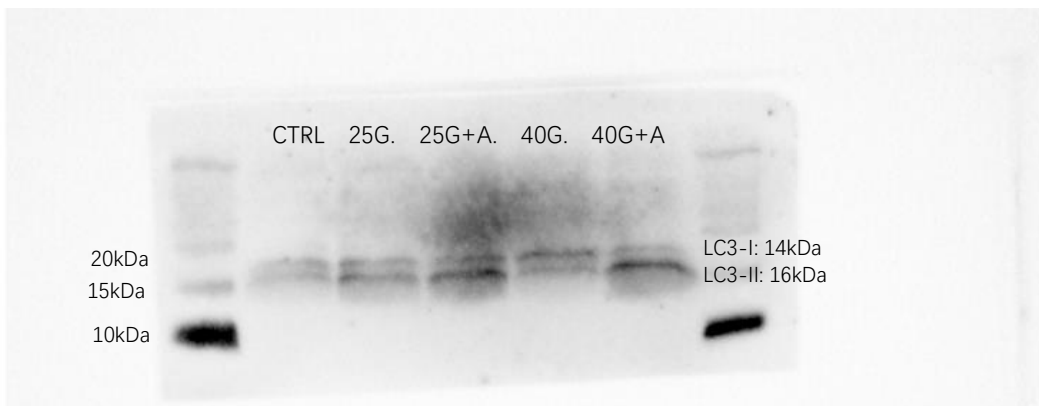

## 2.(repeat)

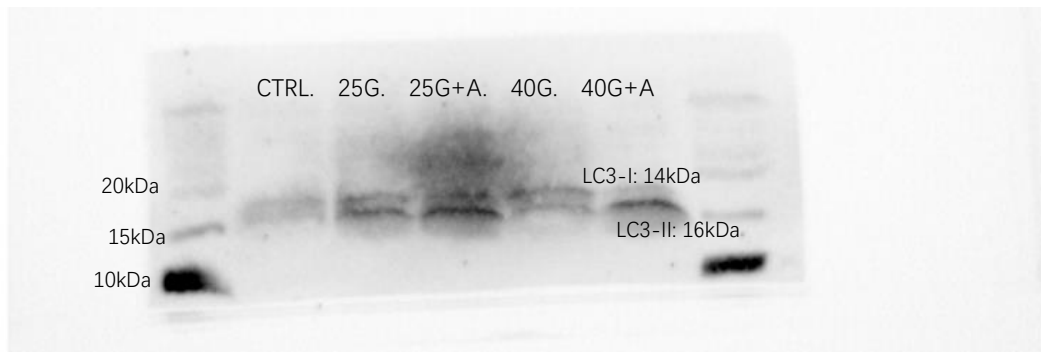

### 1.2. Merge

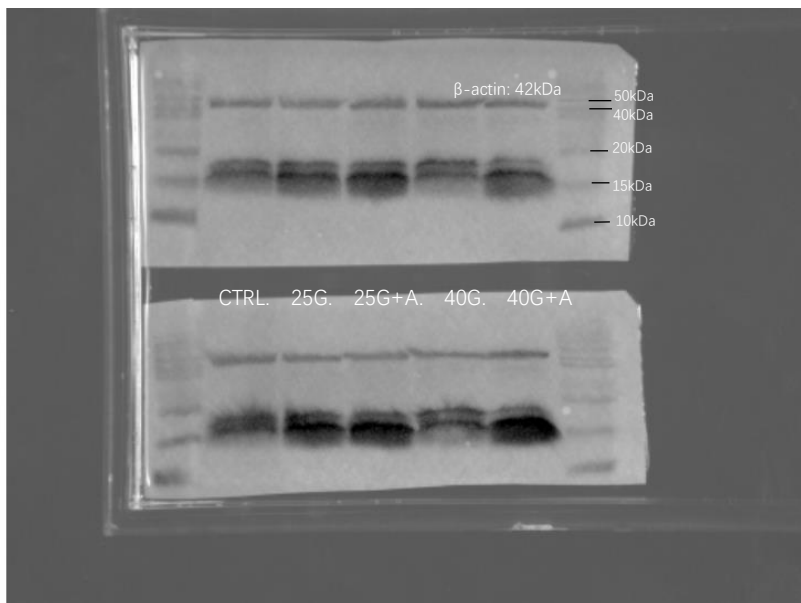

## 3.(repeat)

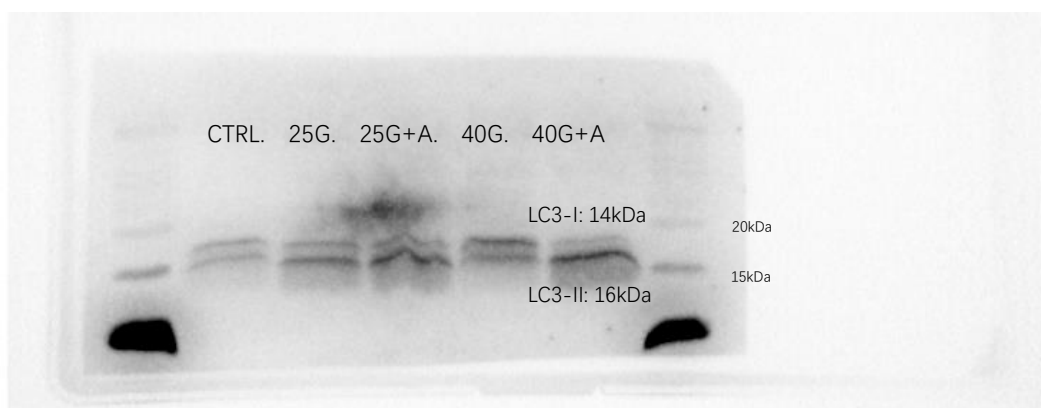

## 4. (repeat)

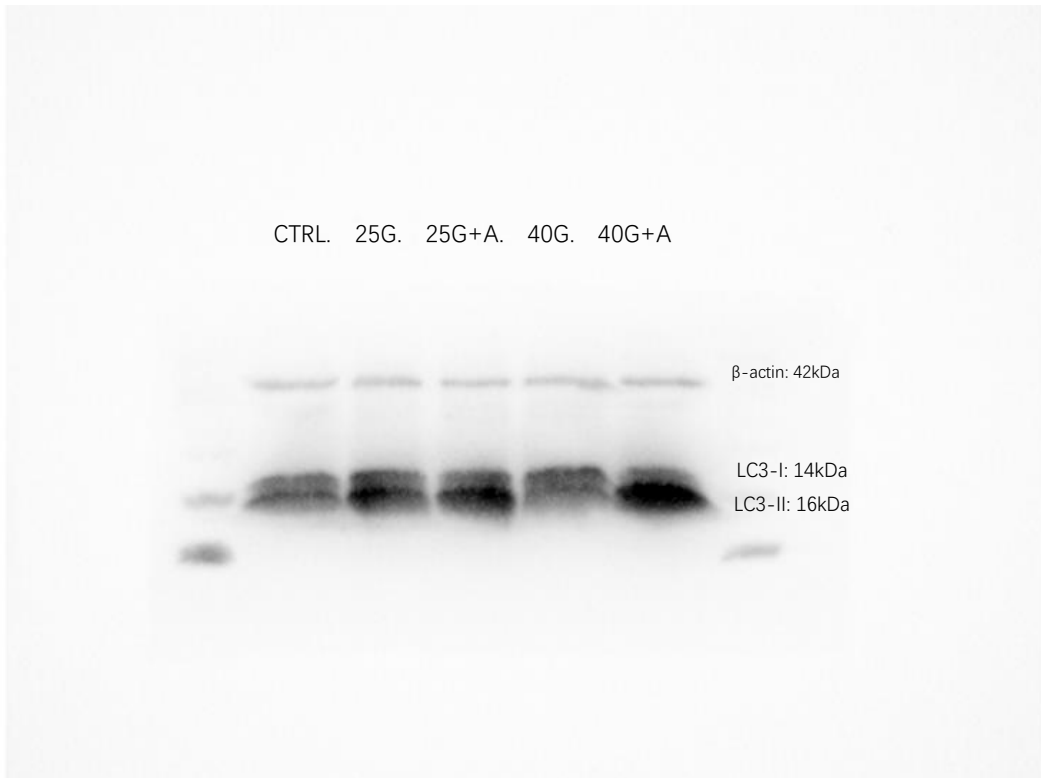

Merge

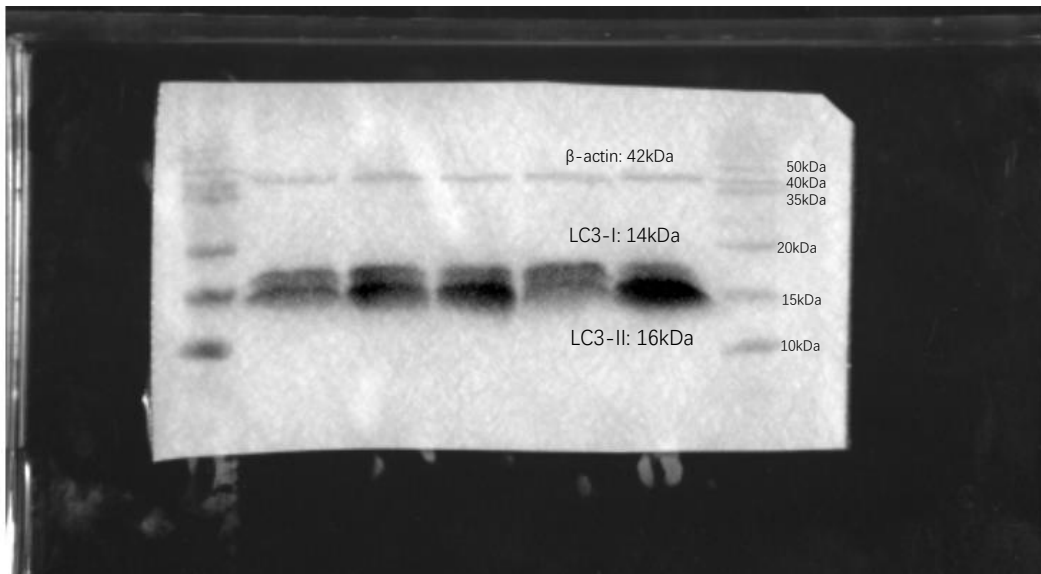

## 5.(repeat)

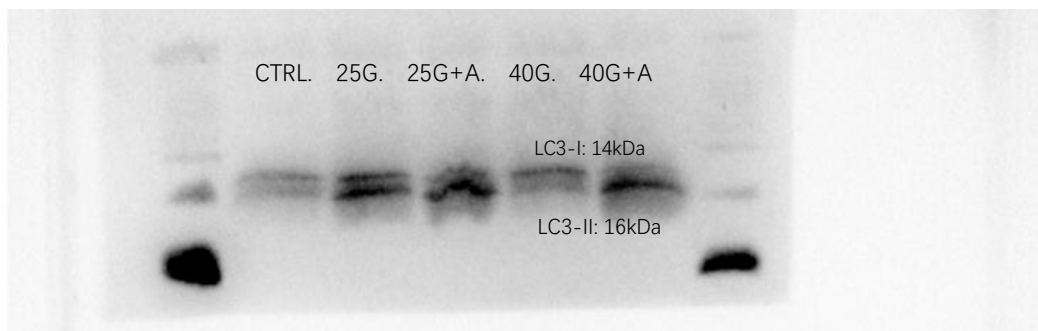

## 6. (repeat)

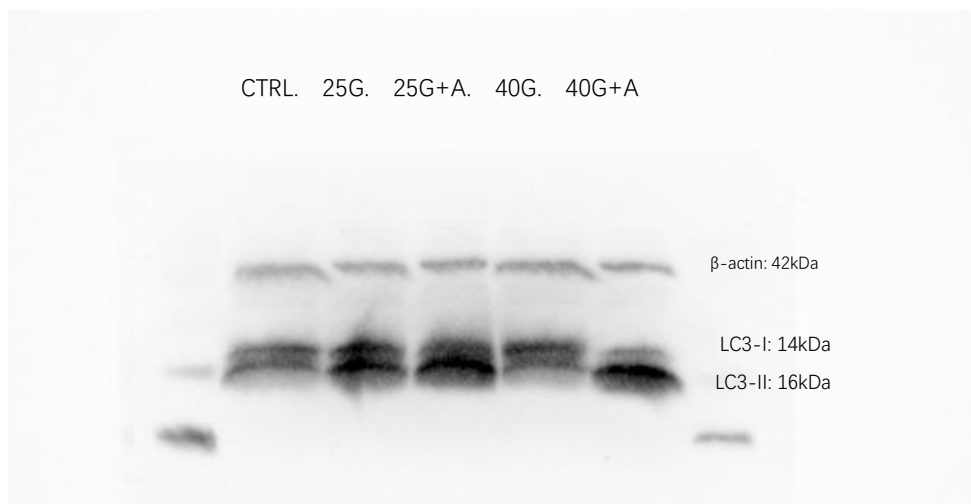

Merge

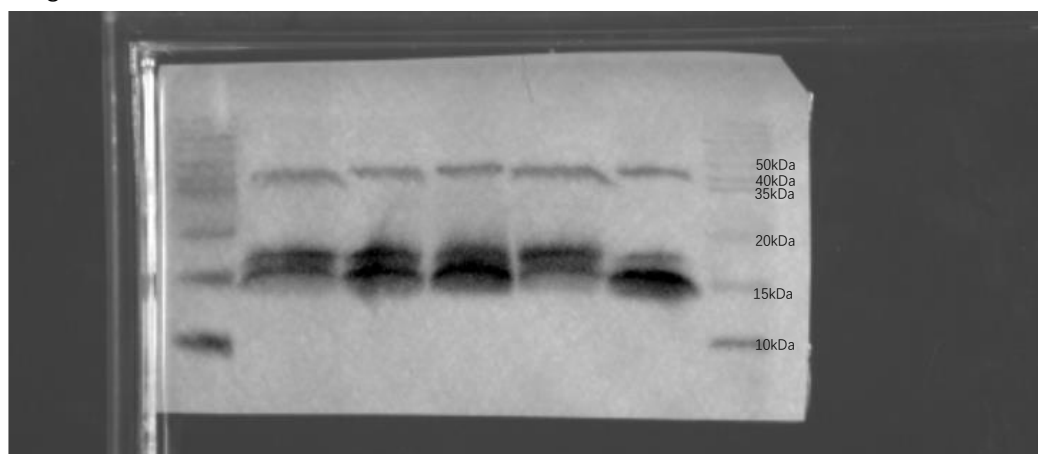



# 5.P62

1.

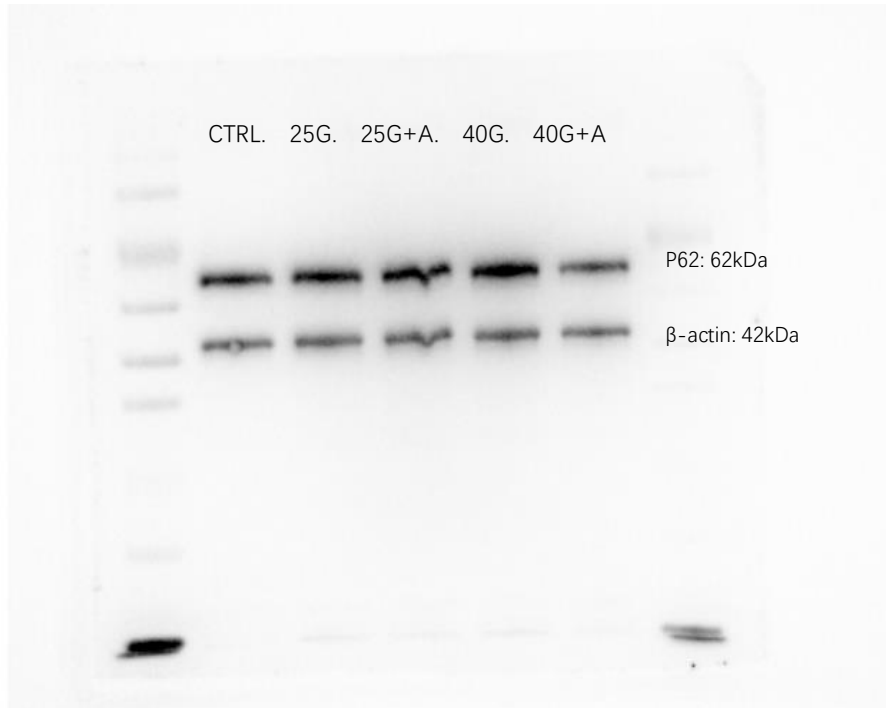

Merge

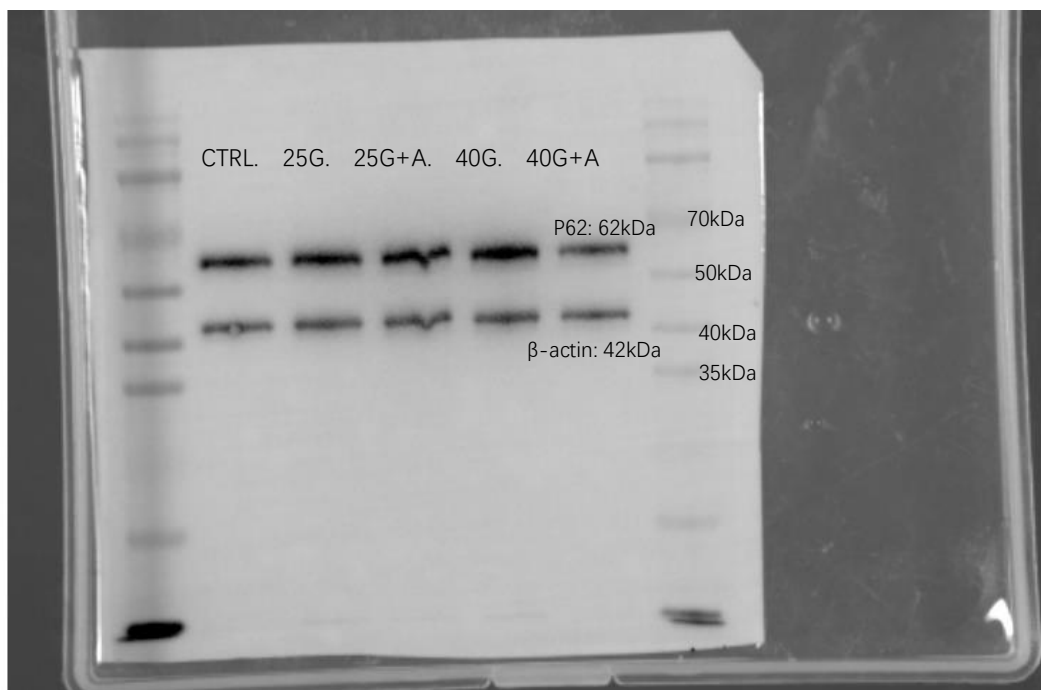

## 2.(repeat)

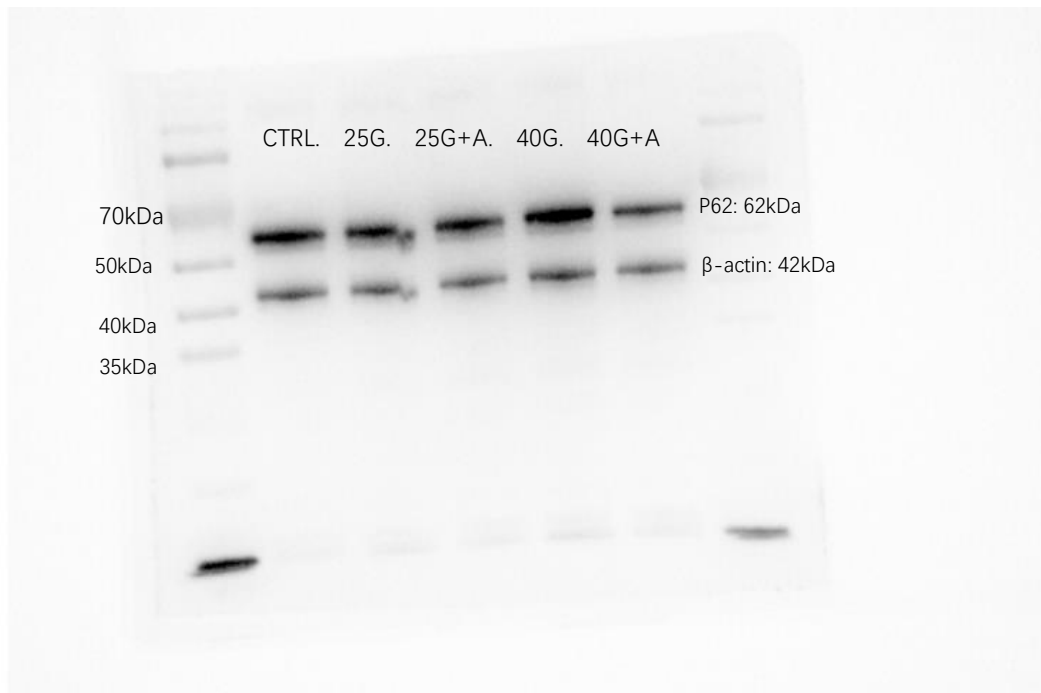

## Merge

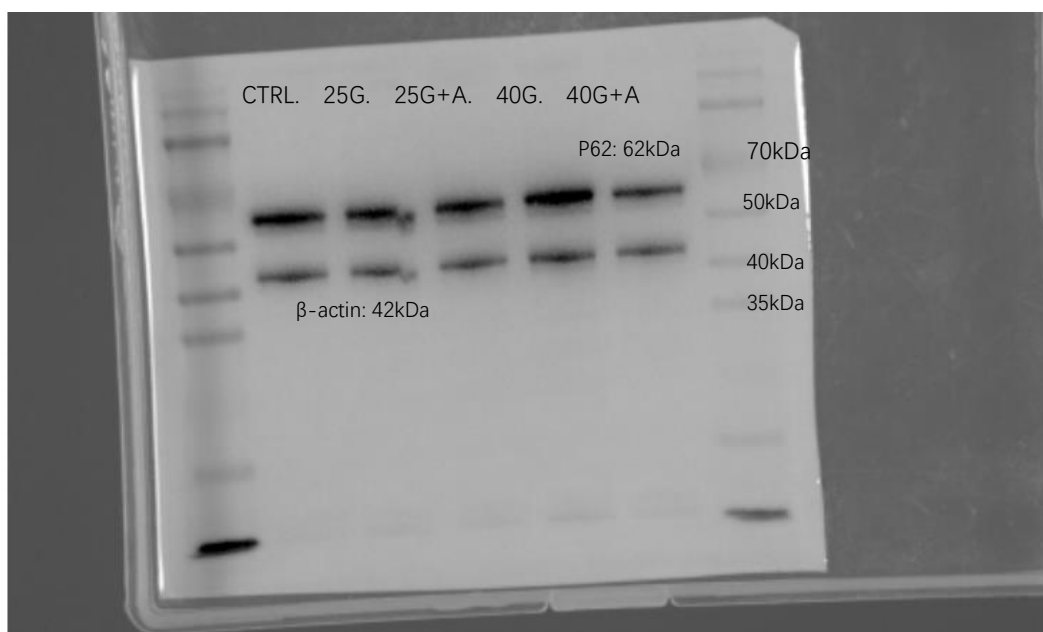

3.

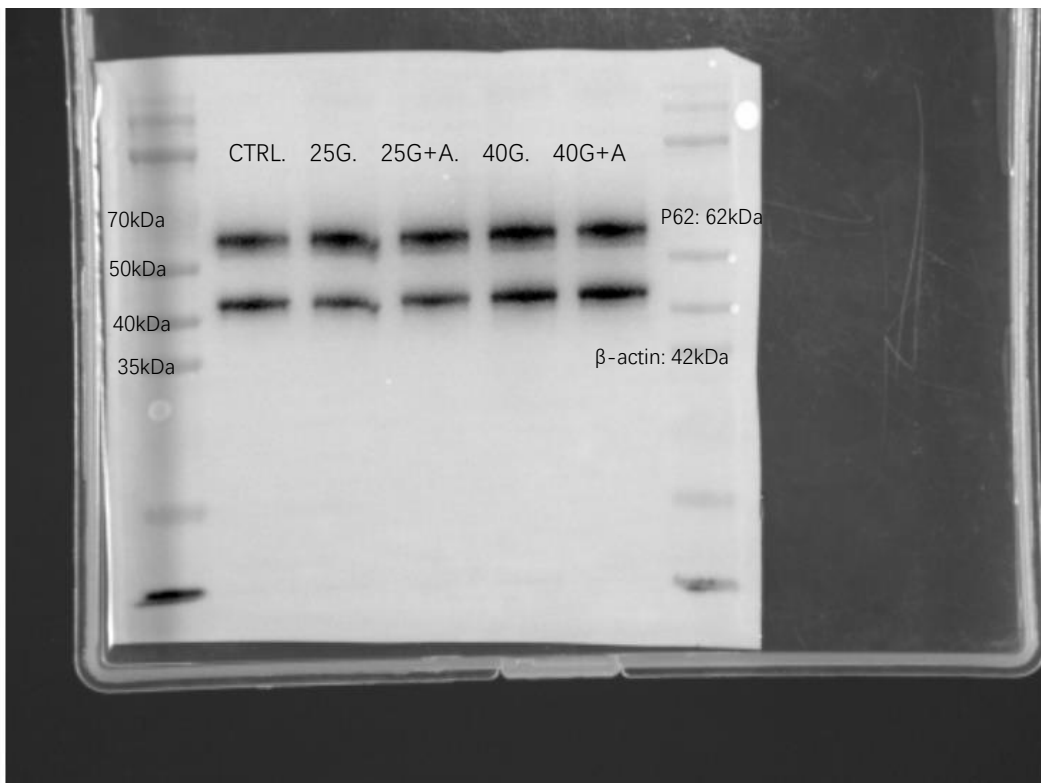

Supplement: WB-origin-figure.pdf [file WB-origin-figure.pdf]
