# Supplementary figures and images for: ANXA2 promotes osteogenic differentiation and inhibits cellular senescence of periodontal ligament cells (PDLCs) in high glucose conditions
Source: PeerJ journal article supplement (doi:10.7717/peerj.18064), 2024-09-18

CTRL

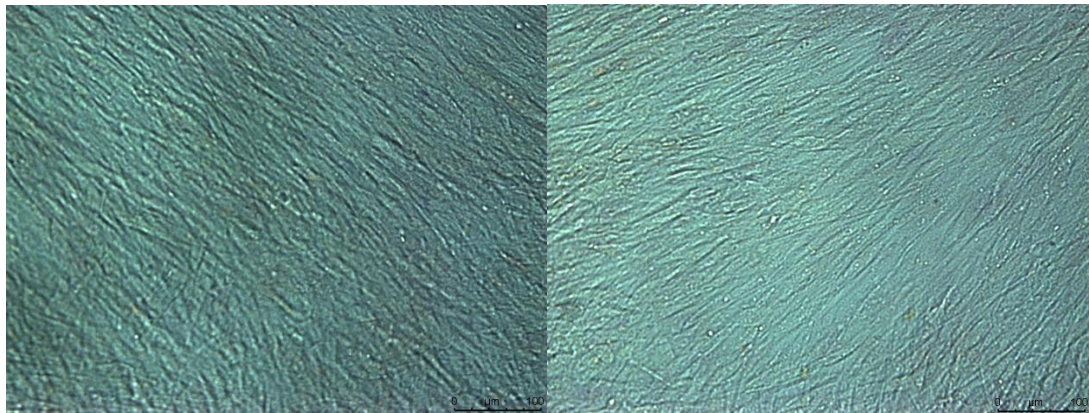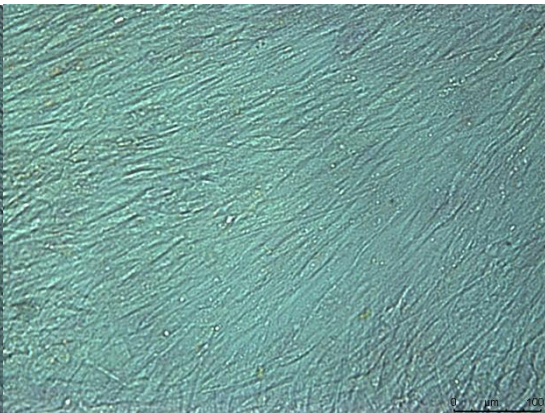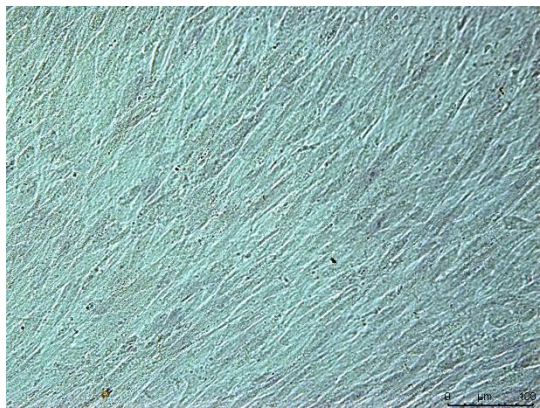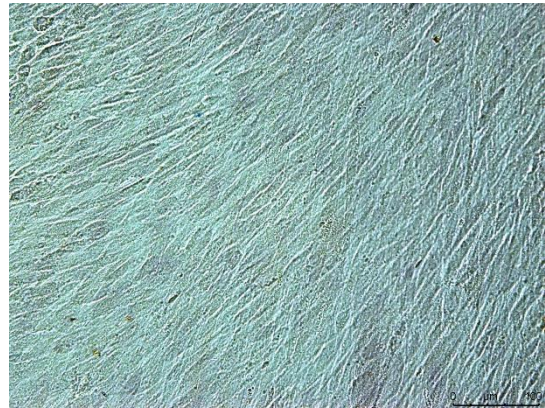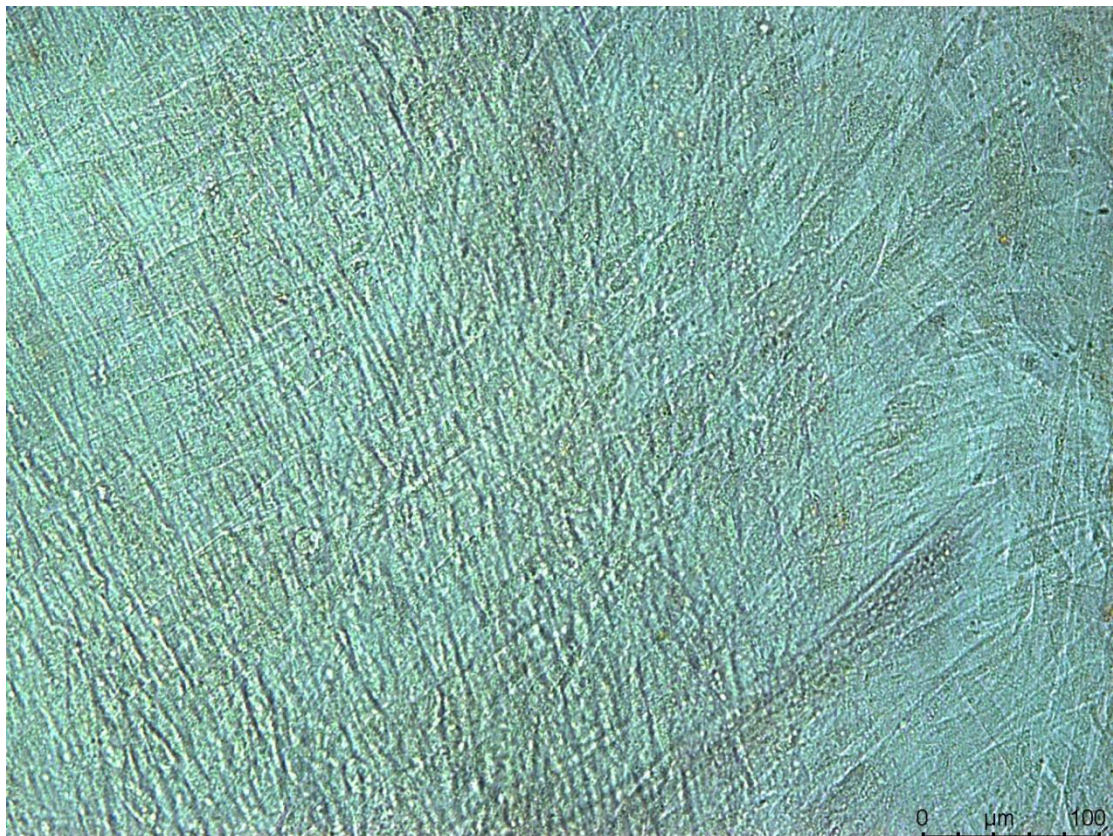

ODM

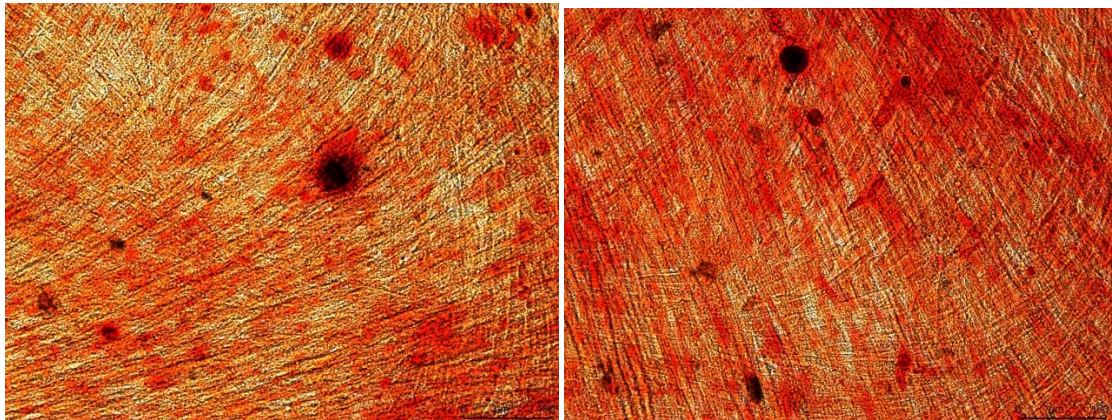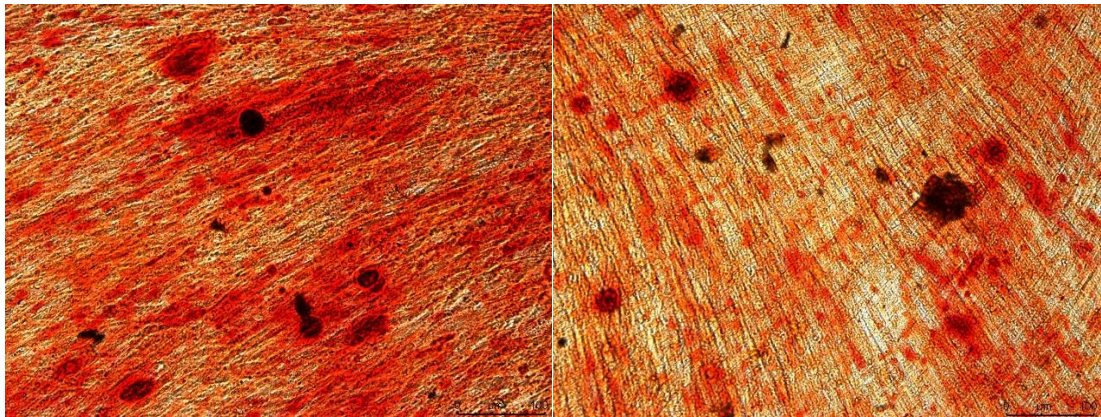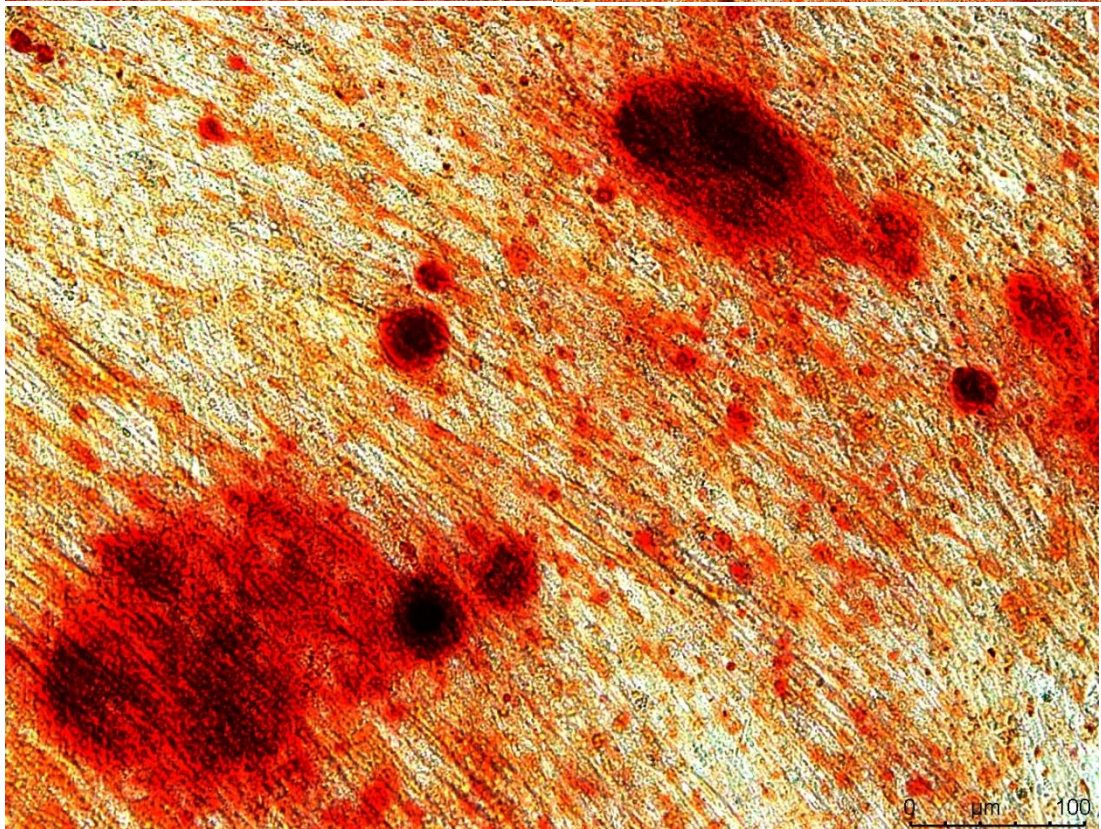

10G

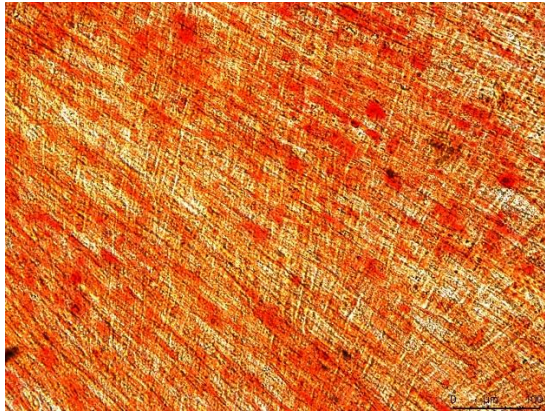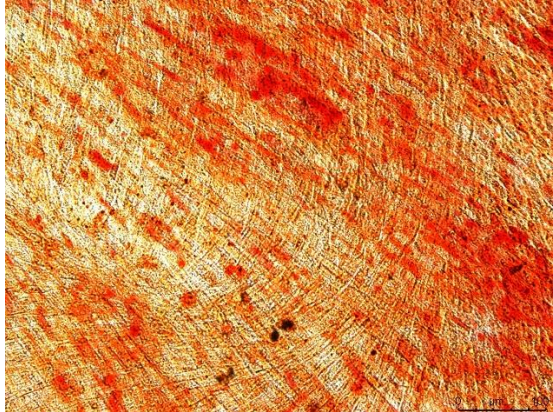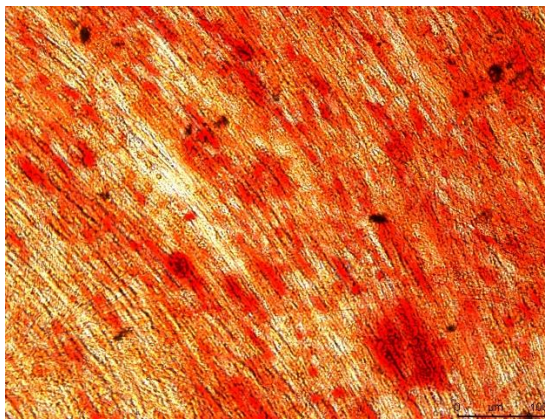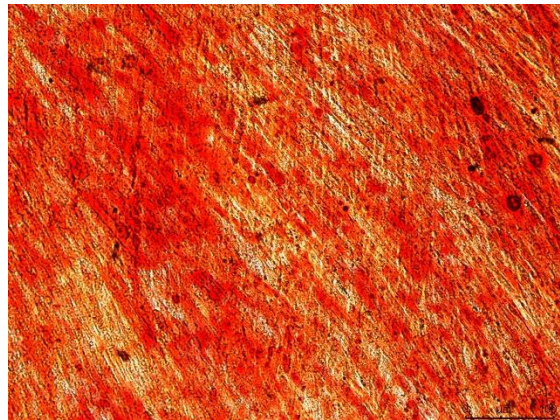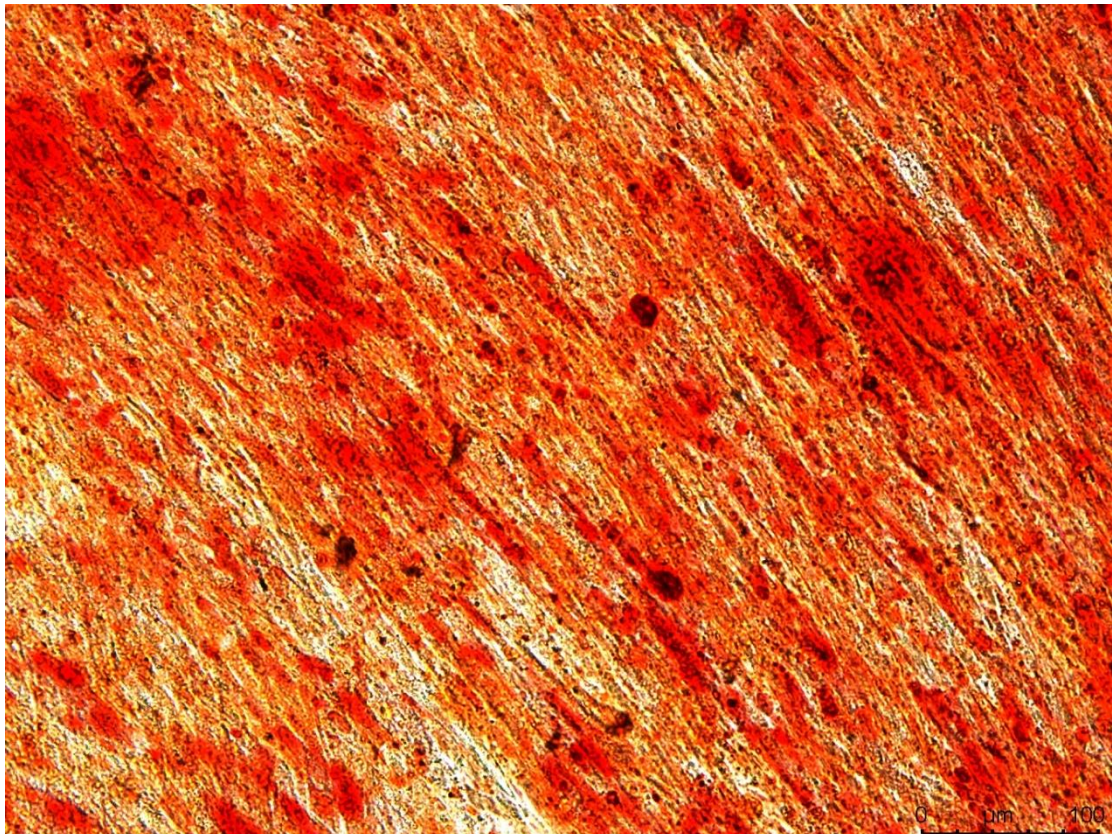

25G

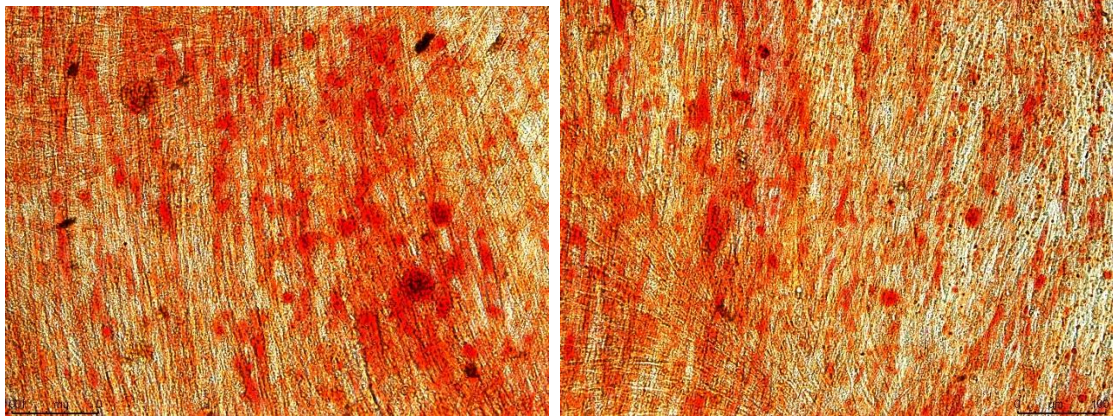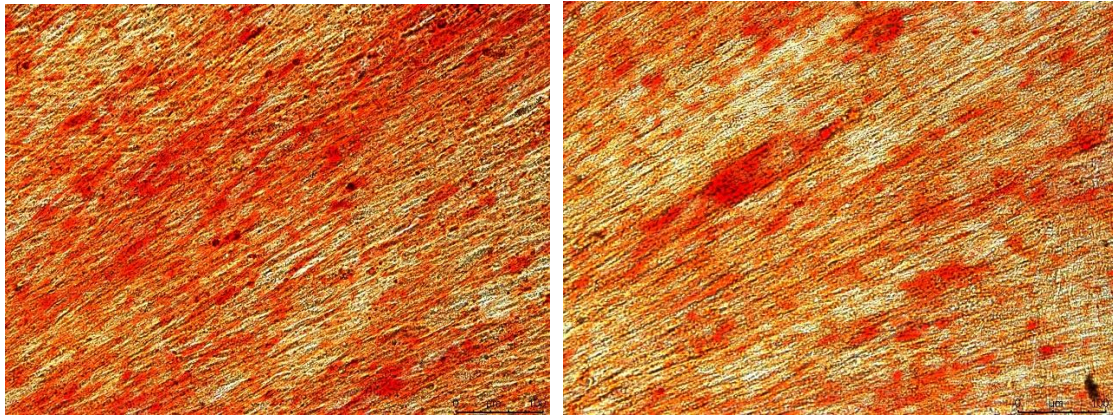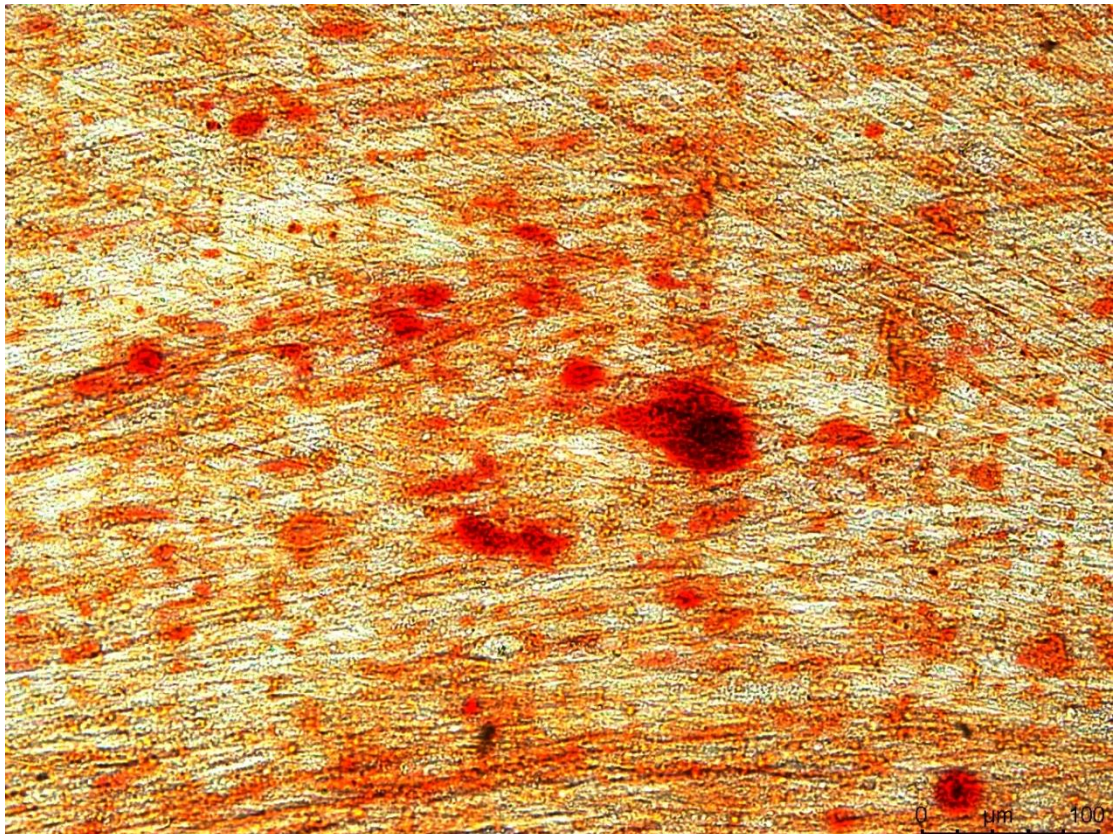

25G+A

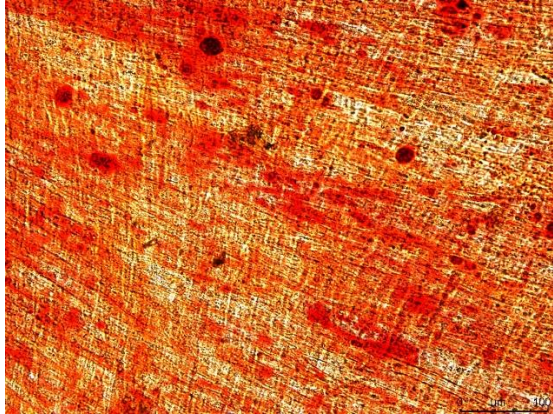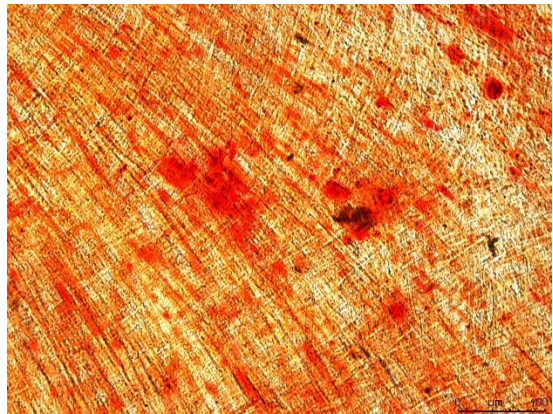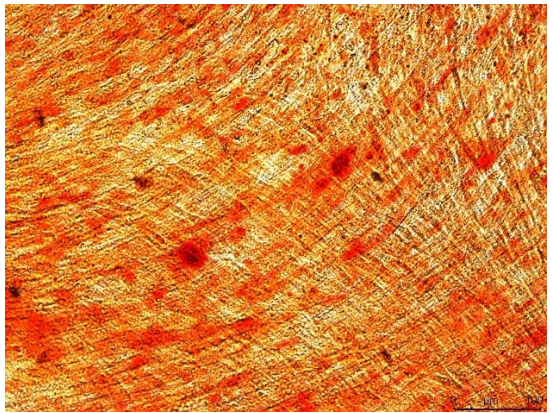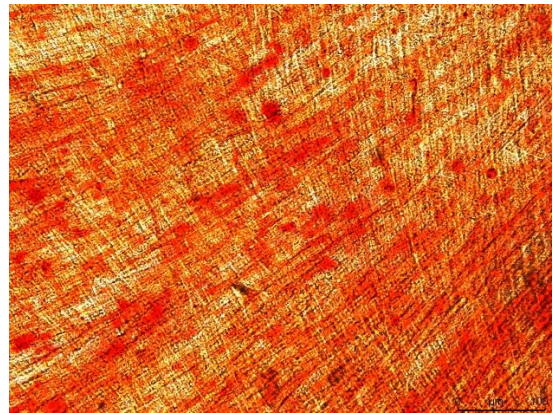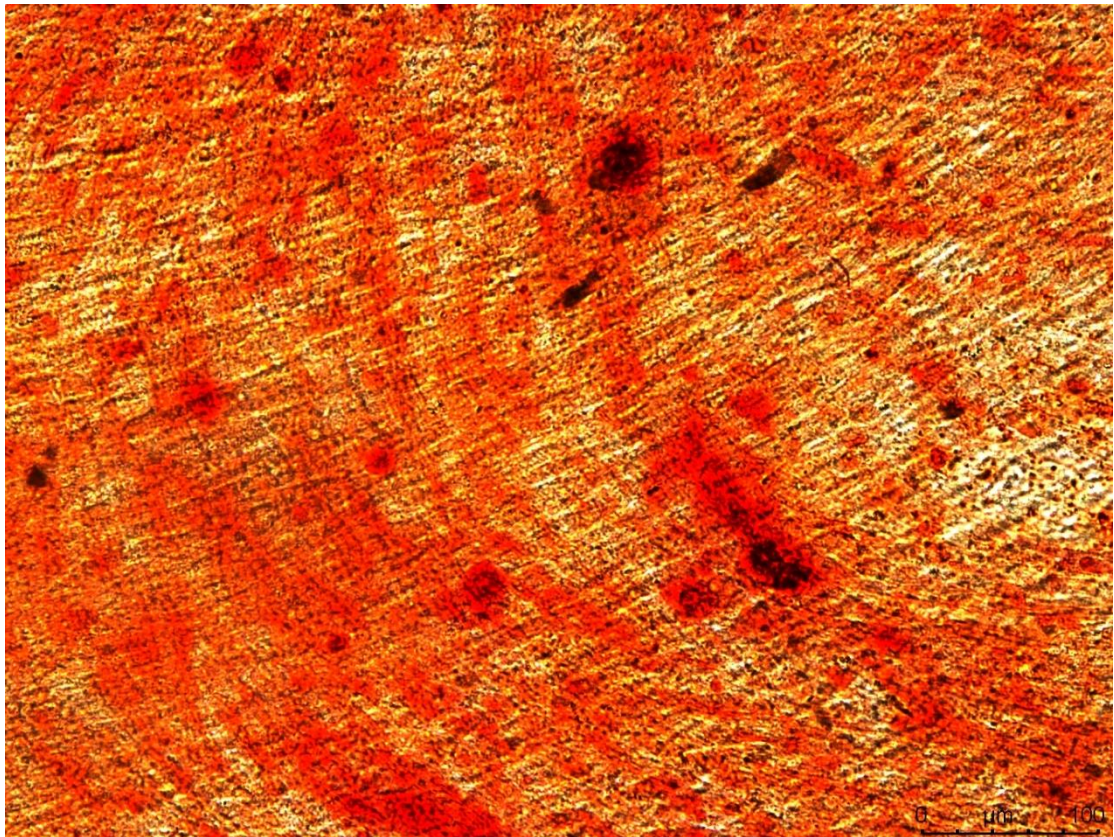

40G

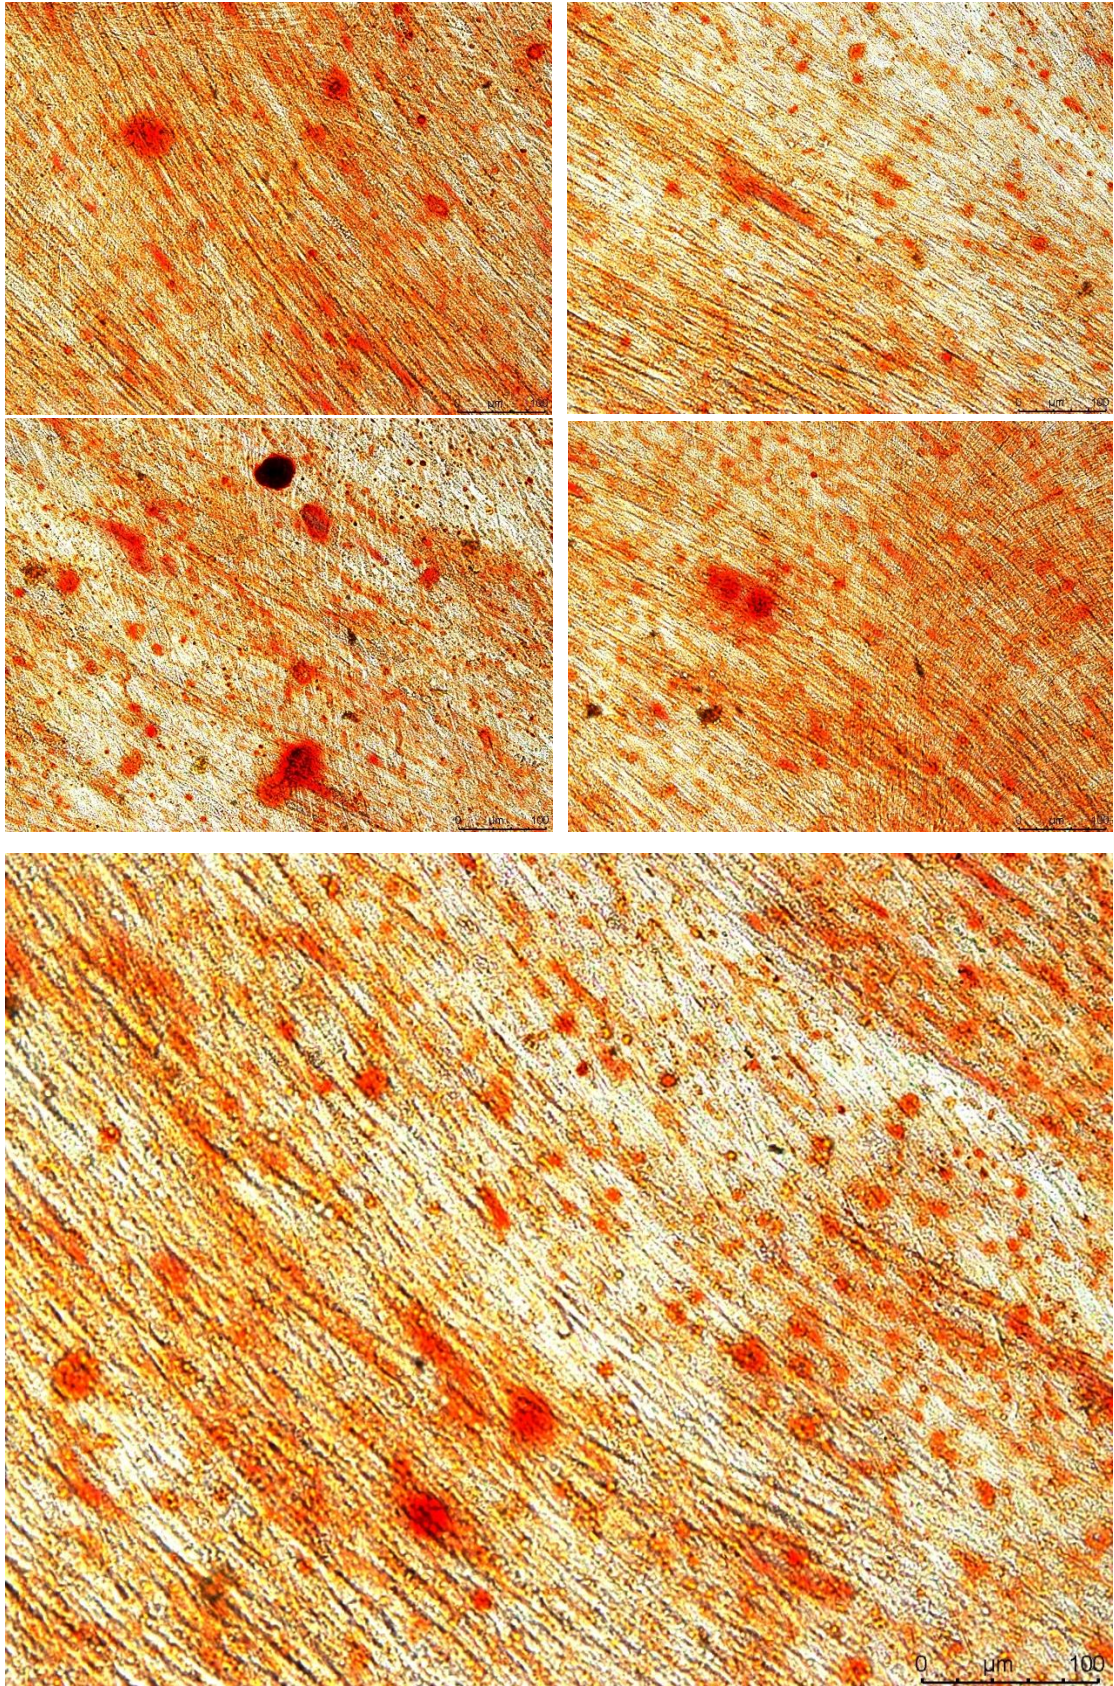

40G+A

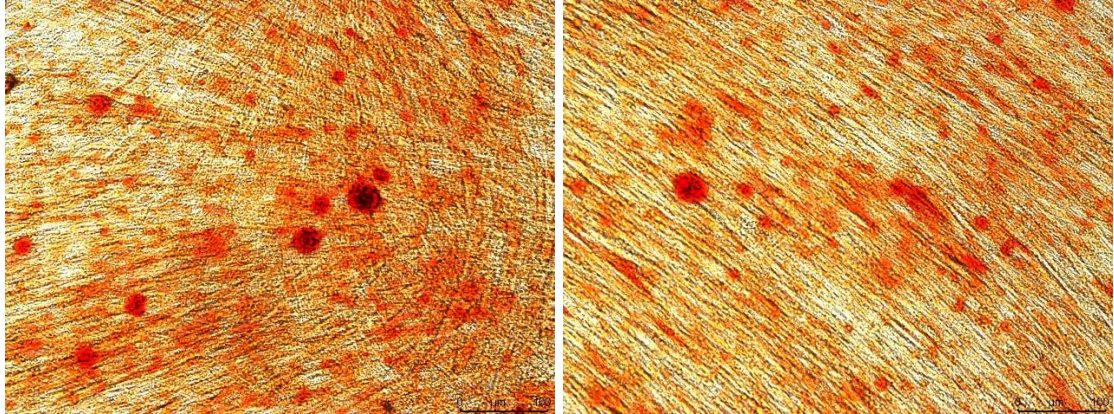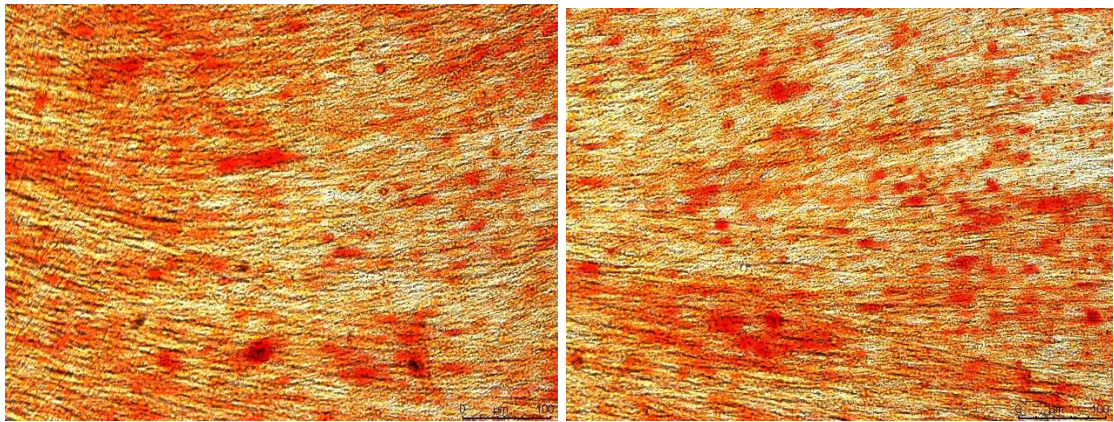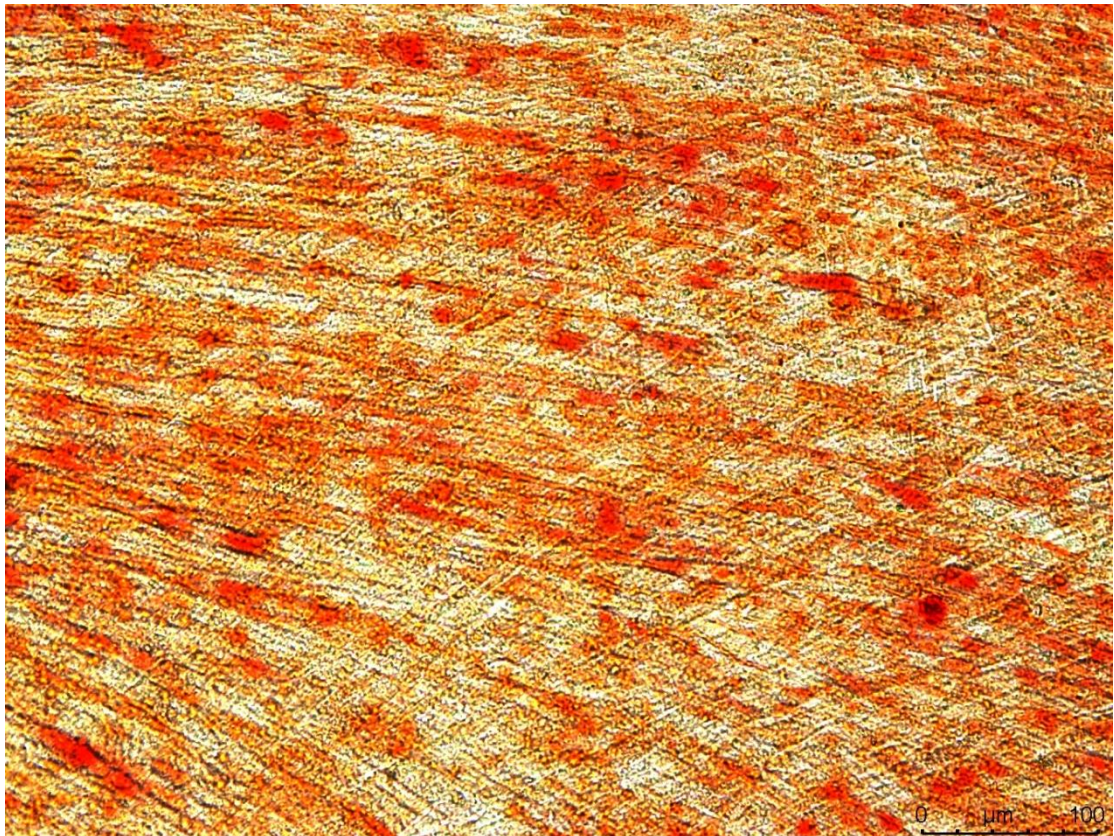

# Merge

CTRL

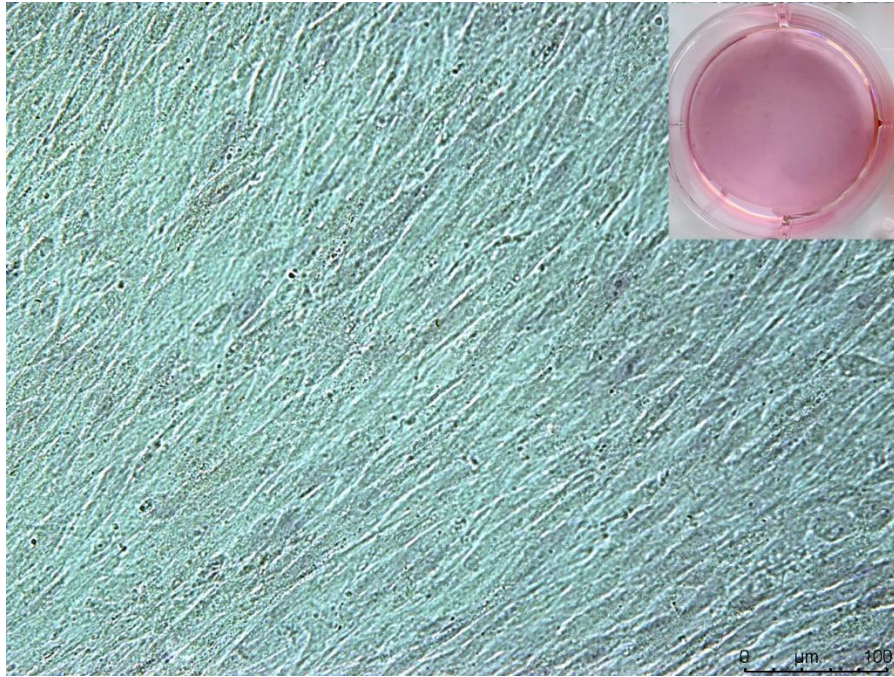

ODM

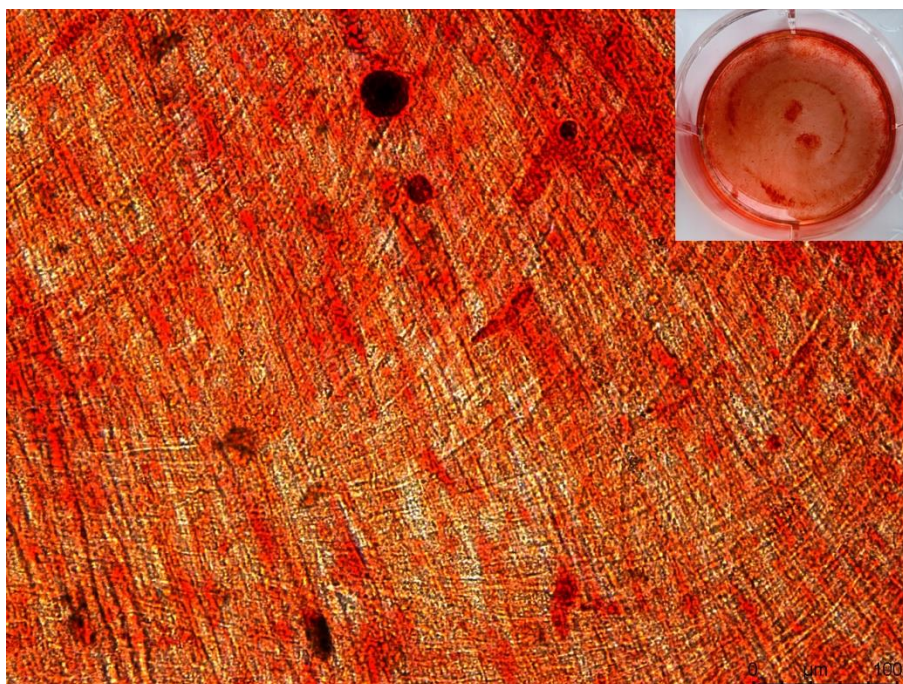



10G

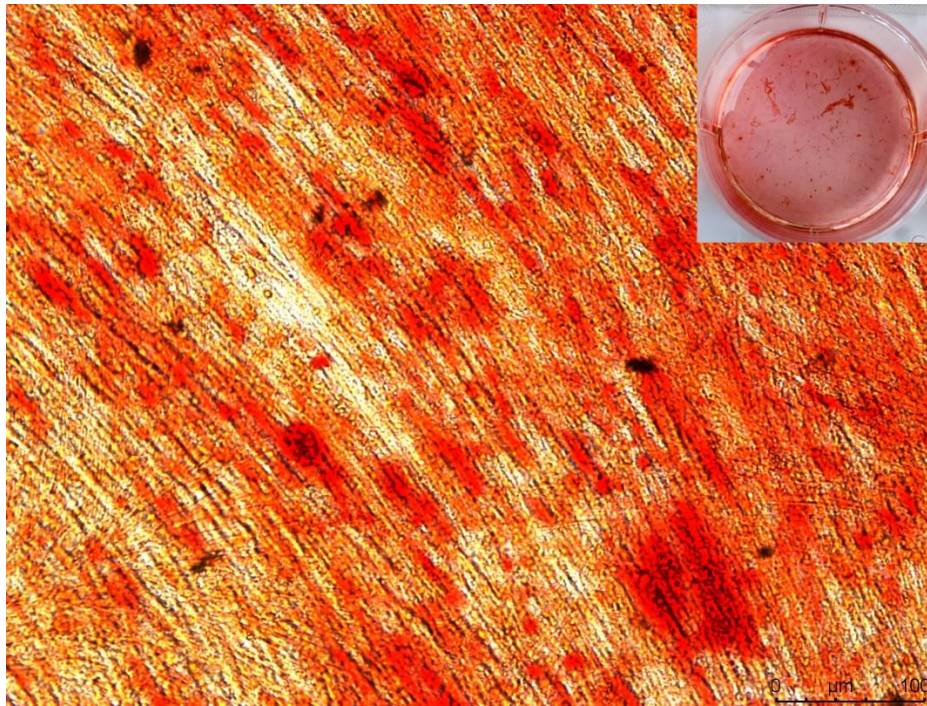

25G

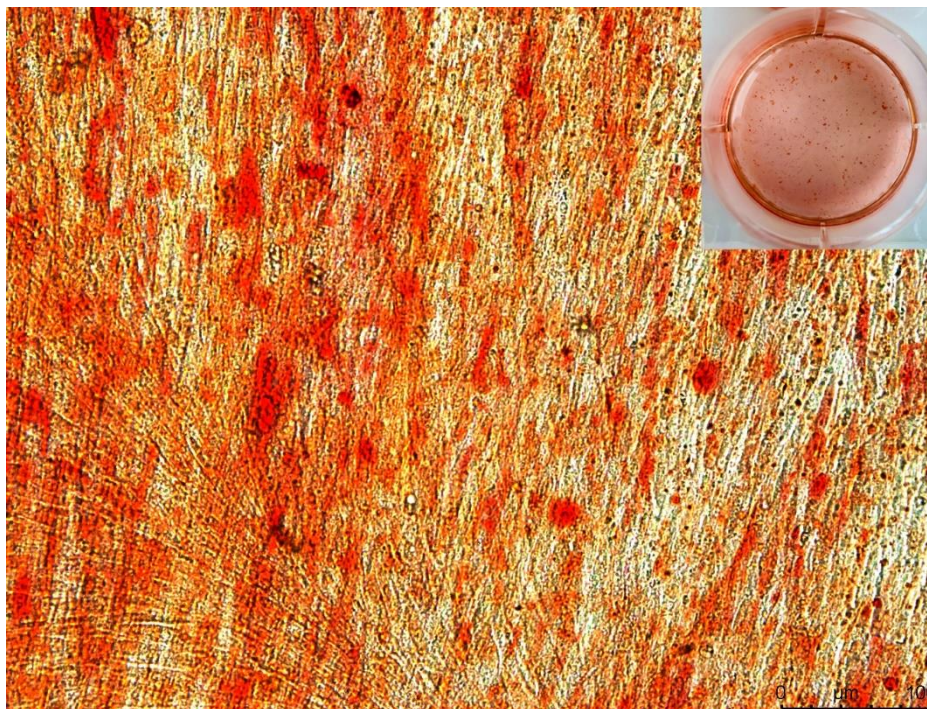

25G+A

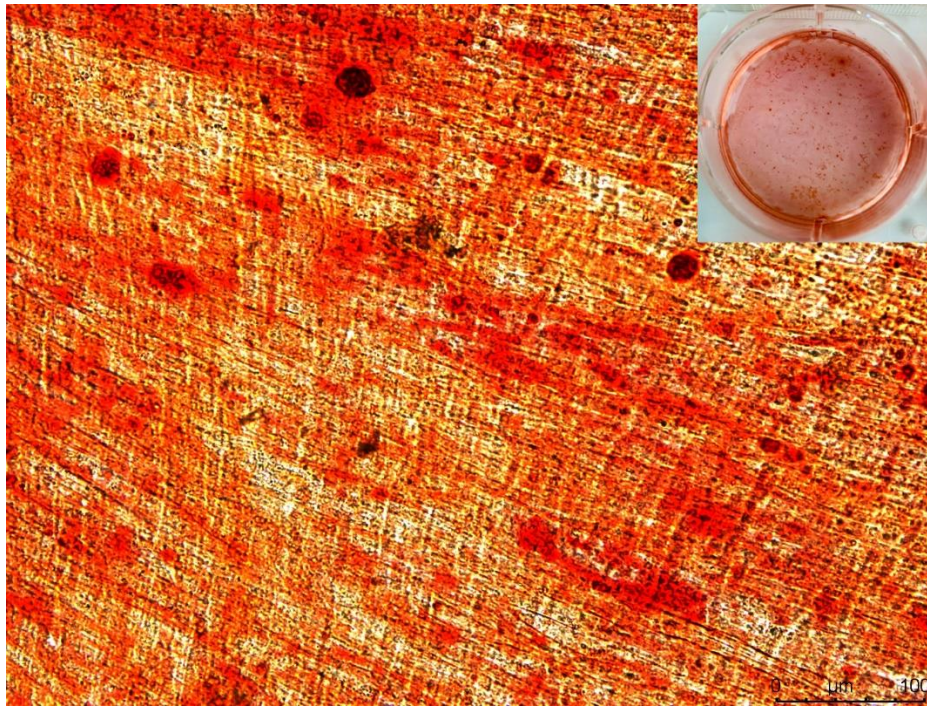

40G

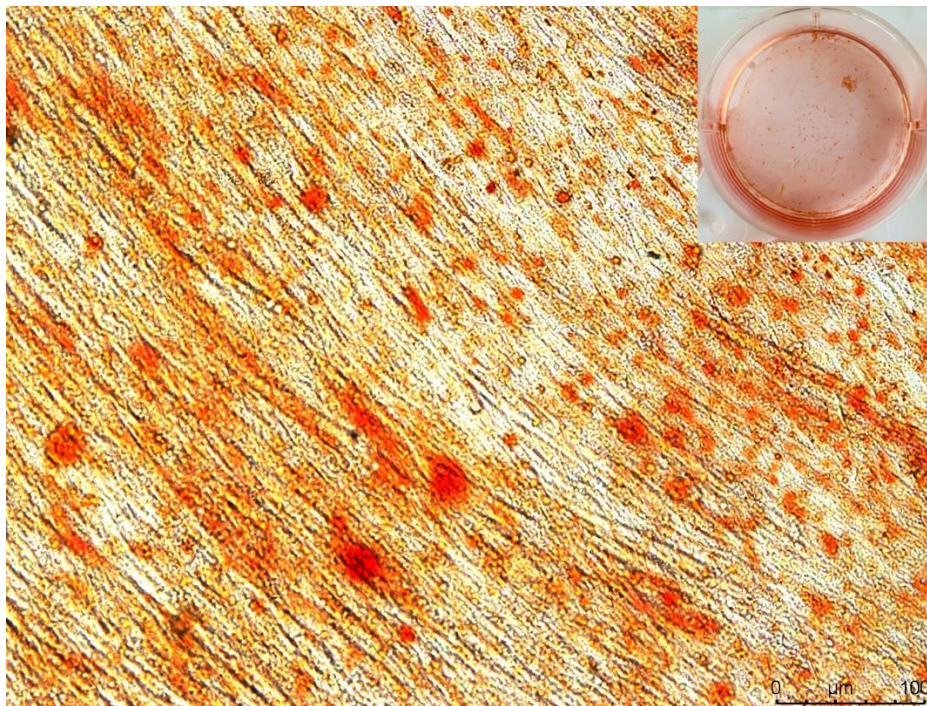

40G+A

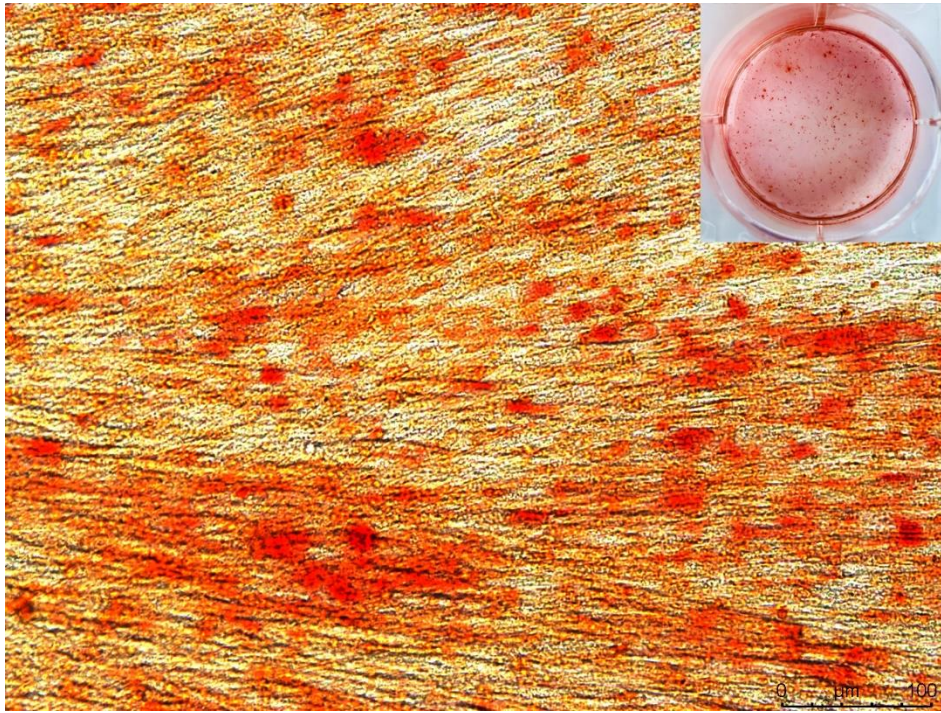

Supplement: ARS-images.pdf [file ARS-images.pdf]

CTRL

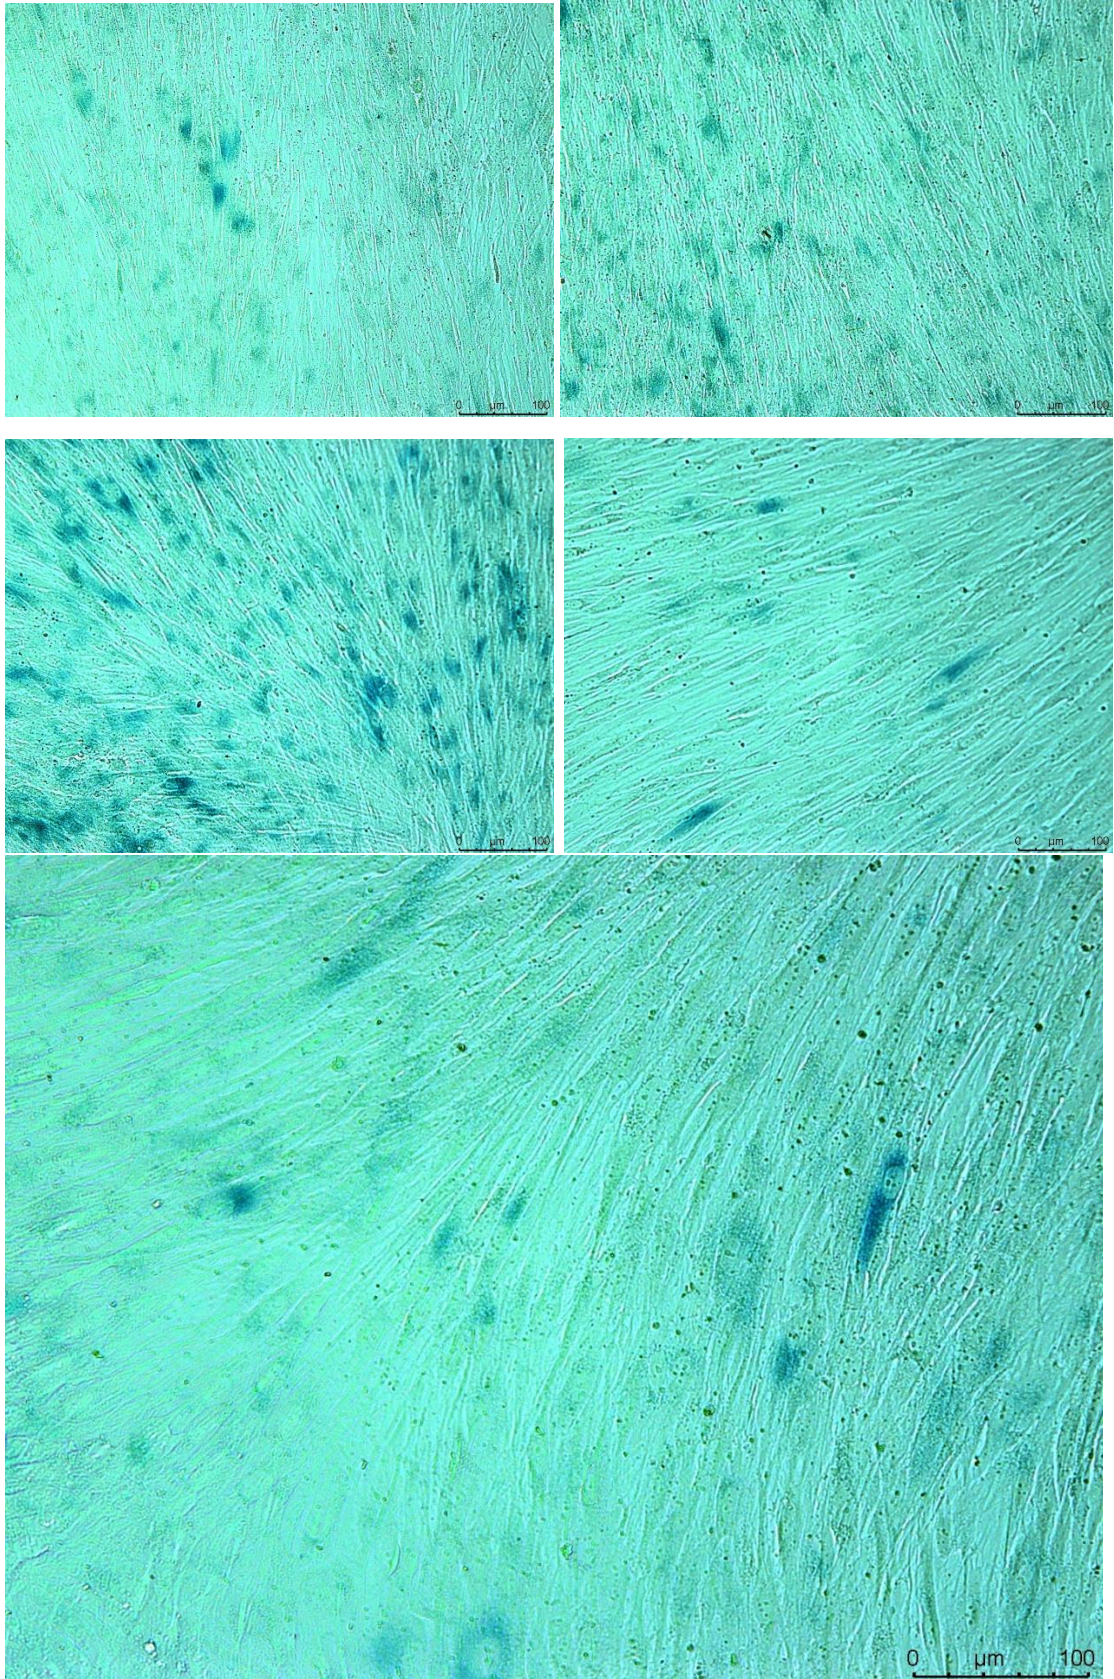



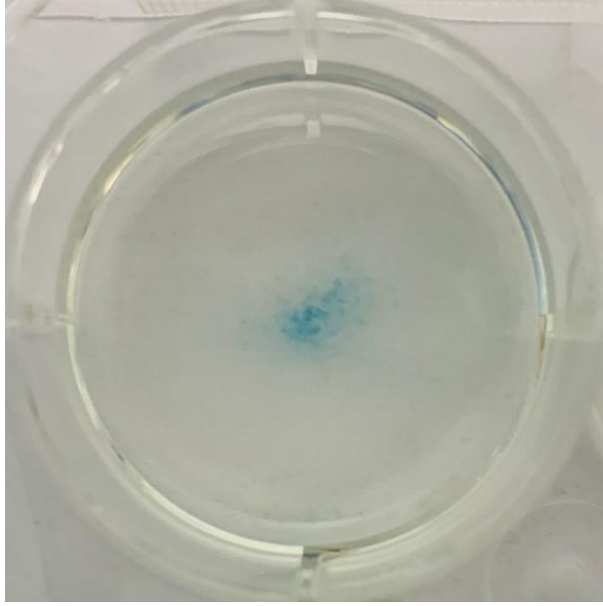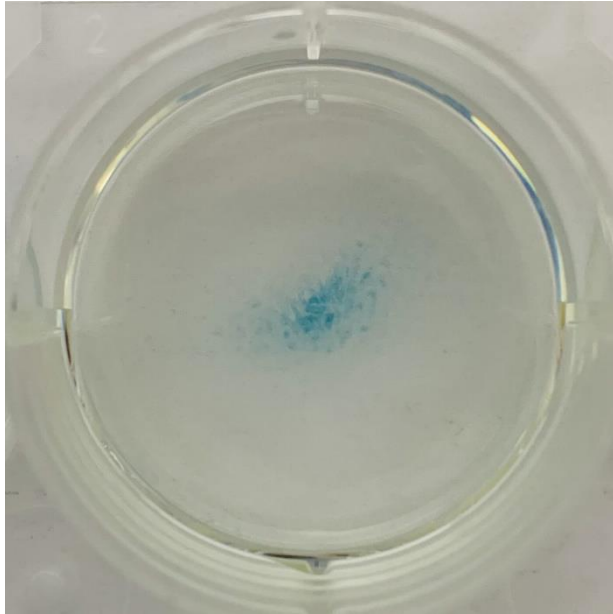



8G

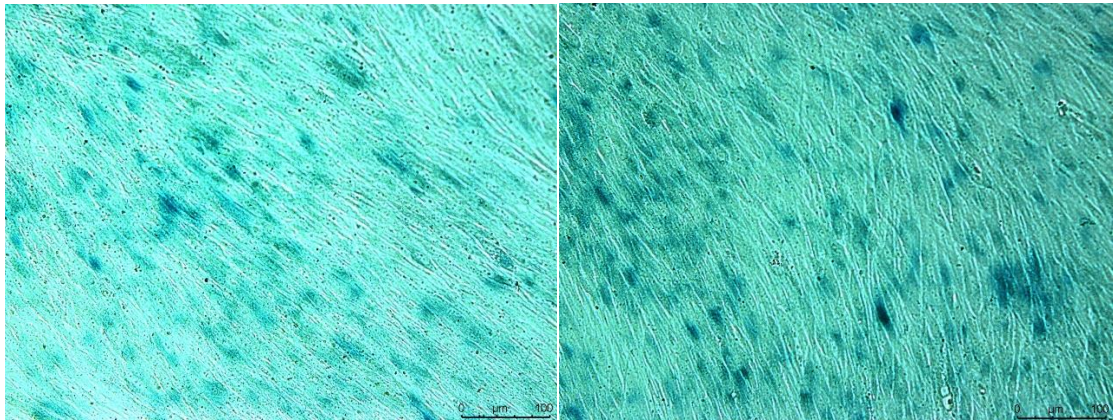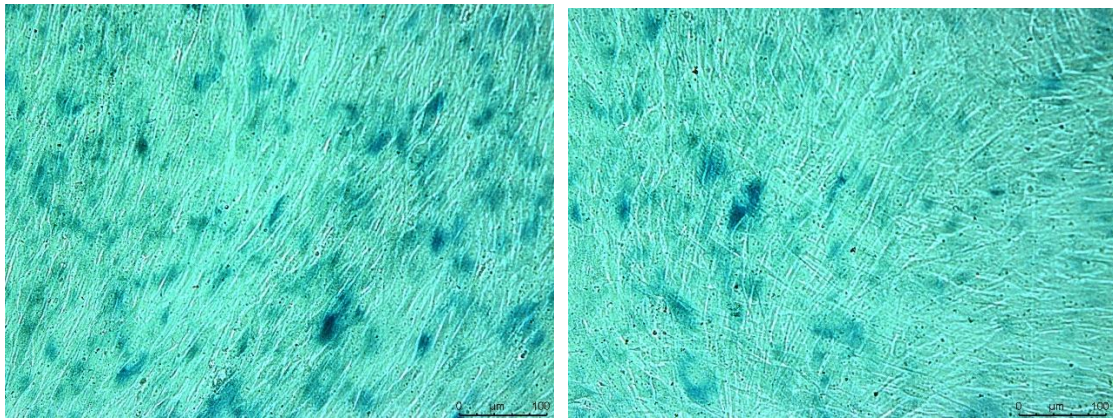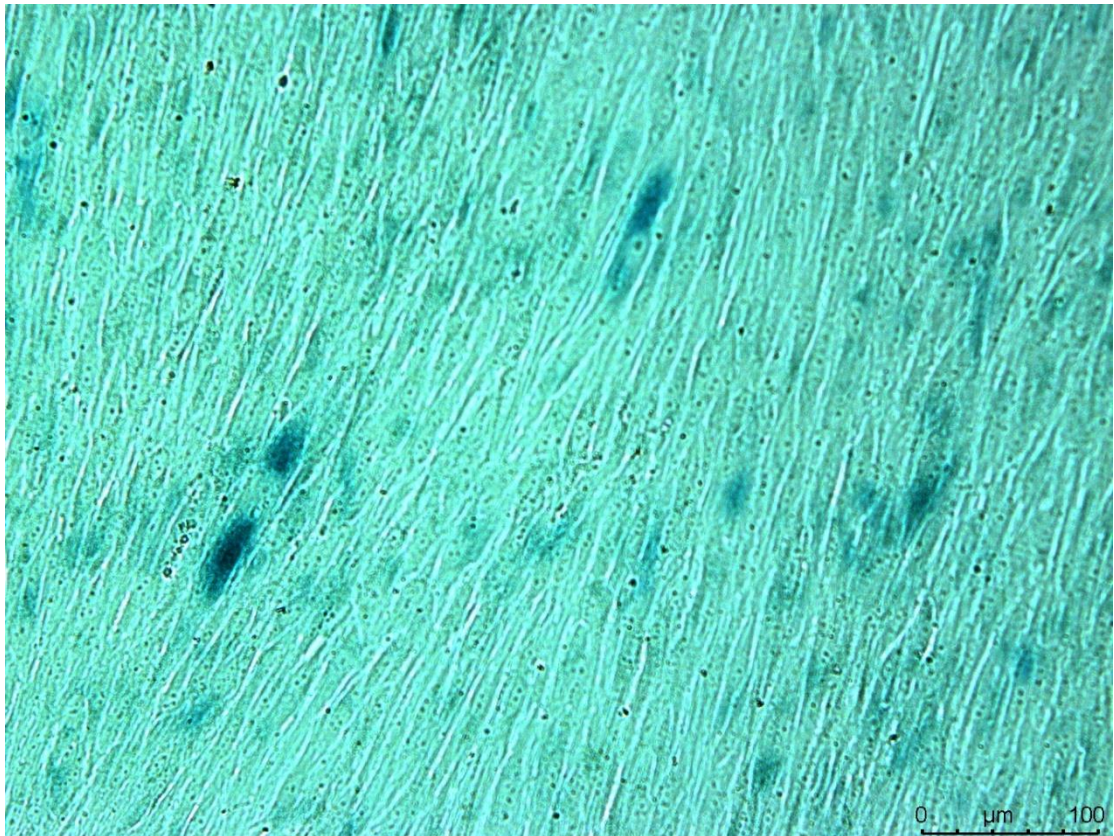



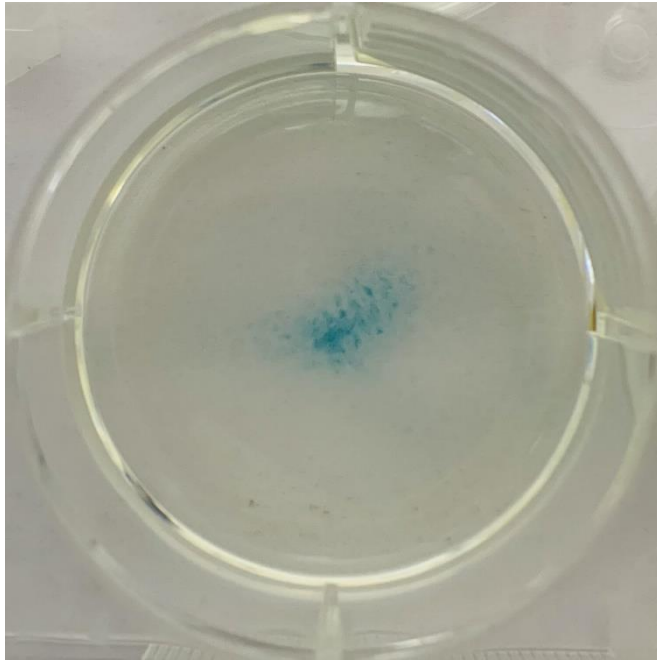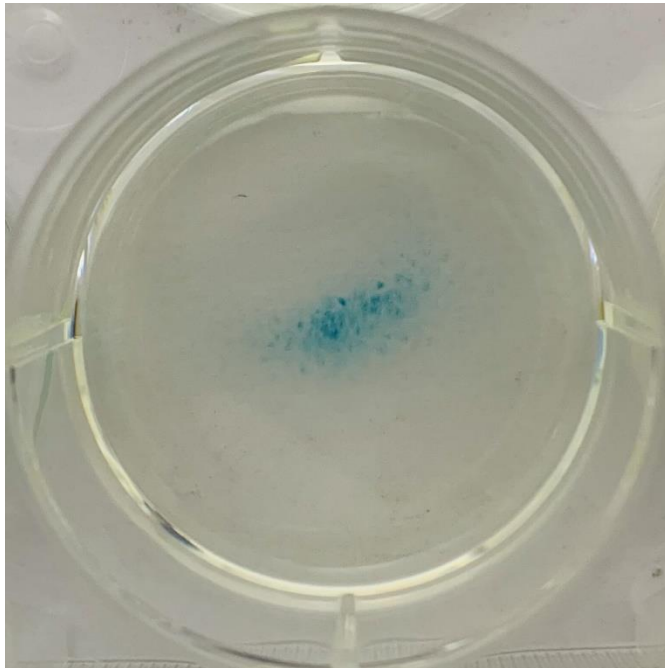



10G

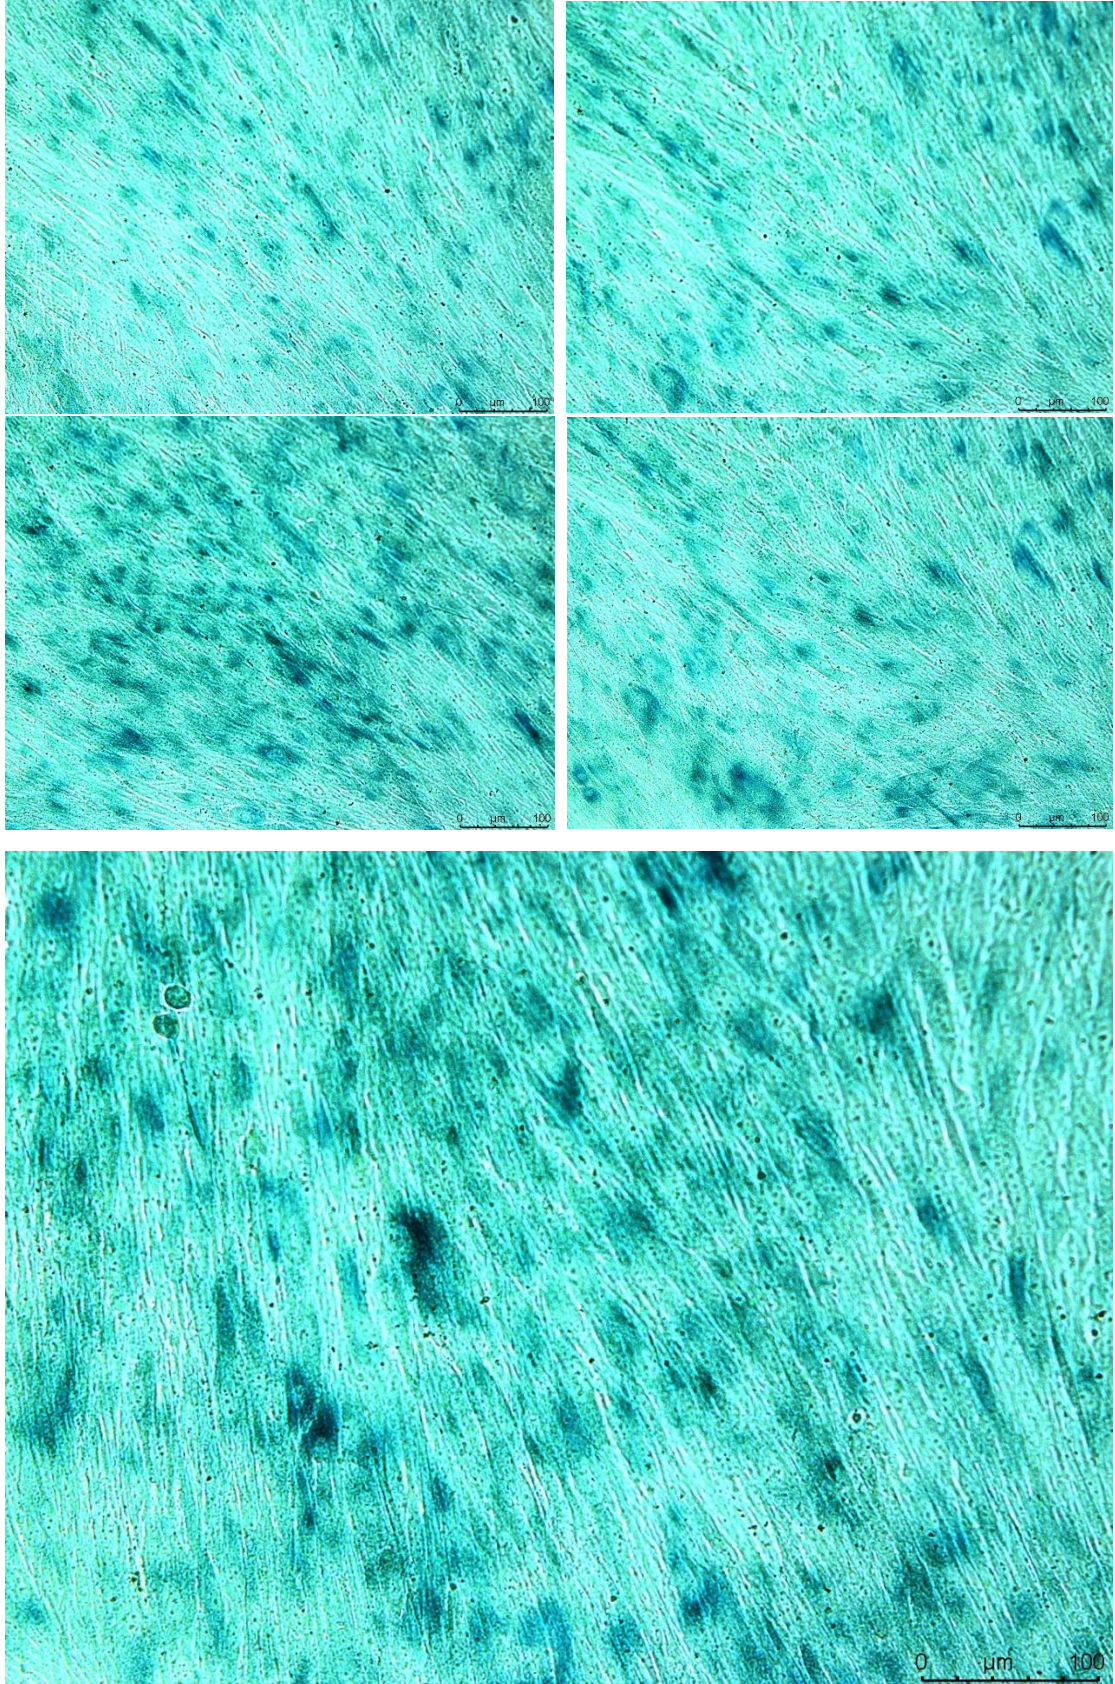



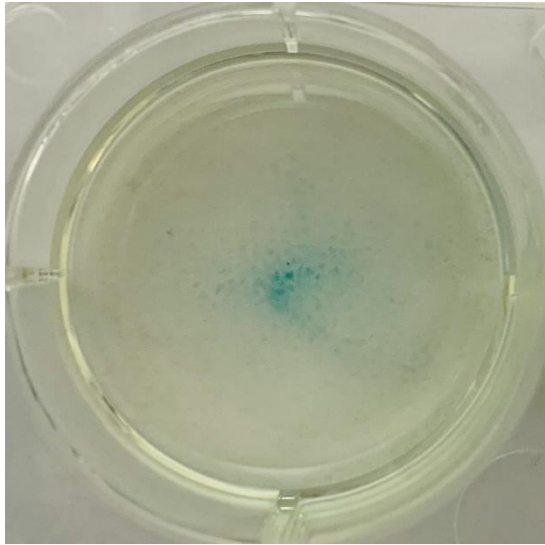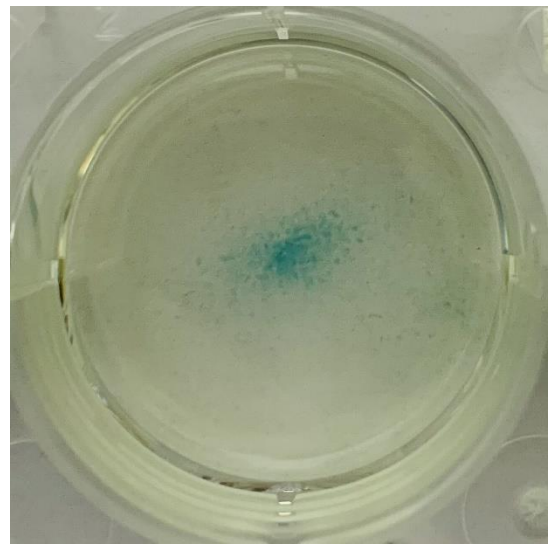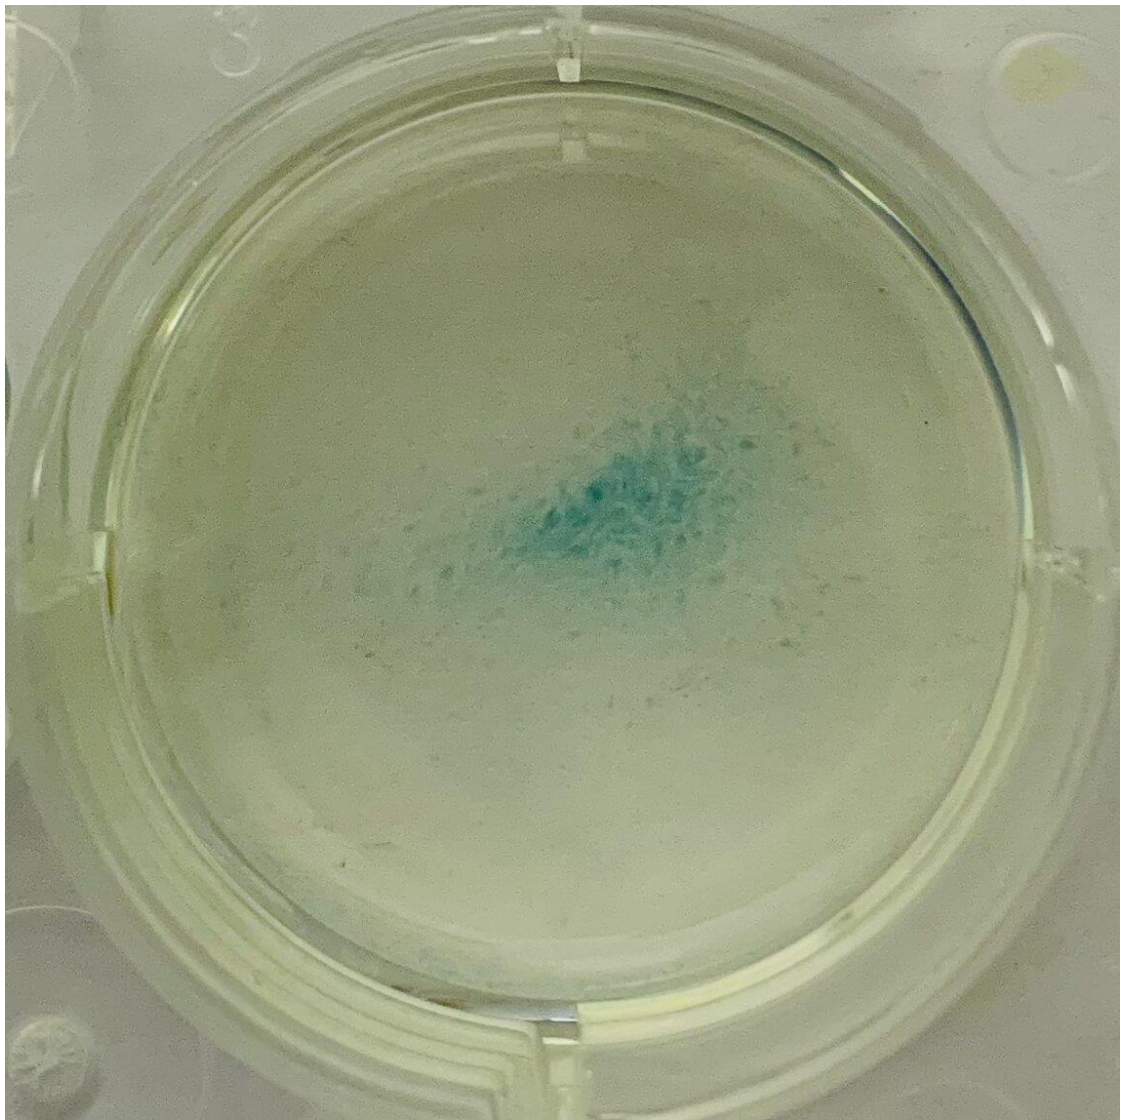



25G

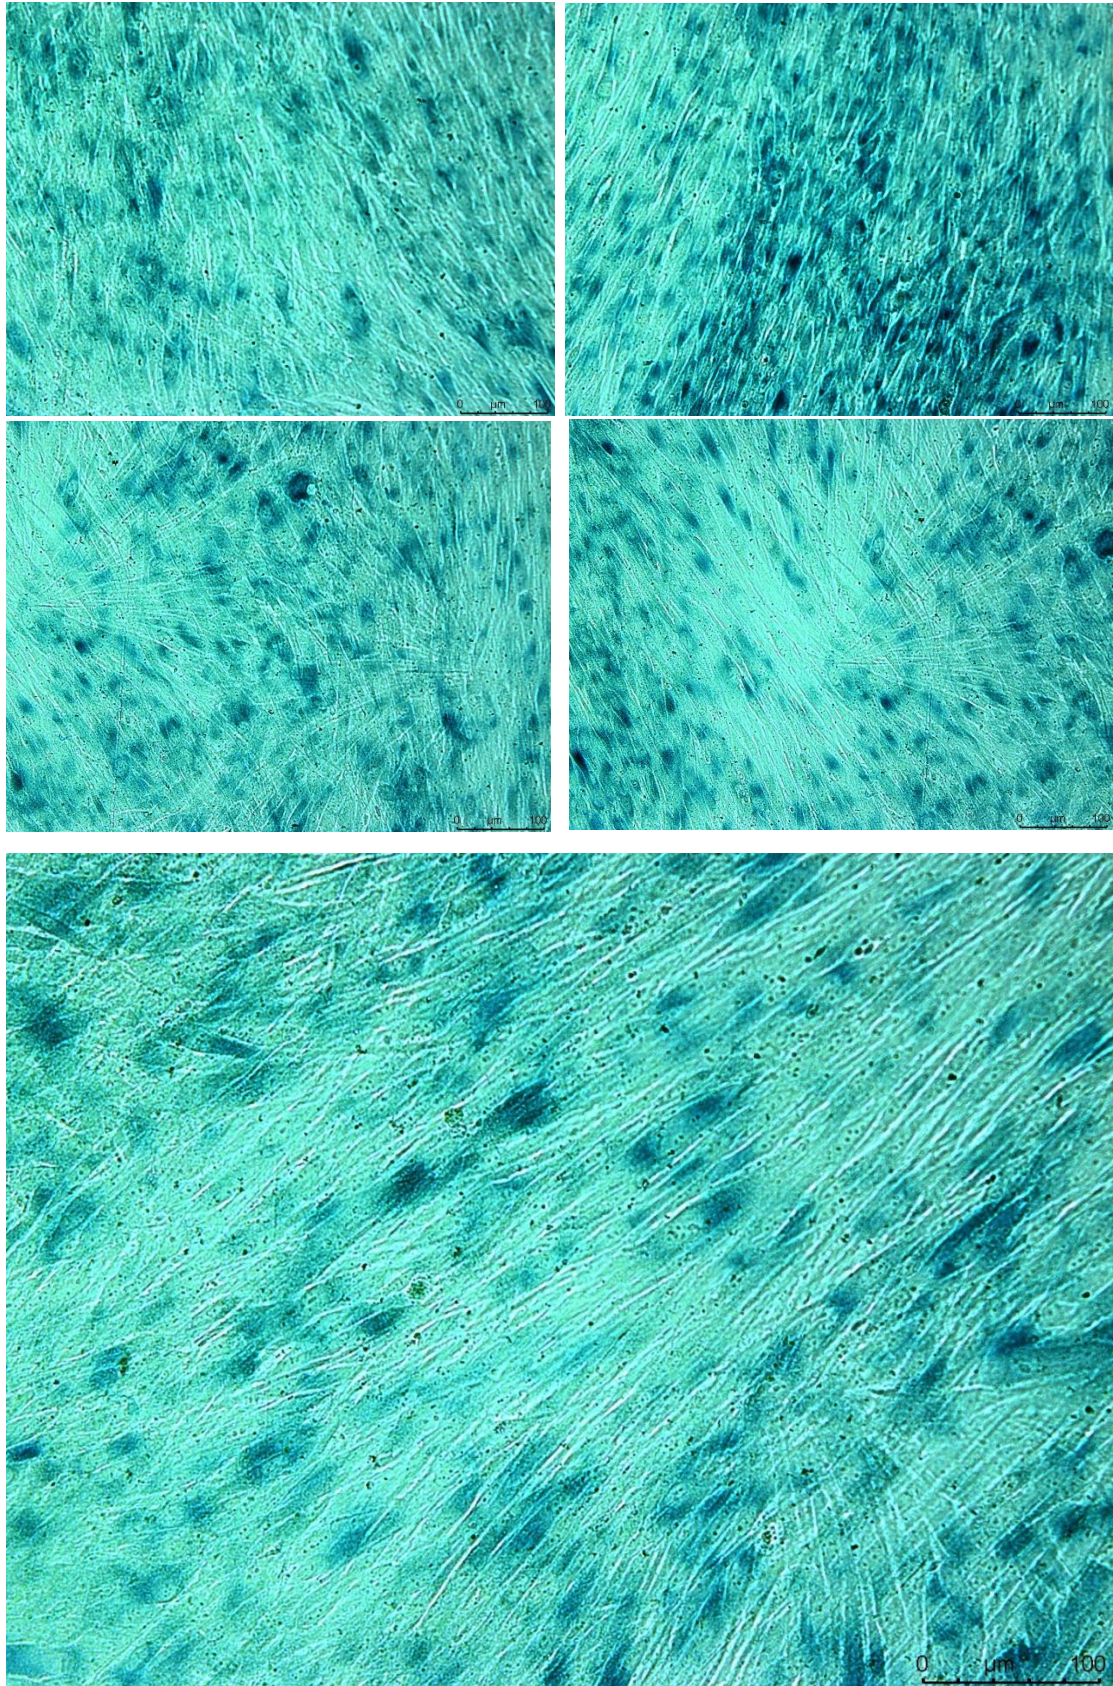



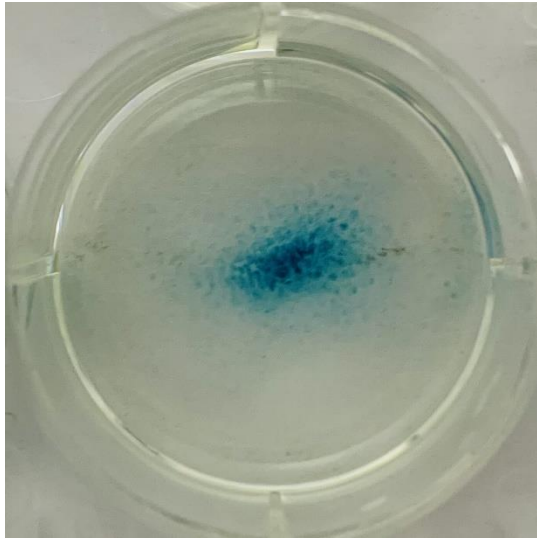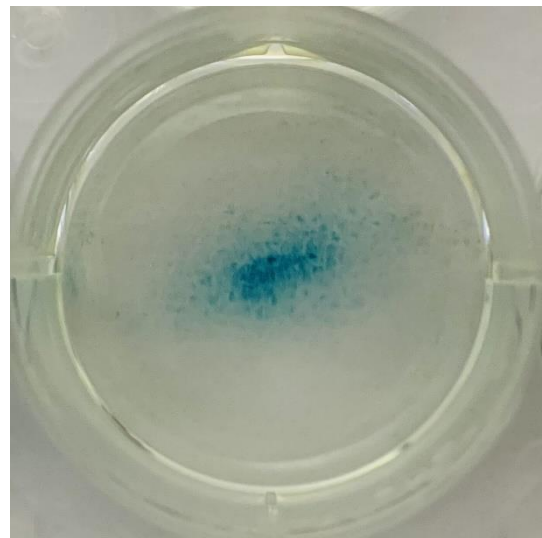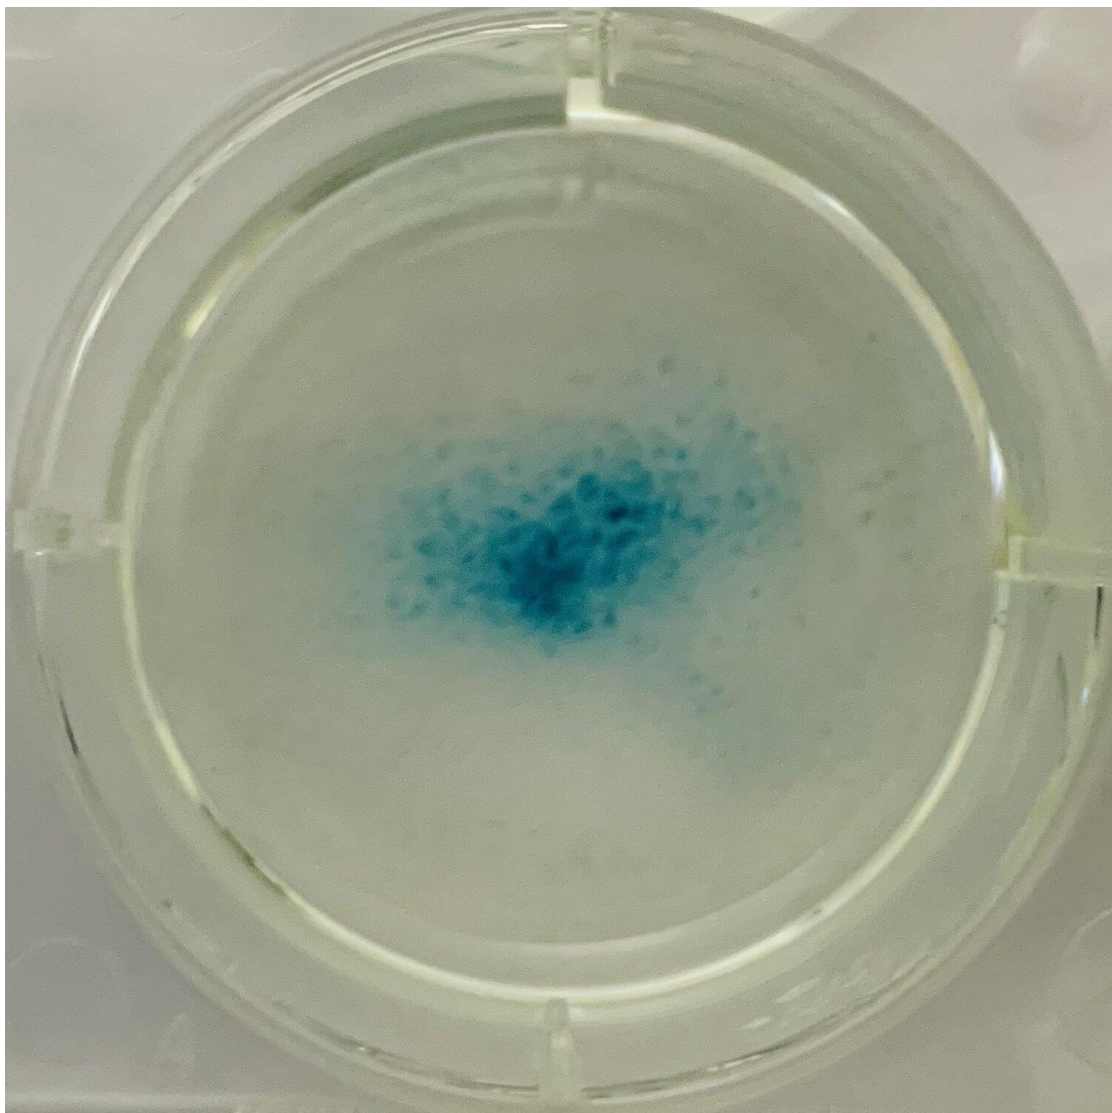



25G+A

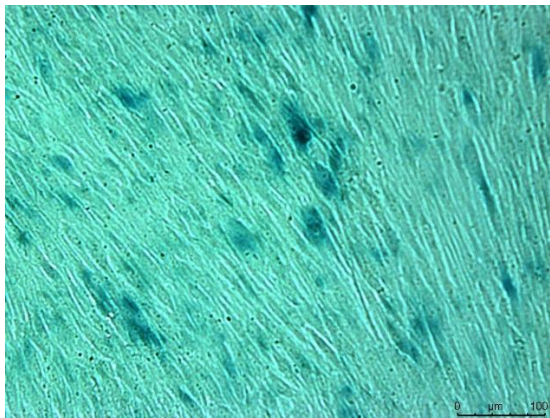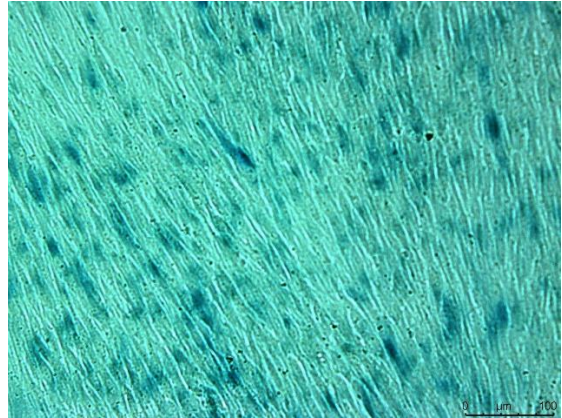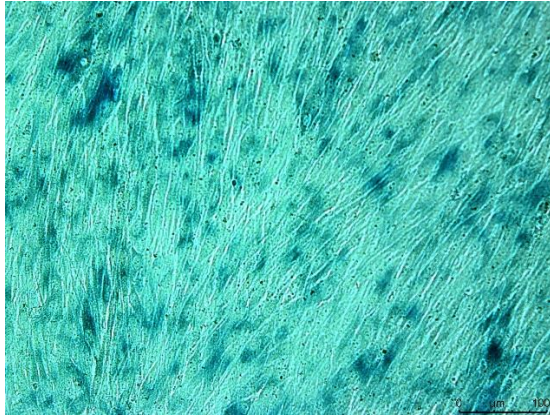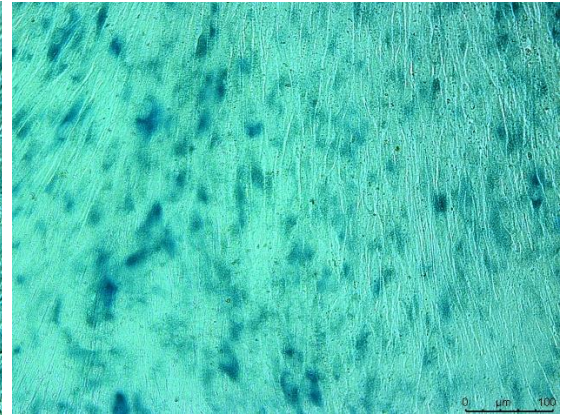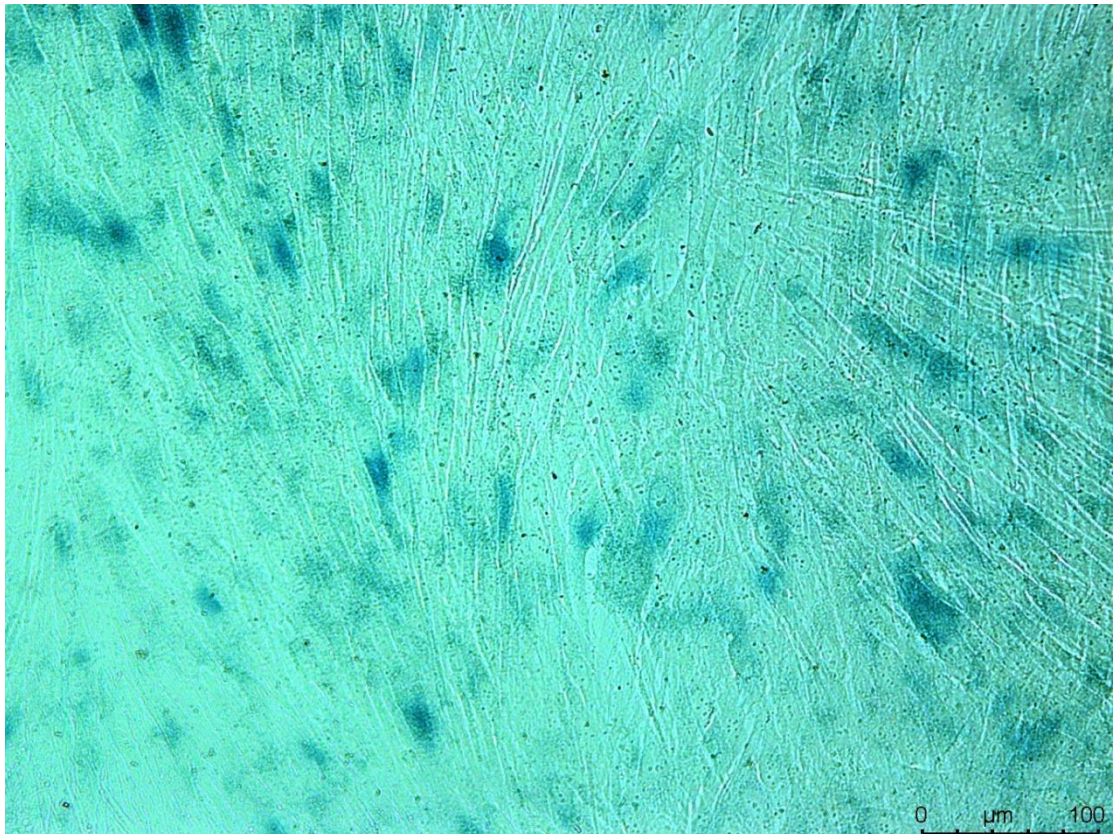



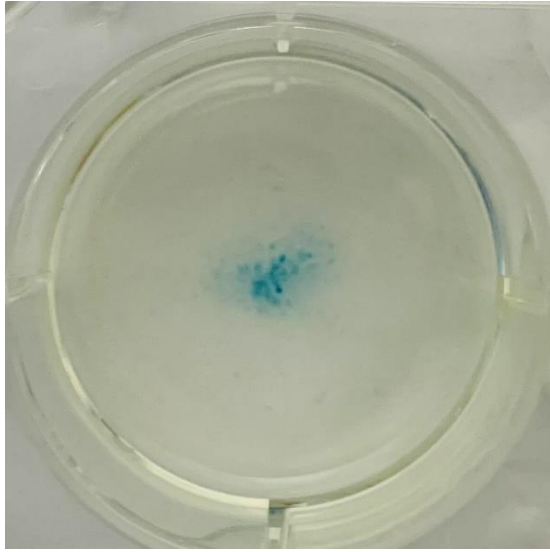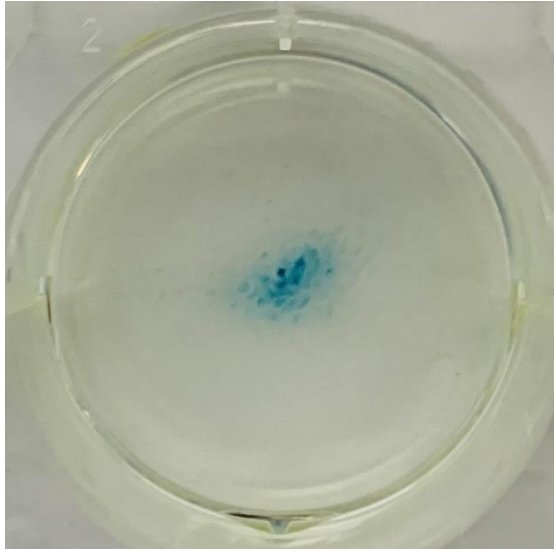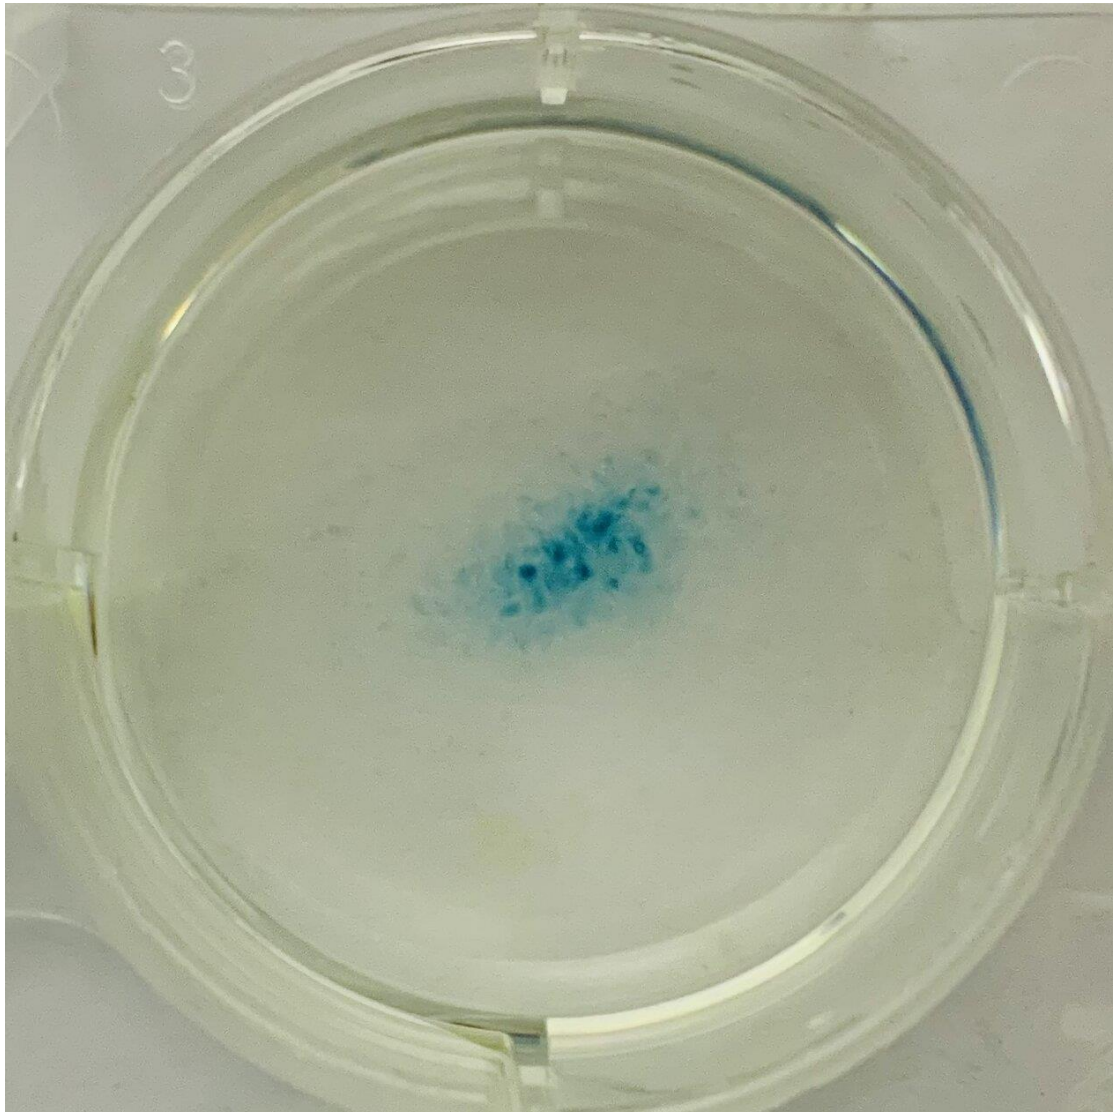



40G

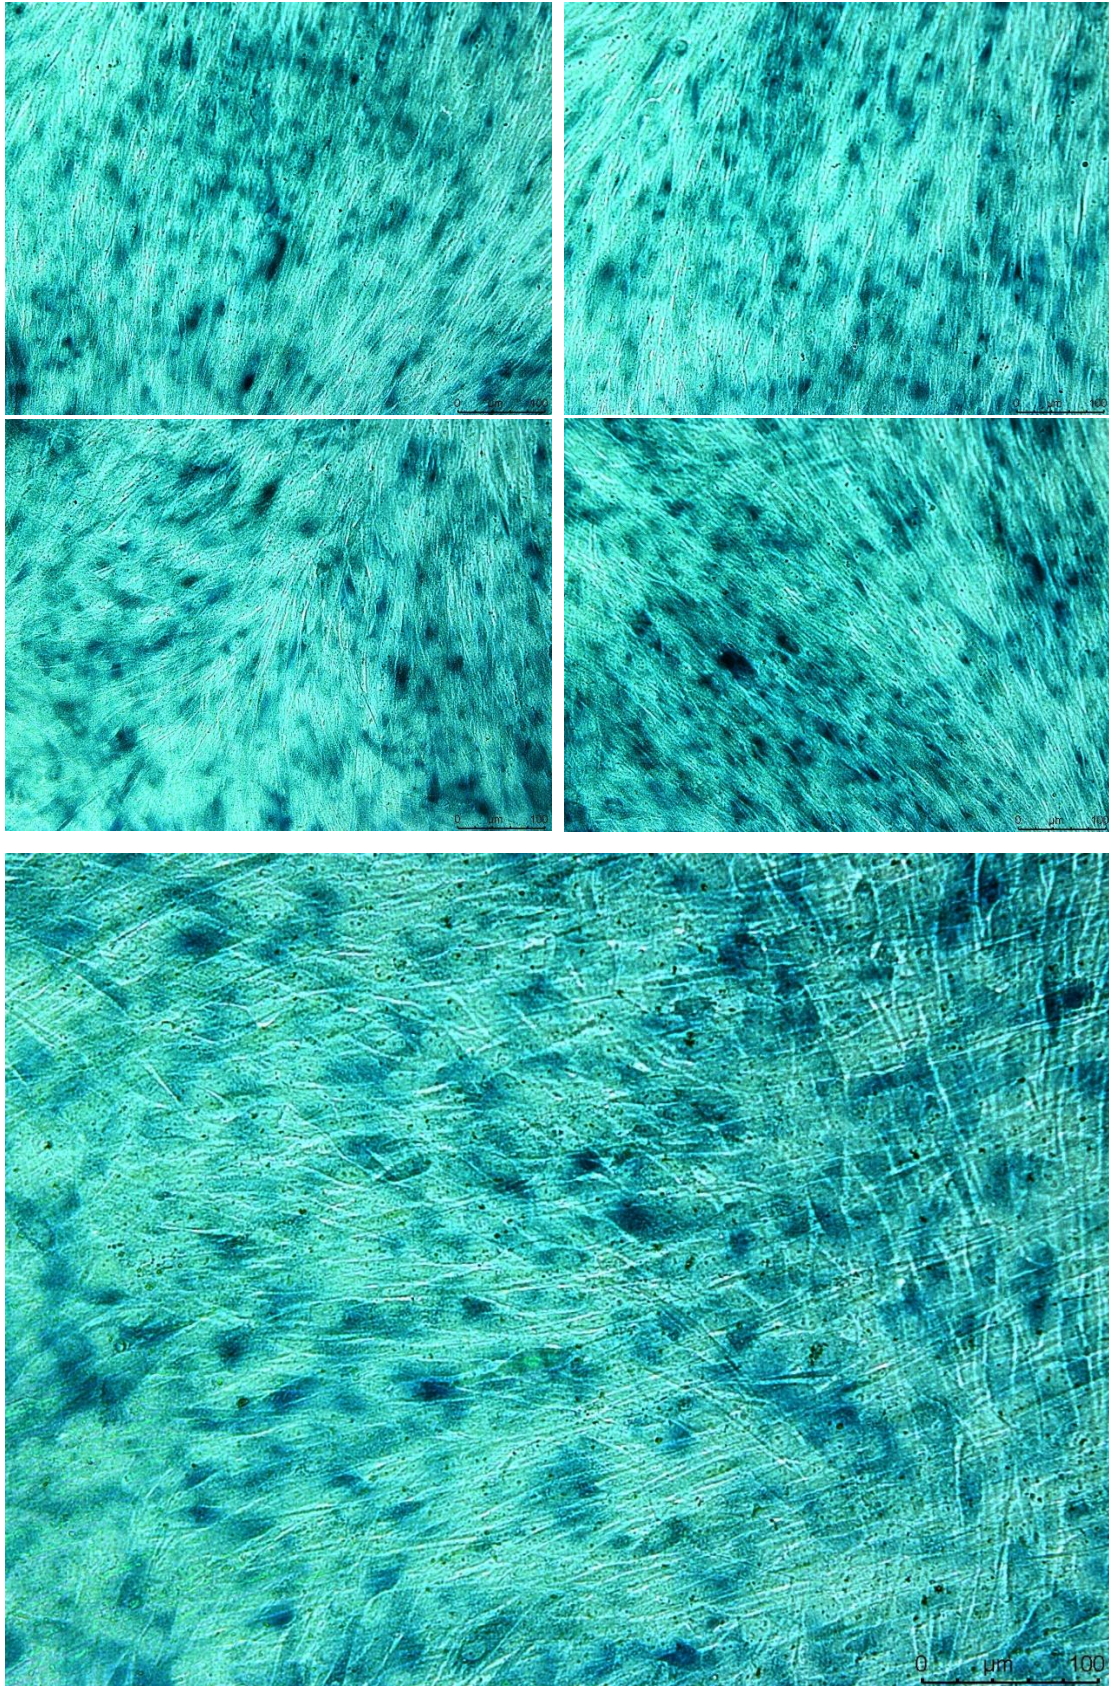



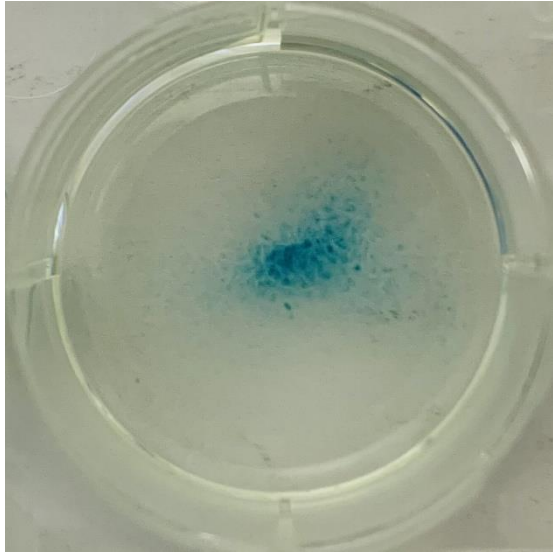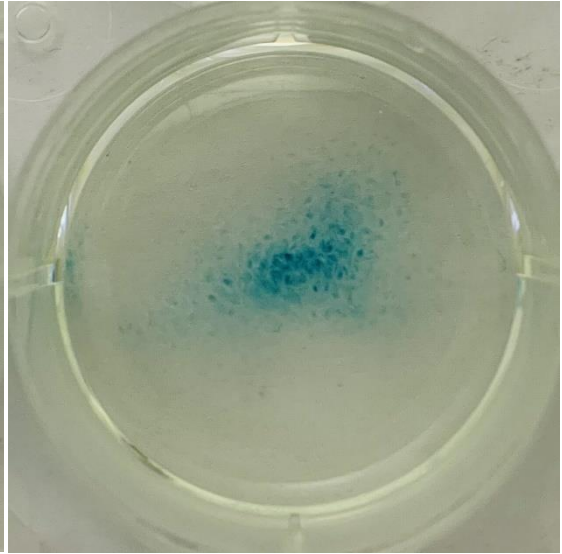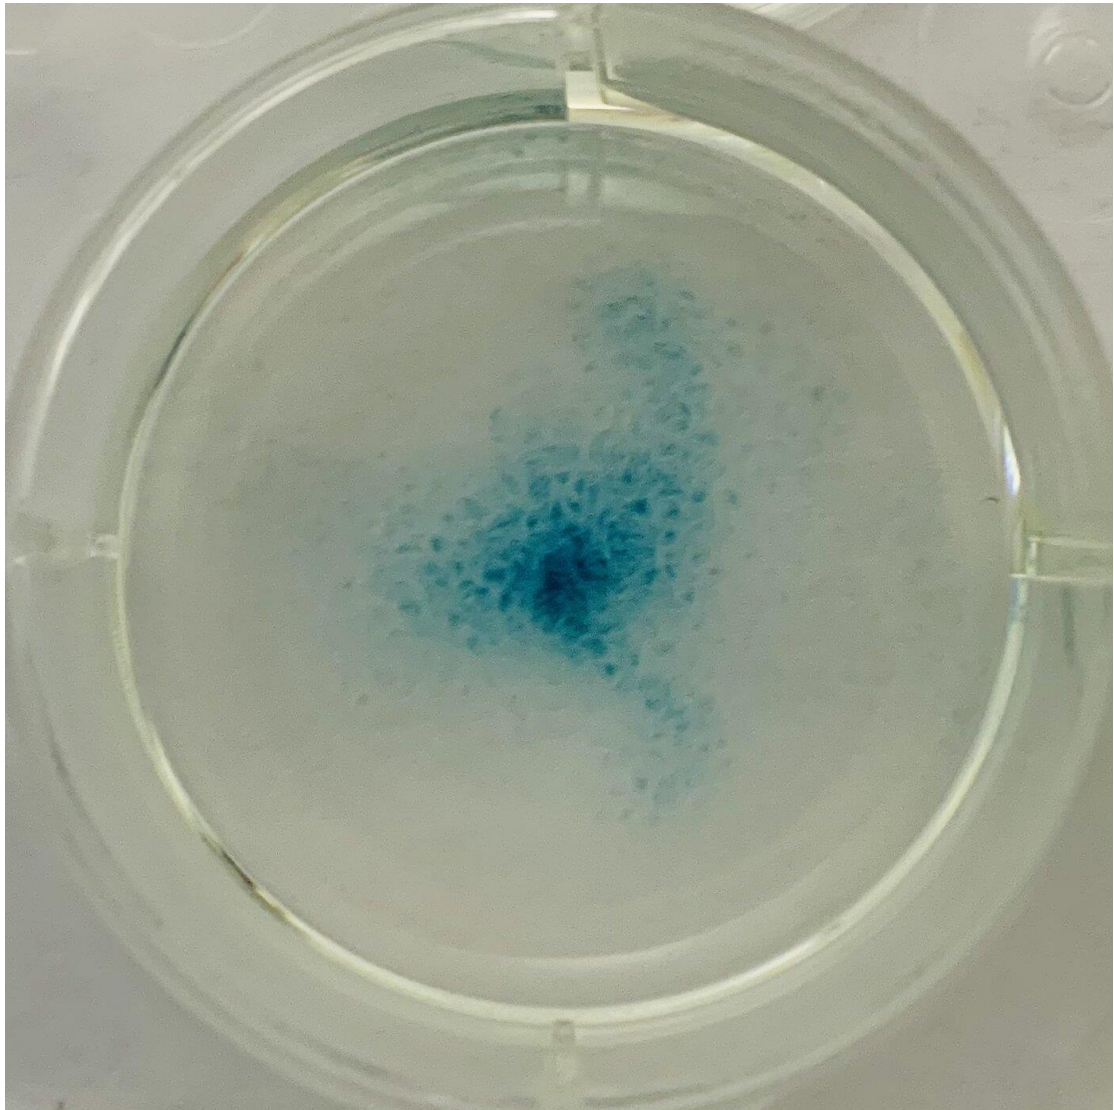



40G+A

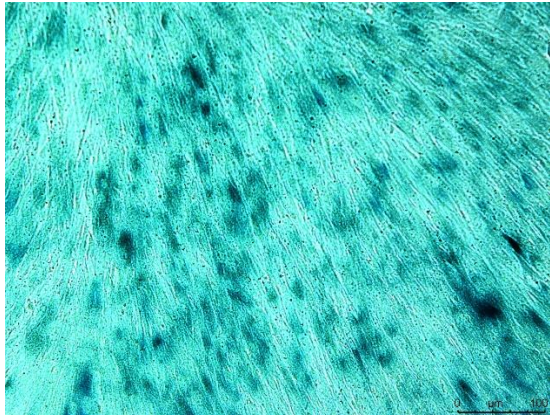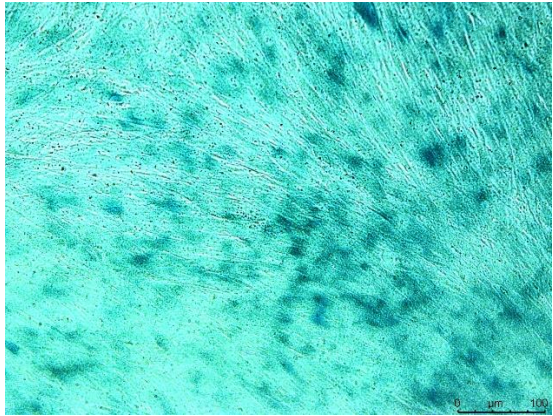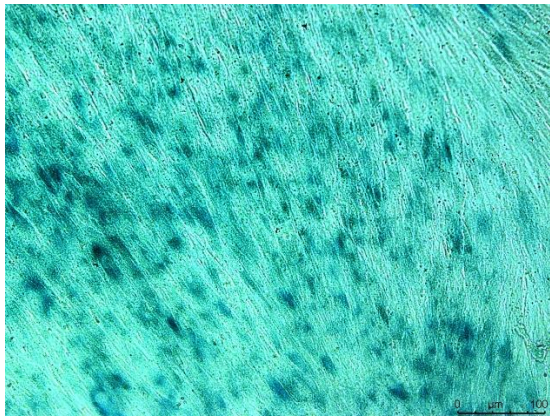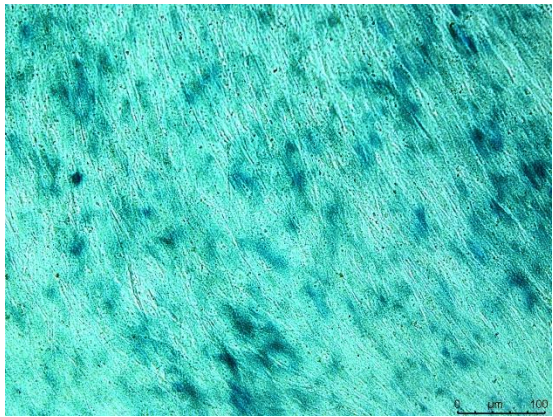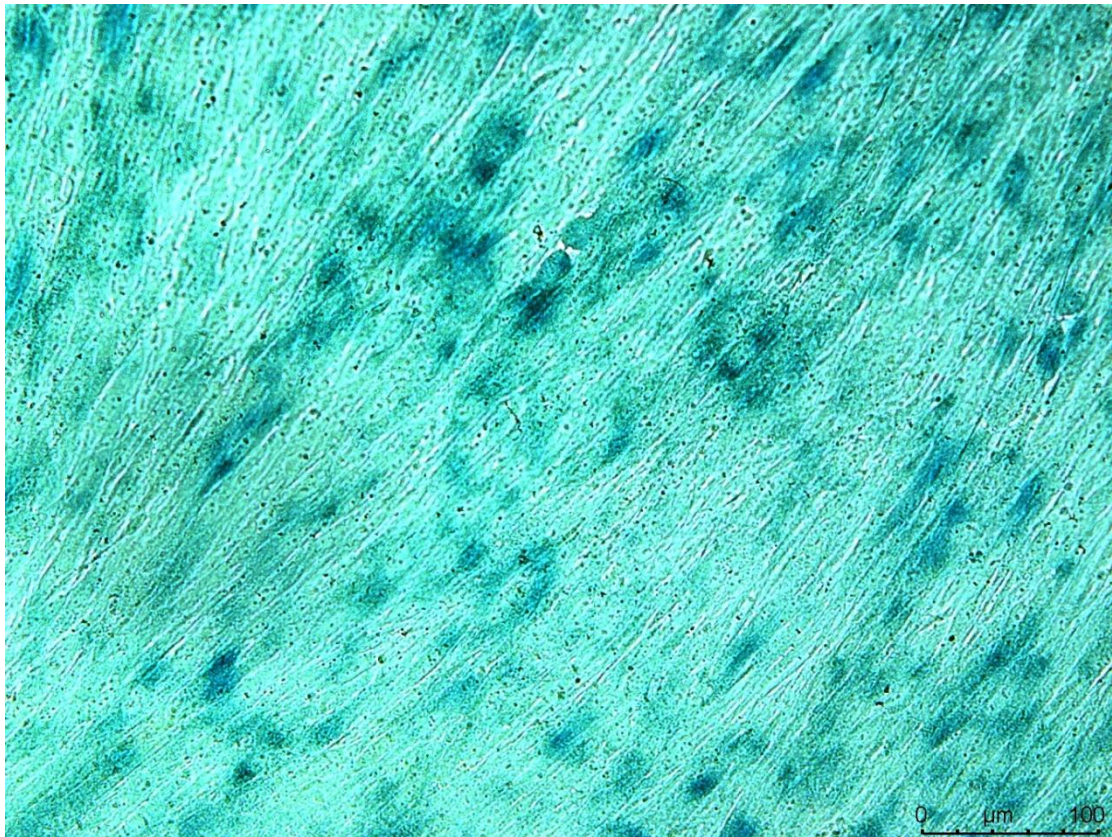



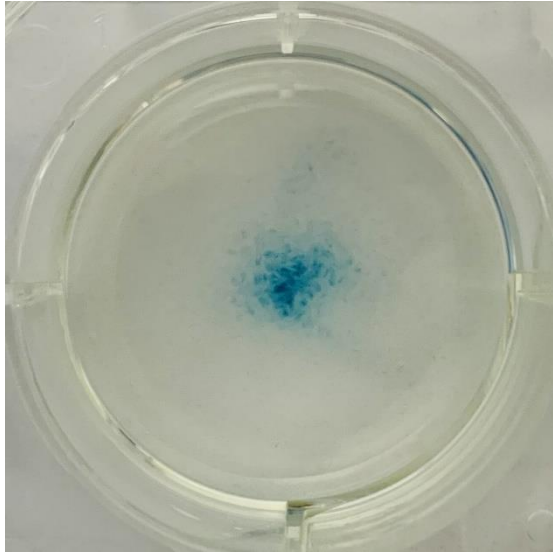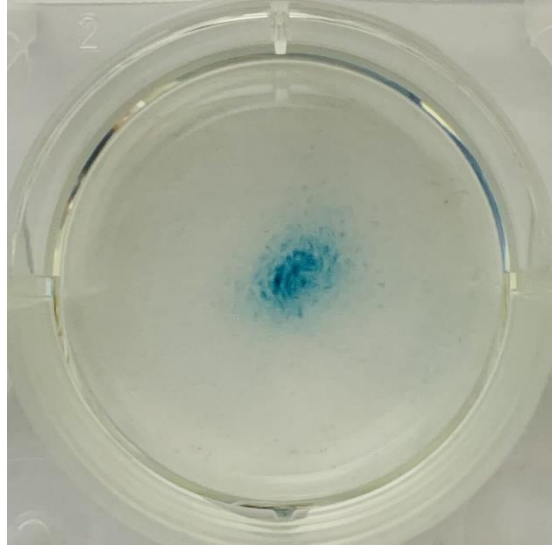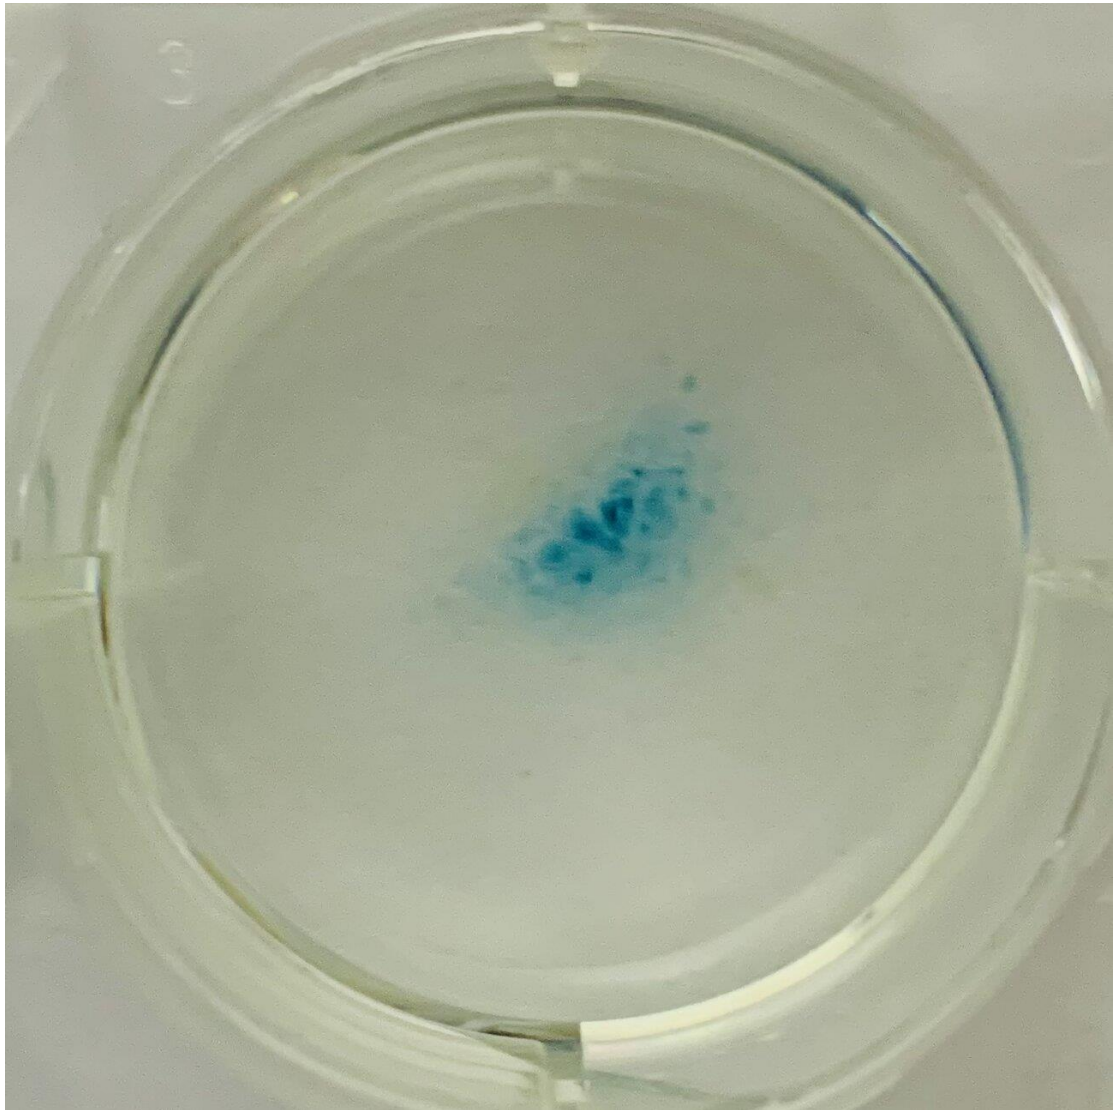



Merge

CTRL

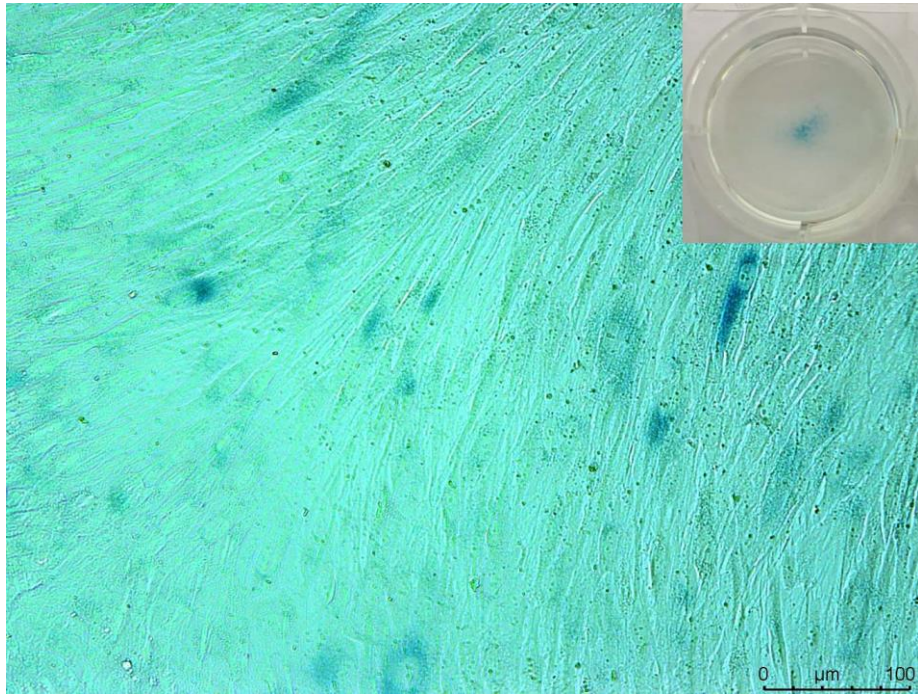

8G

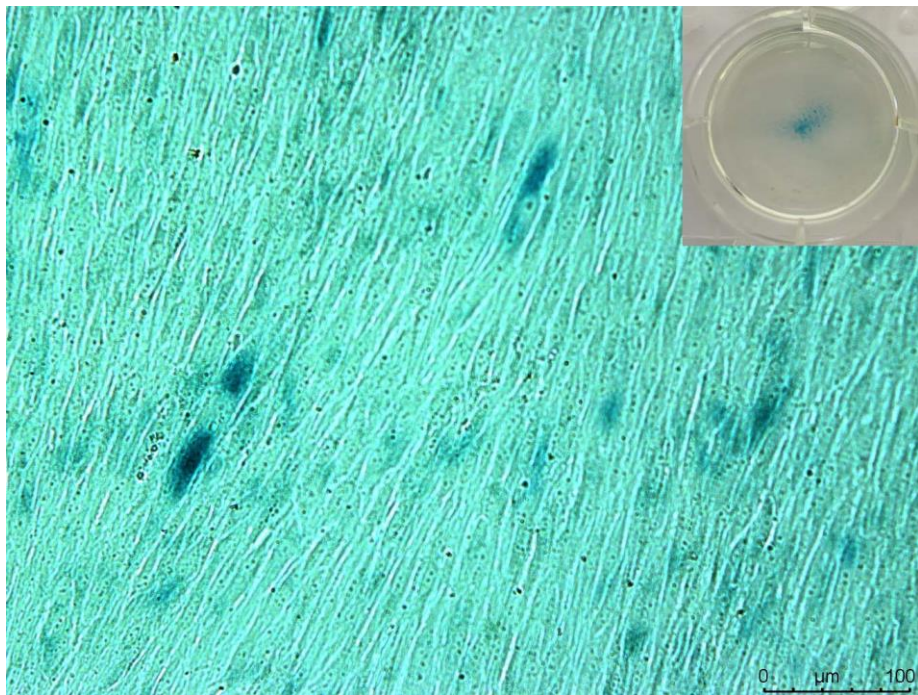



10G

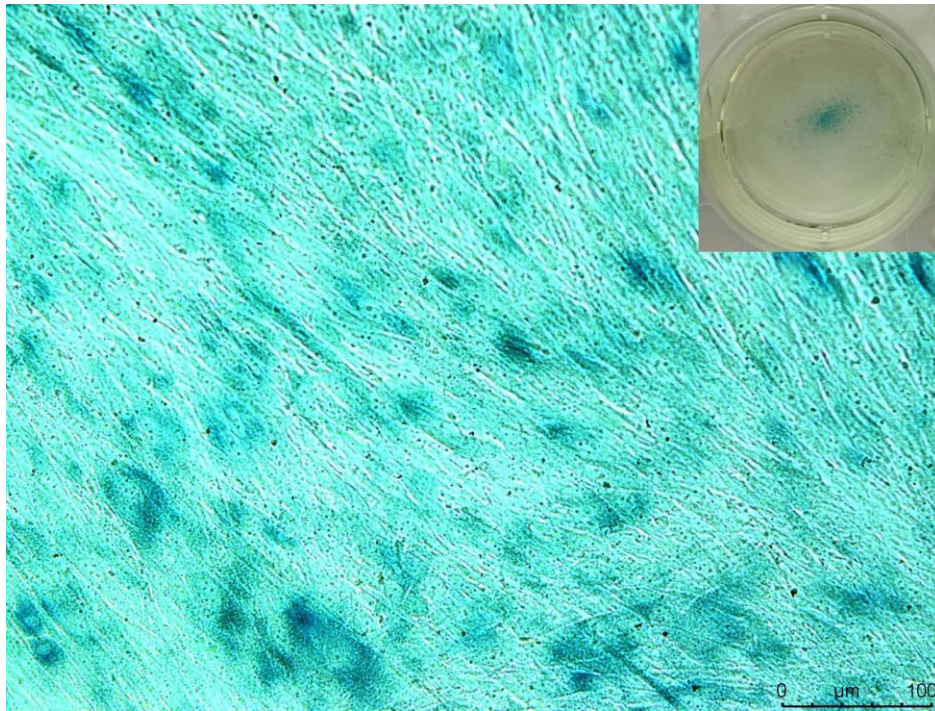

25G

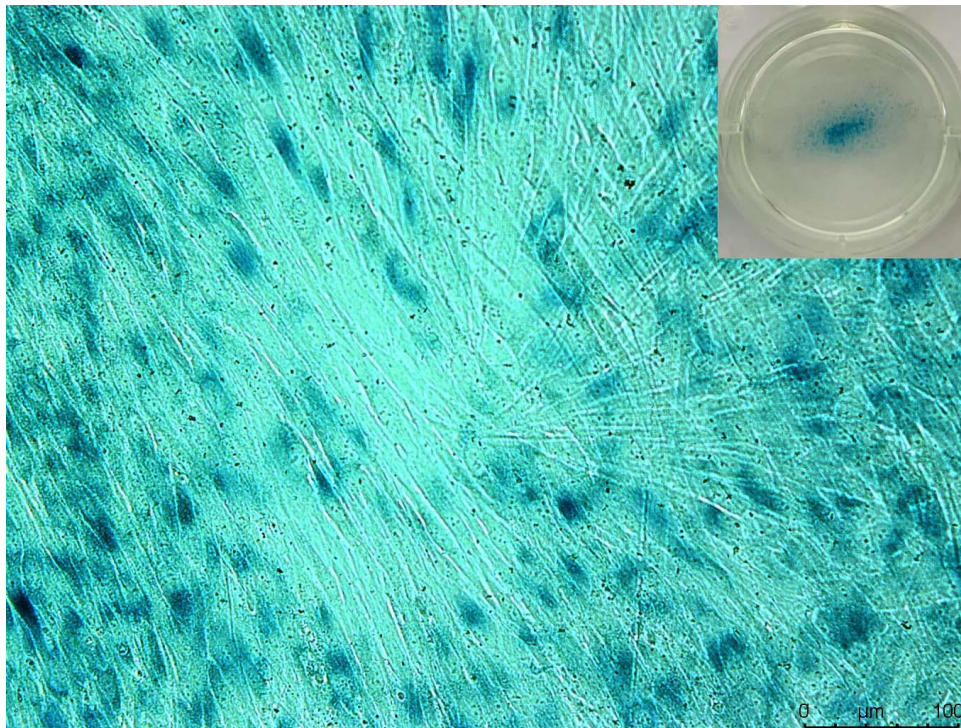



25G+A

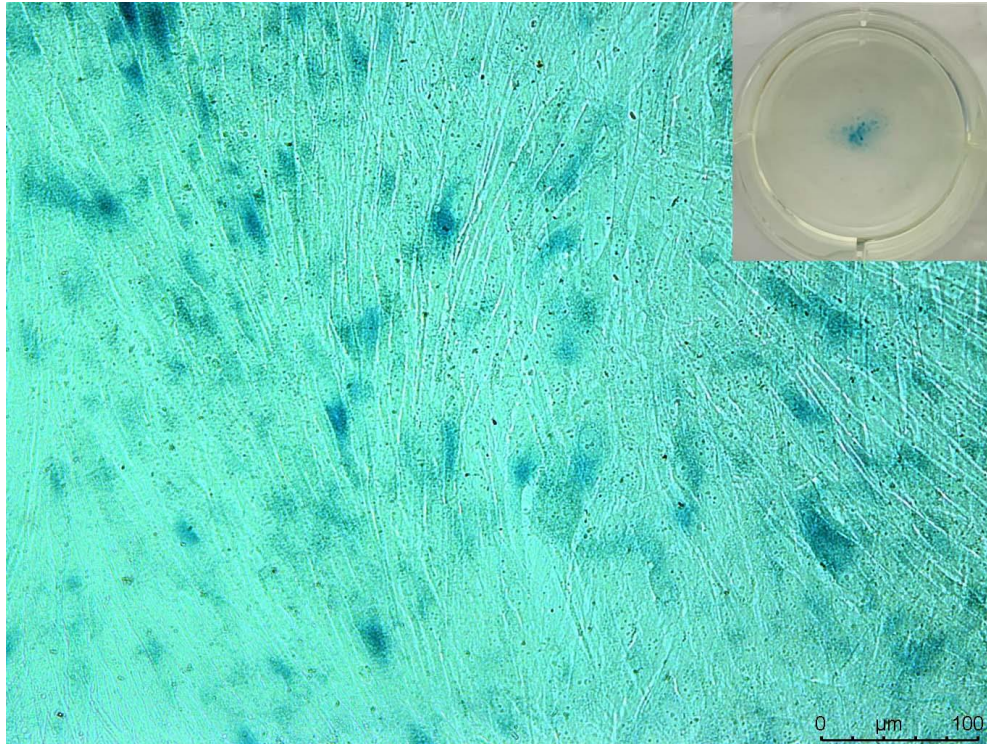

40G

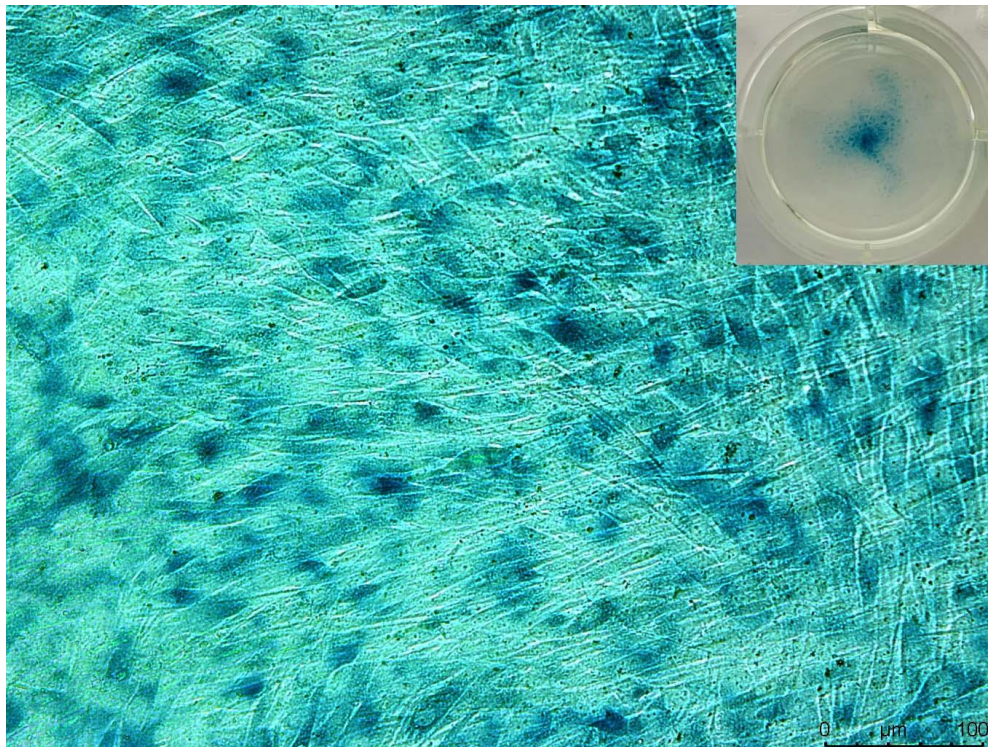



40G+A

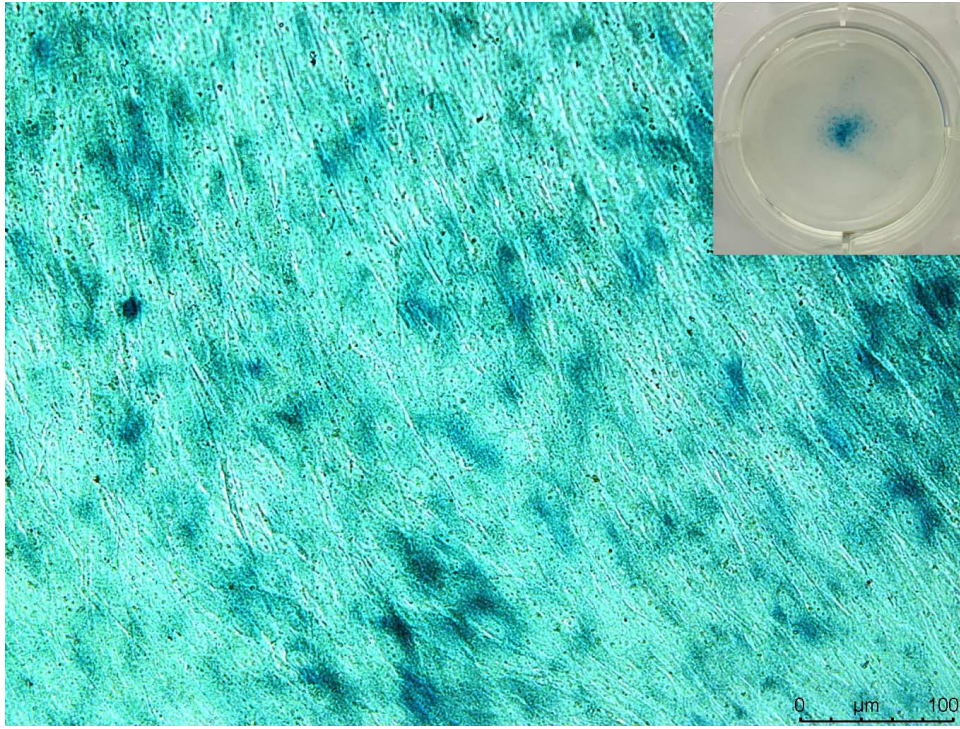

Supplement: B-Gal_images.pdf [file B-Gal_images.pdf]

CTRL

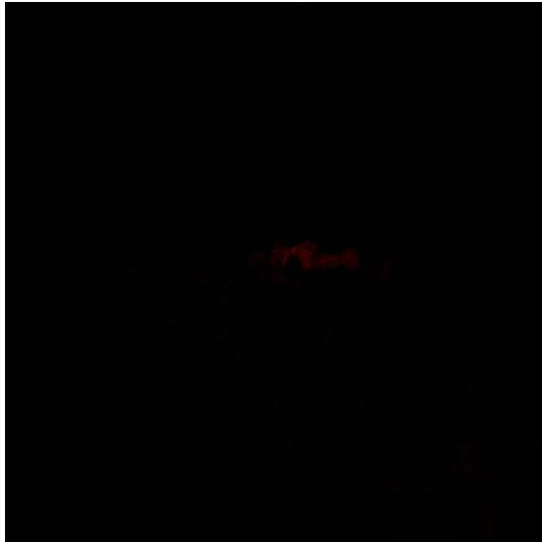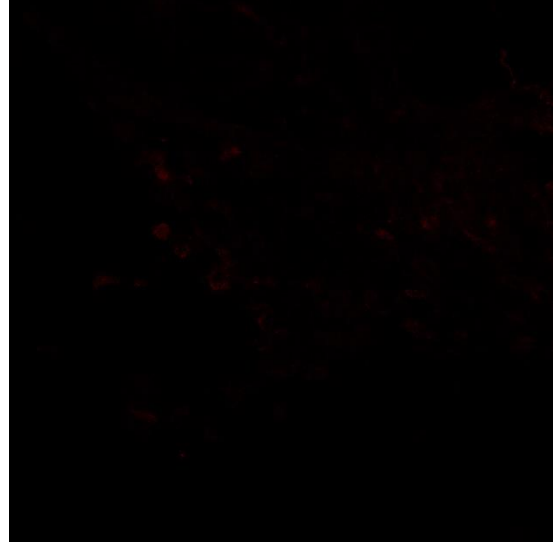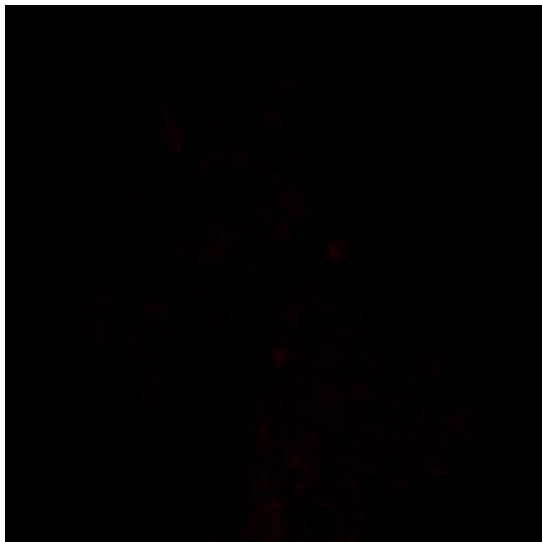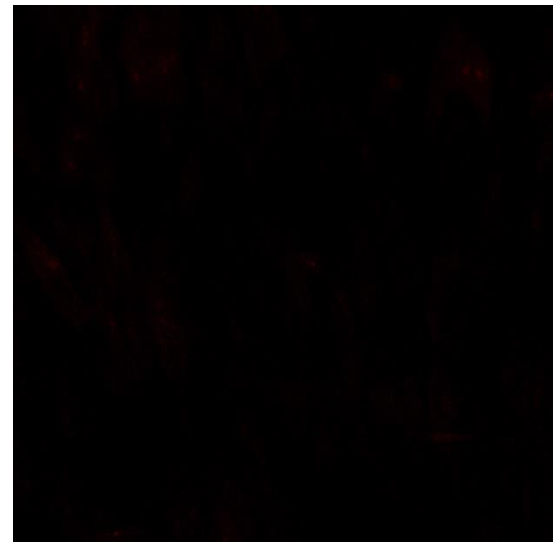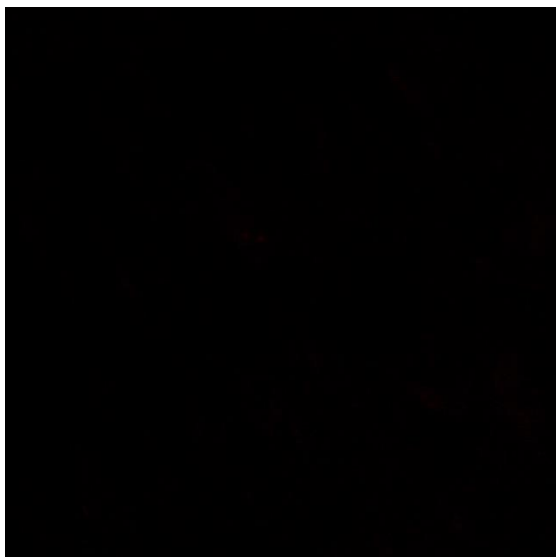

25mM

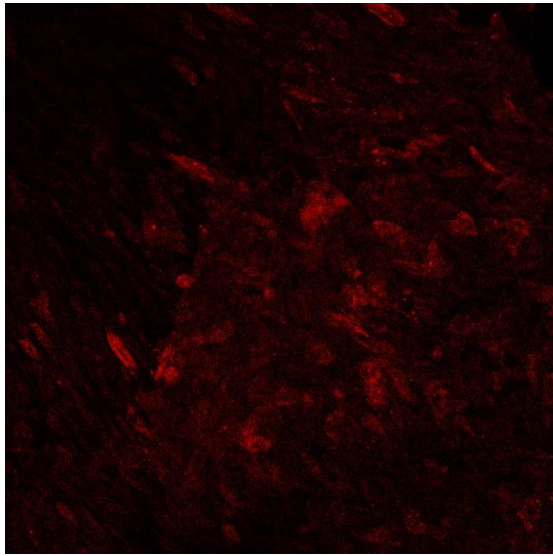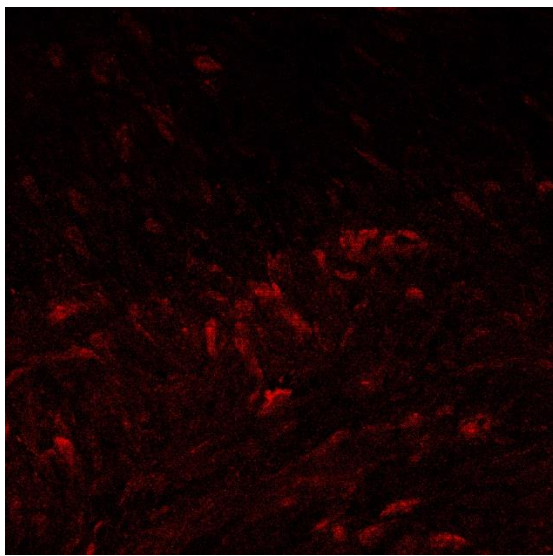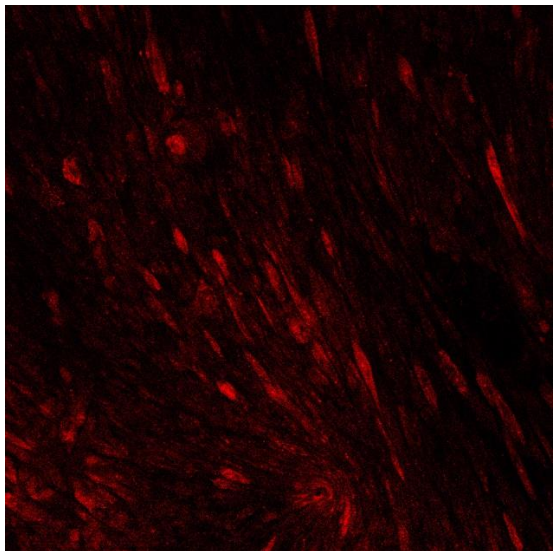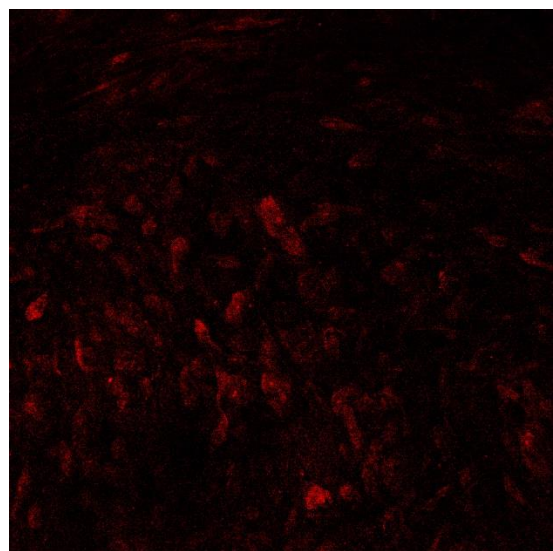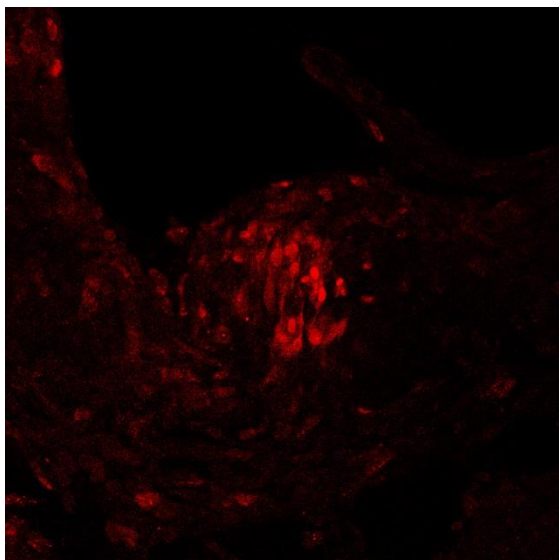

25Mm+A

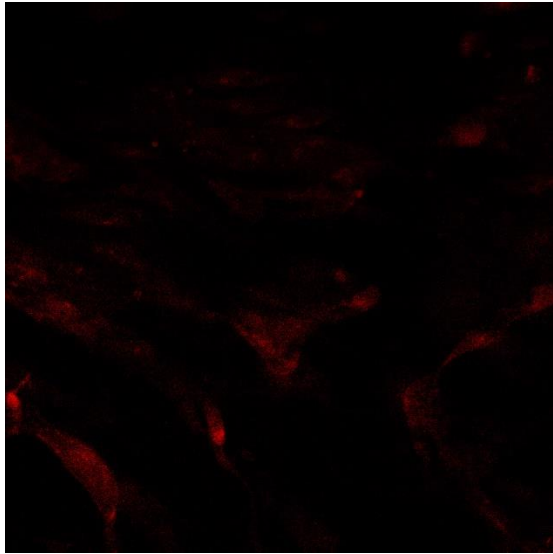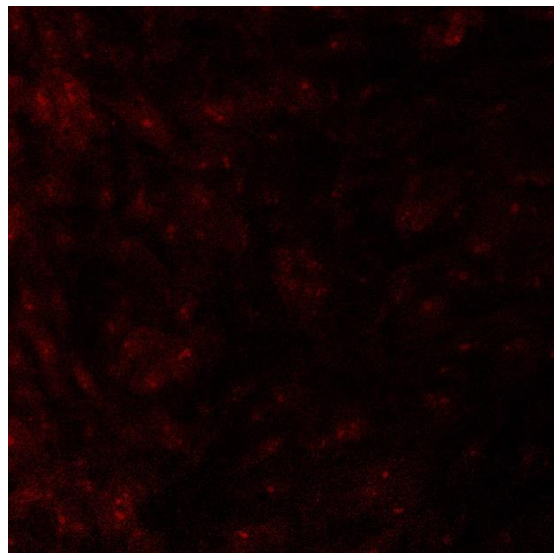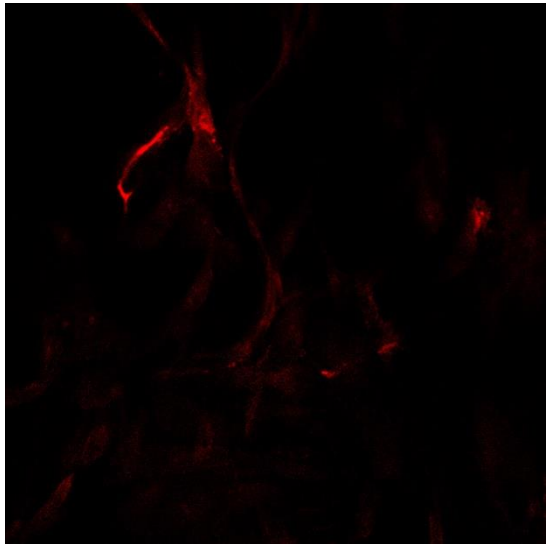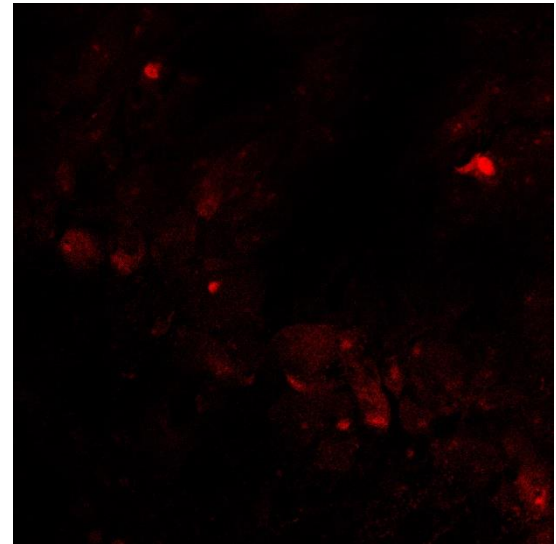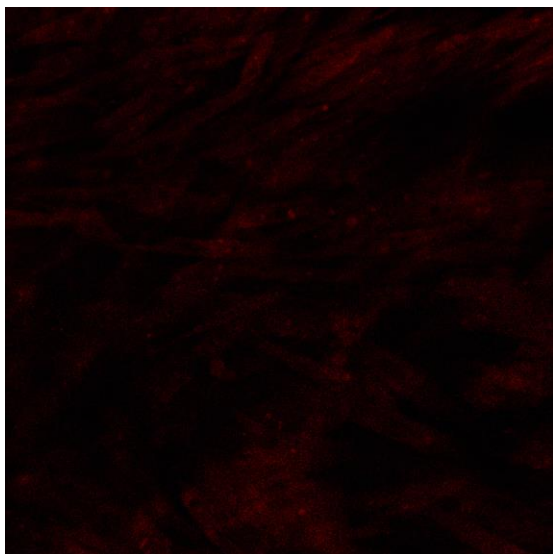

40Mm

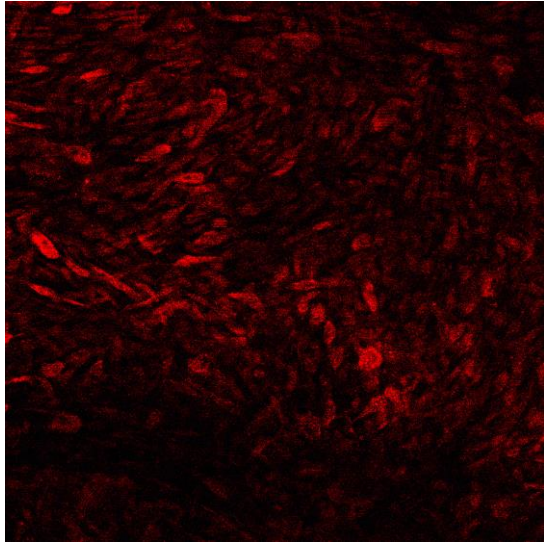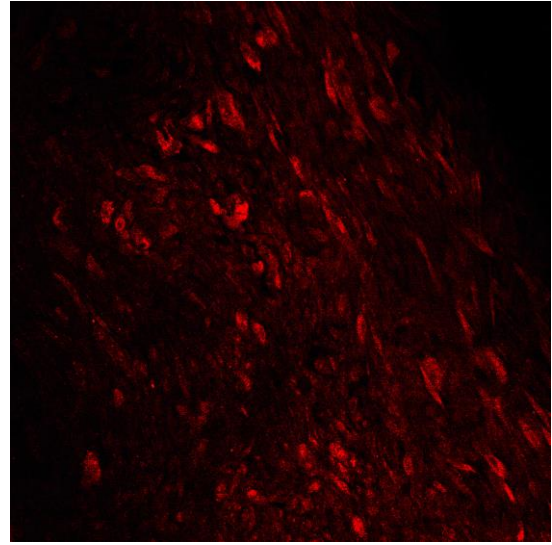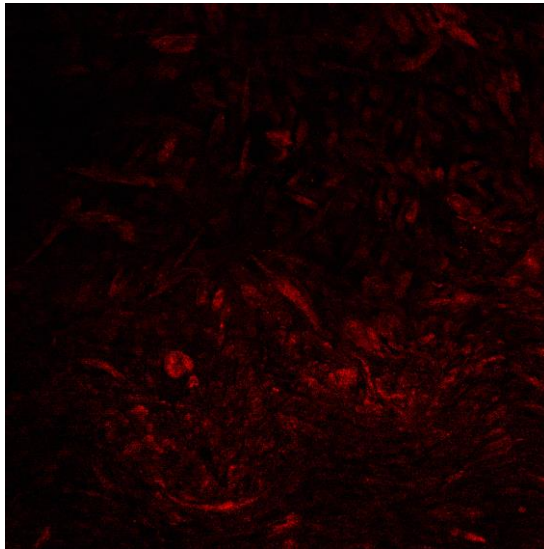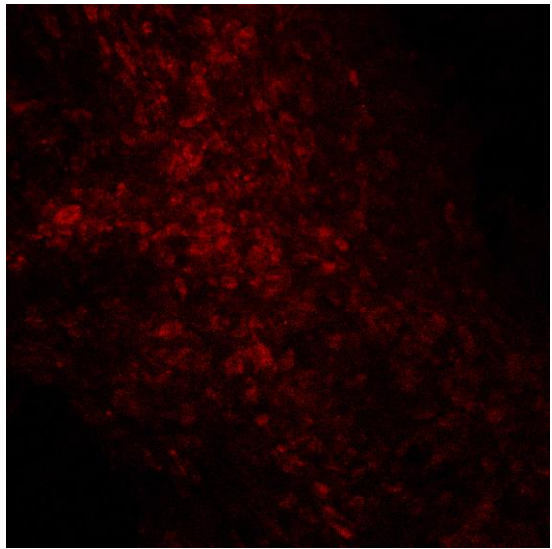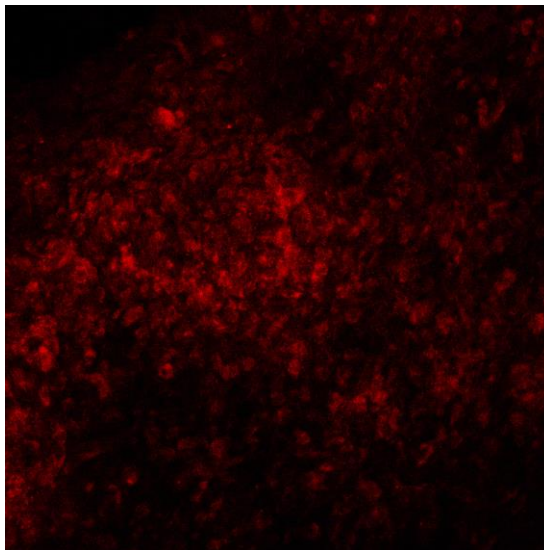

40mM+A

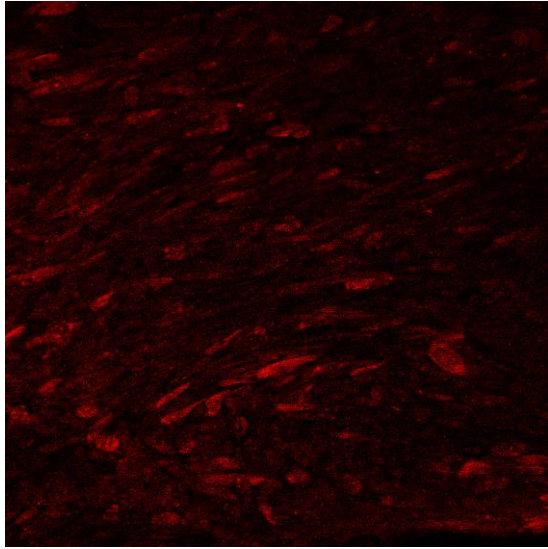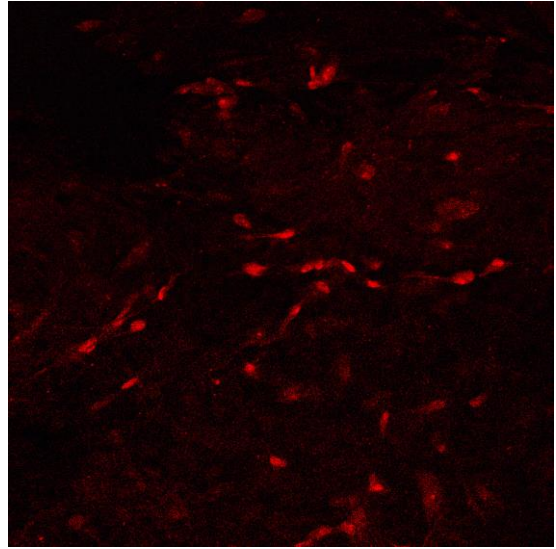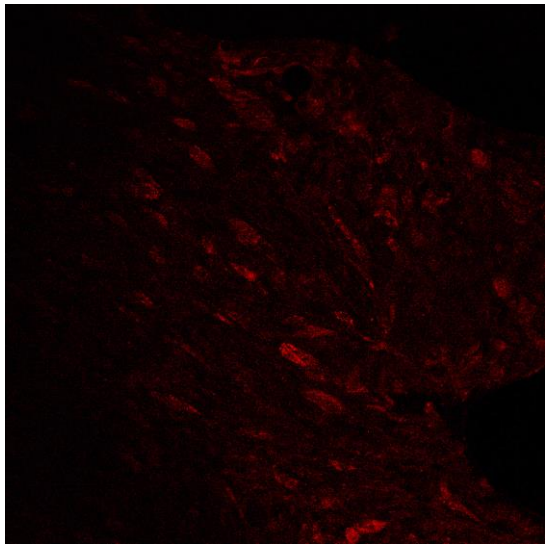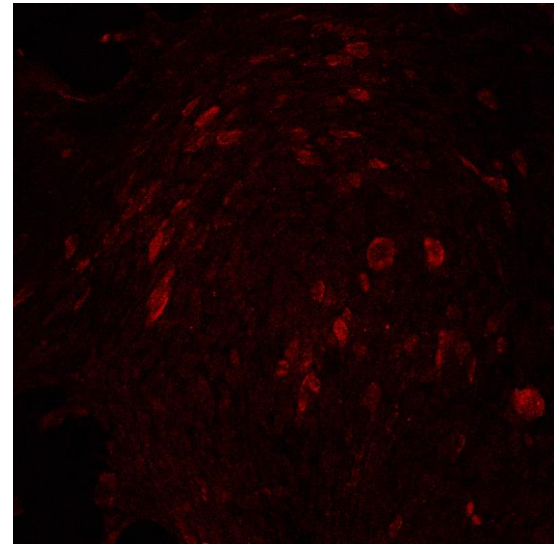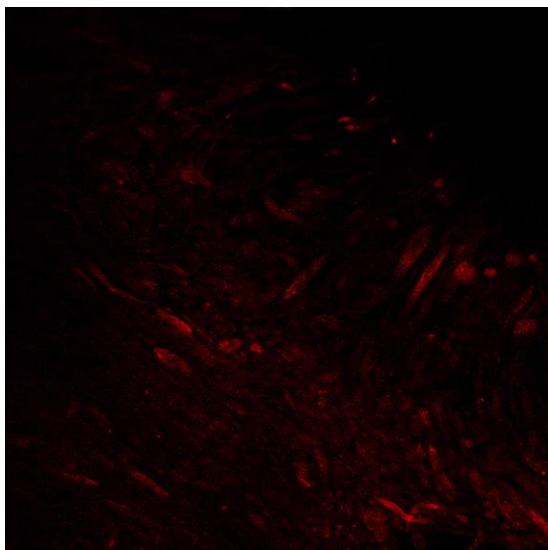

Supplement: ROS-images.pdf [file ROS-images.pdf]
